# Supplementary material for: Total synthesis of avenaol
Source: PubMed Central journal article supplement (PMC5610312; doi:10.1038/s41467-017-00792-1), 2017-09-22
Supplement: 41467_2017_792_MOESM1_ESM.pdf [file 41467_2017_792_MOESM1_ESM.pdf]

# SI GUIDE

File Name: Supplementary Information

Description: Supplementary Figures and Supplementary Tables.

## Supplementary Figures

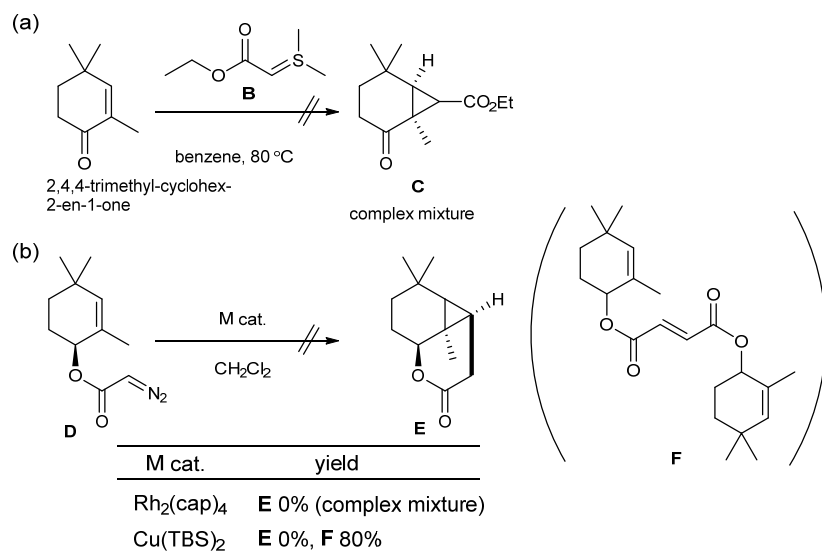

**Supplementary Fig. 1. Initial attempts for construction of bicyclo[4.1.0]heptanone having an all-*cis* cyclopropane.** To construct an all-*cis* substituted cyclopropane, we initially attempted an intermolecular 1,4-addition of 2,4,4-trimethylcyclohex-2-en-1-one with dimethylsulfonium ylide **B**, but the reactions did not proceed at all (a). An intramolecular cyclopropanation of diazoester **D** was next attempted. A treatment of **D** with Rh<sub>2</sub>(cap)<sub>2</sub> gave a complex mixture (b). On the other hand, use of Cu(TBS)<sub>2</sub> resulted in dimerization to give compound **F** in high yield. During these investigations, the desired products **C** and **E** were not detected at all.

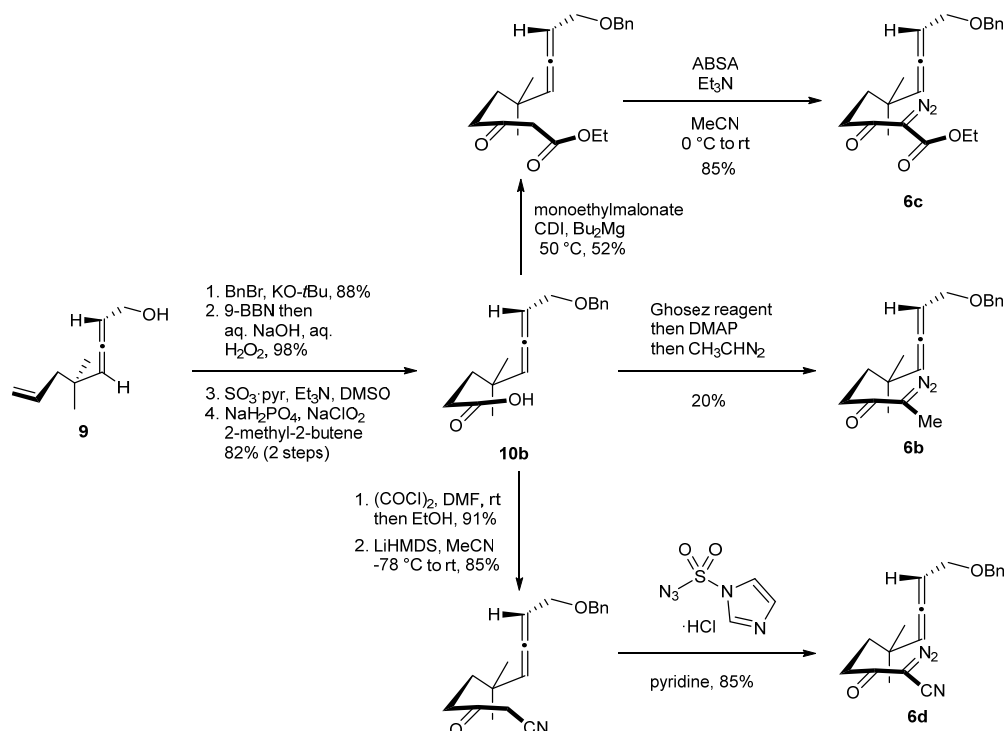

**Supplementary Fig. 2. Synthesis of  $\alpha$ -diazoketones **6b-d**.** To prepare benzyl-protected methyl diazoketone **6b**;  $\alpha$ -diazo- $\beta$ -ketoester **6c** and ketonitrile **6d** were also synthesized via **10b** using approximately the same sequence for synthesis of **6a**.

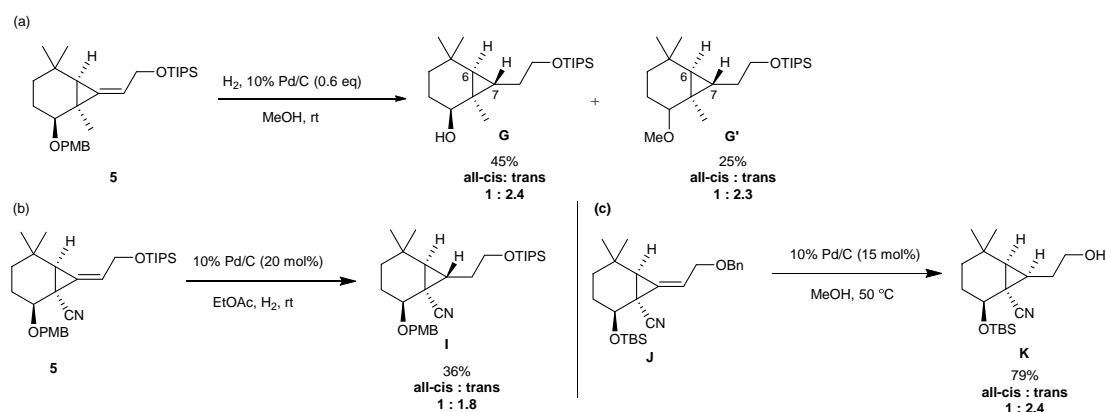

**Supplementary Fig. 3. Hydrogenation of alkyldenecyclopropane.** Hydrogenation of alkyldenecyclopropane **5** with Pd/C under H<sub>2</sub> in MeOH gave an undesired trans isomer **G** as a major product (a). We also tried hydrogenation in EtOAc or with another substrate having nitrile group. These reactions gave a mixture in which a trans substituted silyl ether **I** and alcohol **K** were major products, respectively (b and 3).

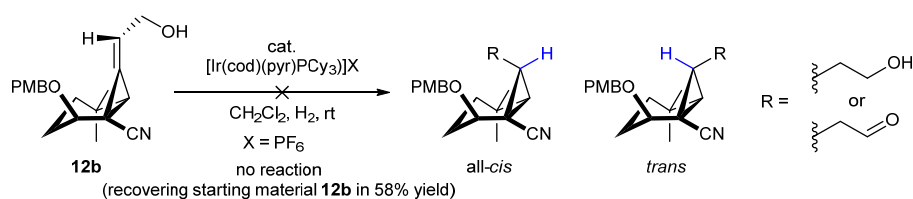

**Supplementary Fig. 4. Failed attempt of formation of all-*cis*-substituted cyclopropane.** Use of a substrate **12b** having nitrile and hydroxyl groups resulted in no reaction, and recovering a starting material in 58% yield.

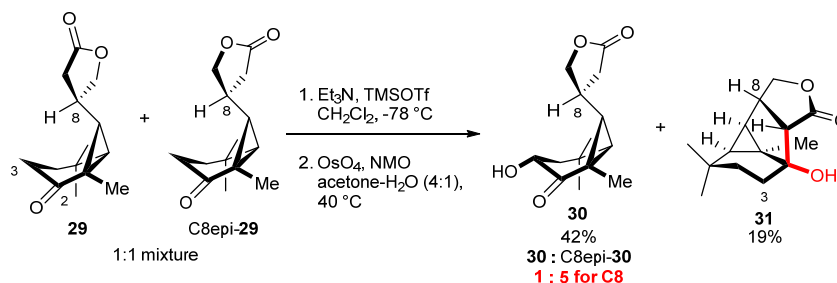

**Supplementary Fig. 5. Unexpected formation of cage structure.** A diastereomeric mixture of ketolactone **29** and C8-epi-**29** was converted to silyl enol ethers followed by dihydroxylation with OsO<sub>4</sub>. While the oxidant approached from  $\alpha$ -face to give compound **30** having desired stereochemistry, it was minor because an intramolecular aldol cyclization proceeded to give product **31** from compound **29**. These results indicated that **29** was readily to cyclize to form cage-structure under basic conditions, and while stereoselective C3 oxidation of C8-epi-**29** occurred to give an undesired isomer C8-epi-**30**.

## Supplementary Table

### Supplementary Table 1. Formation of tetrahydrofuran.

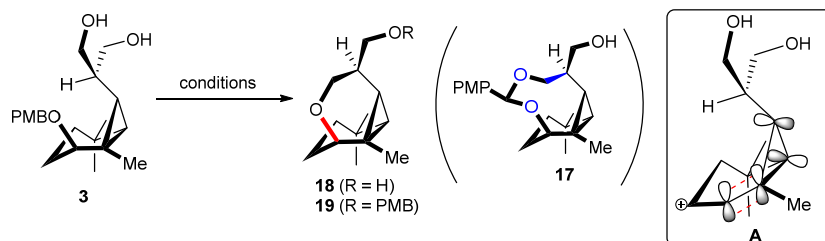

| Entry | Conditions                                                               | Isolated yield                        |
|-------|--------------------------------------------------------------------------|---------------------------------------|
| 1     | DDQ, MS 4A, CH <sub>2</sub> Cl <sub>2</sub> , 0 °C                       | <b>18</b> : ca. 30% ( <b>17</b> : 0%) |
| 2     | Cu(OTf) <sub>2</sub> , CH <sub>2</sub> Cl <sub>2</sub> , rt              | <b>18</b> : trace                     |
| 3     | Zn(OTf) <sub>2</sub> , CH <sub>2</sub> Cl <sub>2</sub> , rt              | <b>18</b> : 14%                       |
| 4     | Sc(OTf) <sub>3</sub> , CH <sub>2</sub> Cl <sub>2</sub> , rt              | <b>18</b> : 27%, <b>19</b> : 36%      |
| 5     | BF <sub>3</sub> ·OEt <sub>2</sub> , CH <sub>2</sub> Cl <sub>2</sub> , rt | <b>18</b> : 64%, <b>19</b> : 17%      |
| 6     | pTsOH, CH <sub>2</sub> Cl <sub>2</sub> , rt                              | <b>18</b> : 35%, <b>19</b> : 65%      |
| 7     | pTsOH, PhSH, CH <sub>2</sub> Cl <sub>2</sub> , rt                        | <b>18</b> : 88%                       |

In the case of DDQ, the reaction gave various unidentified products, and the only isolated product was compound **18** (Supplementary Table 1, entry 1). Use of Cu(OTf)<sub>2</sub> was not effective, the reaction did not proceed, and almost all of the starting material was recovered (Supplementary Table 1, entry 2). In the case of Zn(OTf)<sub>2</sub>, a significant amount of the starting material was recovered, while the reaction gave the desired product in 14% yield (Supplementary Table 1, entry 3). Through these examinations as shown in this table, a ring-opening product was not observed.

## Supplementary Methods

### General Information

All non-aqueous reactions were carried out under a positive atmosphere of argon in dried glassware. Analytical thin-layer chromatography was performed with Silica gel 60 (Merck). Silica gel column chromatography was performed with Kanto silica gel 60 (particle size, 63–210  $\mu\text{m}$ ) and Fuji silysia Chromatorex BW-300. All melting points were determined on YAMAMOTO micro melting point apparatus and are uncorrected. Proton nuclear magnetic resonance ( $^1\text{H}$  NMR) spectra were recorded on a JEOL JNM-ECA 500 at 500 MHz or a JEOL JNM-AL 400 at 400 MHz. Chemical shifts are reported relative to  $\text{Me}_4\text{Si}$  ( $\delta$  0.0) in  $\text{CDCl}_3$ , and residual solvents of  $\text{C}_6\text{D}_6$  ( $\delta$  7.16). Multiplicity is indicated by one or more of the following: s (singlet); d (doublet); t (triplet); q (quartet); m (multiplet); br (broad). Carbon nuclear magnetic resonance ( $^{13}\text{C}$  NMR) spectra were recorded on a JEOL JNM-ECA 500 at 126 MHz or a JEOL JNM-AL 400 at 100 MHz. Chemical shifts are reported relative to  $\text{CDCl}_3$  ( $\delta$  77.0),  $\text{C}_6\text{D}_6$  ( $\delta$  128.0). Infrared spectra were recorded on a FT/IR-4100 Fourier-transform infrared spectrometer ATR (attenuated total reflectance). Low and High resolution mass spectra were recorded on JEOL MS700 mass spectrometer for FAB-MS, and Shimadzu LCMS-IT-TOF for ESI-MS. Optical rotations were determined with a JASCO P-2200KDT polarimeter and are the average of five measurements.

### Synthetic procedure for total synthesis of avenaol (1).

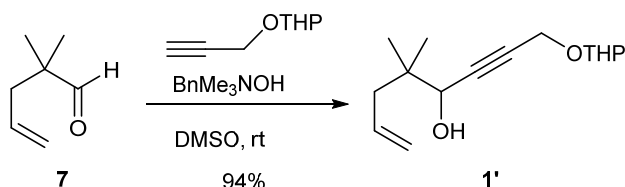

**Compound 1'**: To a solution of 2,2-dimethyl-4-pentenal **7** (43.3 g, 386 mmol) in  $\text{DMSO}$  (193 mL) were added triton B (40% in  $\text{MeOH}$ , 14.7 mL, 41.9 mmol) and (2-propynyloxy)tetrahydropyran (49.2 g, 351 mmol). The mixture was stirred at room temperature for 24 h, and it became a dark red solution. The resulting mixture was diluted with water at  $0\text{ }^\circ\text{C}$ , extracted with  $\text{EtOAc}$  three times. The combined organic layers were dried over  $\text{Na}_2\text{SO}_4$  and filtered. The filtrate was concentrated under reduced pressure, and a residue was purified by silica gel column chromatography (5–30%  $\text{EtOAc}/\text{hexane}$ ) to afford **1'** (96.8 g, 94%) as a colorless oil;  $^1\text{H}$  NMR (500 MHz,  $\text{CDCl}_3$ )  $\delta$  5.83 (m, 1H), 5.09 (d, 1H  $J = 5.5$  Hz), 5.06 (s, 1H), 4.32 (dd, 2H,  $J = 15.8, 24.9$  Hz), 4.13 (s, 1H), 3.84 (m, 1H), 3.55 (m, 1H), 2.21–2.07 (m, 2H), 1.87–1.71 (m, 3H), 1.65–1.52 (m, 4H), 0.98 (s, 3H), 0.97 (s, 3H);  $^{13}\text{C}$  NMR (125 MHz,  $\text{CDCl}_3$ )  $\delta$  134.8, 117.7, 96.6, 85.5, 82.0, 70.1, 62.0, 62.0, 60.3, 54.1, 42.7, 38.6, 30.2, 25.3, 22.6, 22.4, 19.0, 14.1; IR (ATR)  $\nu = 3438, 3073, 2942, 2871, 1638\text{ cm}^{-1}$ ; HRMS (ESI)  $m/z$  calcd for  $\text{C}_{15}\text{H}_{24}\text{O}_3\text{Na}$  [ $(\text{M}+\text{Na})^+$ ] 275.1618, found 275.1611.

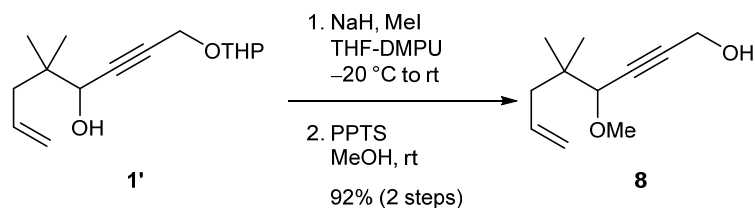

**Compound 8:** To a solution of compound **1'** (26.4 g, 105 mmol) in THF/DMPU (v/v = 4:1, 350 ml) was added sodium hydride (60% in mineral oil, 6.48 g, 162 mmol) at  $-20\text{ }^{\circ}\text{C}$ . The mixture was stirred for 30 min. Methyl iodide (9.80 mL, 157 mmol) was added to the reaction mixture. Then, the reaction mixture was stirred at room temperature for 1 h. The resulting mixture was quenched with satd. aq.  $\text{NH}_4\text{Cl}$  and extracted with ether three times. The combined organic layers were dried over  $\text{Na}_2\text{SO}_4$ , filtered, and concentrated under reduced pressure to give a crude propargyl methyl ether (34.8 g, crude).

To a solution of the above crude propargyl methyl ether (34.8 g, crude) in MeOH (290 mL) was added PPTS (18.8 g, 74.9 mmol) at room temperature. The solution was stirred overnight. The reaction was quenched with satd. aq.  $\text{NaHCO}_3$  at  $0\text{ }^{\circ}\text{C}$ . The mixture was extracted with ether three times, and the combined organic layers were washed with brine. The organic layer was dried over  $\text{Na}_2\text{SO}_4$ , filtered and concentrated under reduced pressure. The residue was purified by silica gel column chromatography (5-25% EtOAc/hexane) to give **8** (17.5 g, 92% for 2 steps) as a colorless oil:  $^1\text{H}$  NMR (500 MHz,  $\text{CDCl}_3$ )  $\delta$  5.80 (m, 1H), 5.07 (s, 1H), 5.04 (d,  $J = 6.0$  Hz), 4.34 (dd, 2H,  $J = 1.5$  Hz,  $J = 6.0$  Hz), 3.62 (s, 1H), 3.40 (s, 3H), 0.60 (d, 1H,  $J = 8.0$  Hz), 2.14 (d, 1H,  $J = 7.5$  Hz), 2.11 (d, 1H,  $J = 7.5$  Hz), 2.08 (d, 1H,  $J = 8.0$  Hz), 0.97 (s, 3H), 0.95 (s, 3H);  $^{13}\text{C}$  NMR (125 MHz,  $\text{CDCl}_3$ )  $\delta$  134.7, 117.5, 85.0, 83.3, 79.1, 57.4, 51.2, 42.9, 38.2, 23.1, 22.7; IR (ATR)  $\nu = 3414, 3075, 2975, 2822, 2362\text{ cm}^{-1}$ ; HRMS (ESI)  $m/z$  calcd for  $\text{C}_{11}\text{H}_{19}\text{O}_2$  [(M+H) $^+$ ] 183.1380, found  $m/z$  183.1372.

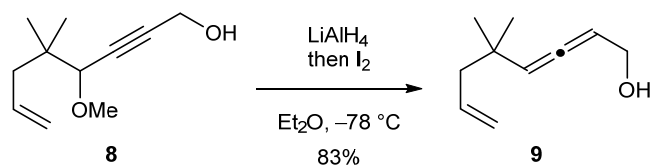

**Compound 9:** To a solution of  $\text{LiAlH}_4$  (3.99 g, 105 mmol) in  $\text{Et}_2\text{O}$  (331 mL) was added an  $\text{Et}_2\text{O}$  (19 mL) solution of **8** (6.39 g, 35.1 mmol) dropwise through cannula at  $-78\text{ }^{\circ}\text{C}$ . After the reaction mixture was stirred at room temperature for 1 h,  $\text{I}_2$  (23.9 g, 94.2 mmol) was added slowly at  $-78\text{ }^{\circ}\text{C}$ , and then stirred at room temperature for 45 min. The reaction was quenched with a mixed solution of satd. aq. Rochelle salt and 10% aq.  $\text{Na}_2\text{S}_2\text{O}_3$ . The resulting mixture was extracted with ether three times, dried over  $\text{Na}_2\text{SO}_4$ , filtered and concentrated under reduced pressure. The residue was purified by silica gel column chromatography (10-20% EtOAc/hexane) to afford as **9** colorless oil

(4.44 g, 83%):  $^1\text{H}$  NMR (500 MHz,  $\text{CDCl}_3$ )  $\delta$  5.82 (m, 1H), 5.43 (dd, 2H,  $J = 6.0, 11.7$  Hz), 5.30 (m, 1H), 5.05 (m, 2H), 4.12 (m, 2H), 0.76 (d, 2H), 1.41 (t, 1H), 1.04 (s, 3H), 1.03 (s, 3H);  $^{13}\text{C}$  NMR (125 MHz,  $\text{CDCl}_3$ )  $\delta$  200.6, 135.1, 117.0, 104.1, 93.4, 60.5, 47.1, 27.6, 27.2; IR (ATR)  $\nu = 3377, 3074, 2961, 2927, 2870, 1960$   $\text{cm}^{-1}$ ; HRMS (ESI)  $m/z$  calcd for  $\text{C}_{10}\text{H}_{17}\text{O}$  [(M+H) $^+$ ] 153.1274, found 153.1273.

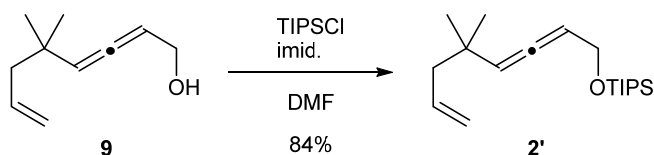

**Compound 2'**: To a solution of alcohol **9** (1.01 g, 6.64 mmol) in DMF (66 mL) were added imidazole (1.00 g, 14.7 mmol) and TIPSCl (1.6 mL, 7.55 mmol) at 0 °C. After the solution was stirred at room temperature for 1 h, the reaction was quenched with satd. aq.  $\text{NaHCO}_3$ . The mixture was extracted with ether three times, and the combined organic layers were washed with water, and brine. The organic layer was dried over  $\text{Na}_2\text{SO}_4$ , filtered and concentrated under reduced pressure. The residue was purified by silica gel column chromatography (hexane) to give **2'** (1.71 g, 84%) as a colorless oil:  $^1\text{H}$  NMR (500 MHz,  $\text{CDCl}_3$ )  $\delta$  5.81 (m, 1H), 5.32 (dd, 2H,  $J = 6.6, 12.5$  Hz), 5.17 (m, 1H), 5.02 (m, 2H), 4.25 (m, 2H), 2.07 (d, 2H,  $J = 7.4$  Hz), 1.14-1.05 (m, 21H), 1.01 (s, 6H);  $^{13}\text{C}$  NMR (125 MHz,  $\text{CDCl}_3$ )  $\delta$  201.4, 135.7, 117.1, 102.9, 93.9, 62.4, 47.7, 34.9, 27.8, 27.8, 18.2, 12.2; IR (ATR)  $\nu = 2959, 2952, 2892, 2865, 1463, 1091$   $\text{cm}^{-1}$ ; HRMS (ESI)  $m/z$  calcd for  $\text{C}_{19}\text{H}_{37}\text{O Si}$  [(M+H) $^+$ ] 309.2608, found 309.2600.

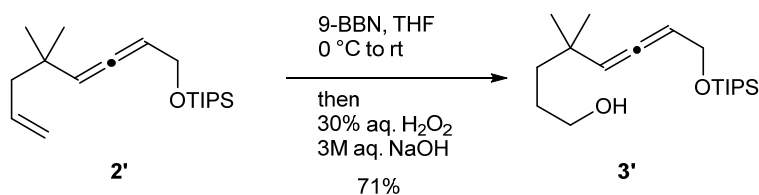

**Compound 3'**: To a solution of silyl ether **2'** (28.7 g, 93.1 mmol) in THF (465 mL) was added 9-BBN (0.5 M in THF, 186 mL, 93.1 mmol) at 0 °C dropwise. The reaction mixture was stirred at room temperature for 25 min. Additional 9-BBN (93 mL, 46.6 mmol) was added at 0 °C three times every 25 min. After confirming the starting material disappeared by TLC, 3 M aq.  $\text{NaOH}$  (186 mL) and 30%  $\text{H}_2\text{O}_2$  (63 mL) were added at 0 °C, and the resultant solution was stirred at room temperature for 25 min. After addition of satd. aq.  $\text{NH}_4\text{Cl}$ , the reaction mixture was extracted with  $\text{EtOAc}$  three times. The combined organic layers were washed with brine, dried over  $\text{Na}_2\text{SO}_4$ , filtered and concentrated under reduced pressure. The residue was purified by silica gel column chromatography (10-25%  $\text{EtOAc}$ /hexane) to afford **3'** as a colorless oil (21.5 g, 71%):  $^1\text{H}$  NMR (500



MHz, CDCl<sub>3</sub>) δ 5.31 (dd, 1H, *J* = 5.7, 10.7 Hz), 5.11 (m, 1H), 4.17 (m, 2H), 3.55 (m, 2H), 1.53-1.44 (m, 1H), 1.45-1.31 (m, 3H), 1.16-1.04 (m, 21H), 0.94 (s, 6H); <sup>13</sup>C NMR (125 MHz, CDCl<sub>3</sub>) δ 201.6, 102.8, 93.6, 63.7, 62.4, 39.0, 34.4, 28.4, 28.3, 18.2, 12.2; IR (ATR) ν = 3345, 2956, 2941, 2892, 2865, 1463 cm<sup>-1</sup>; HRMS (ESI) *m/z* calcd for C<sub>19</sub>H<sub>38</sub>O<sub>2</sub>SiNa [(M+Na)<sup>+</sup>] 349.2533, found 349.2524.

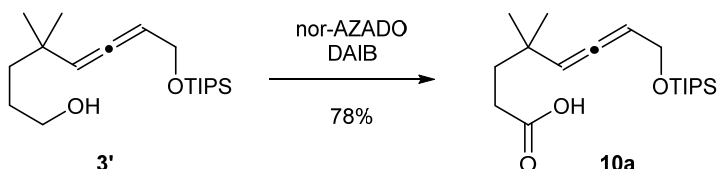

**Compound 10a:** To a solution of alcohol **3'** (99.3 mg, 0.304 mmol) in CH<sub>2</sub>Cl<sub>2</sub>-pH 7 phosphate buffer (1:1, 3.0 mL) were added nor-AZADO (10.0 mg, 0.0724 mmol) and PhI(OAc)<sub>2</sub> (211 mg, 0.655 mmol) at 0 °C. After the reaction mixture was stirred for 7 h at room temperature, additional PhI(OAc)<sub>2</sub> (40.6 mg, 0.126 mmol) was added. The solution was stirred for 2 h. The reaction was then quenched with 10% aq. Na<sub>2</sub>S<sub>2</sub>O<sub>3</sub>. The mixture was extracted with CHCl<sub>3</sub> three times and dried over Na<sub>2</sub>SO<sub>4</sub>. The filtrate was concentrated under reduced pressure and the residue was purified by silica gel column chromatography (10-35% EtOAc/hexane) to afford **10a** as a colorless oil (80.2 mg, 78%): <sup>1</sup>H NMR (500 MHz, CDCl<sub>3</sub>) δ 5.34 (dd, 1H, *J* = 6.0, 12.2 Hz), 5.09 (m, 1H), 4.25 (m, 2H), 2.36 (t, 2H, *J* = 8.6 Hz), 1.68 (t, 2H, *J* = 8.3 Hz), 1.14-1.04 (m, 21H), 1.03 (s, 6H); <sup>13</sup>C NMR (125 MHz, CDCl<sub>3</sub>) δ 201.7, 180.8, 102.0, 94.2, 62.2, 37.4, 34.6, 30.2, 27.9, 27.7, 18.2, 12.2; IR (ATR) ν = 2959, 2942, 2892, 2865, 1711 cm<sup>-1</sup>; HRMS (ESI) *m/z* calcd for C<sub>19</sub>H<sub>36</sub>O<sub>3</sub>SiNa [(M+Na)<sup>+</sup>] 363.2326, found 363.2325.

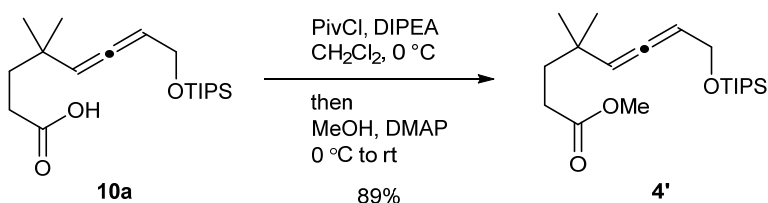

**Compound 4':** To a mixed solution of carboxylic acid **10a** (80.2 mg, 0.236 mmol) and DIPEA (0.098 mL, 0.565 mmol) in CH<sub>2</sub>Cl<sub>2</sub> (2.4 mL) was added PivCl (0.035 mL, 0.283 mmol) dropwise 0 °C for 5 min. After 5 min, MeOH (0.029 mL, 0.707 mmol) and DMAP (5.6 mg, 0.0458 mmol) were added. The solution was stirred at room temperature overnight. The reaction was then quenched with satd. aq. NaHCO<sub>3</sub> at 0 °C and extracted with CHCl<sub>3</sub> three times. The combined organic layers were dried over Na<sub>2</sub>SO<sub>4</sub>, filtered, and concentrated. The residue was purified by silica gel column chromatography (3-7% EtOAc/hexane) to afford **4'** (74.0 mg, 89%) as a colorless oil: <sup>1</sup>H NMR (500 MHz, CDCl<sub>3</sub>) δ 5.25 (1H, dd, *J* = 6.6, 12.6 Hz), 5.01 (m, 1H), 4.16 (m, 2H),

3.59 (s, 3H), 2.24 (t, 2H,  $J = 8.3$  Hz), 1.59 (t, 2H,  $J = 8.3$  Hz), 1.06-0.96 (m, 21H), 0.94 (s, 6H);  $^{13}\text{C}$  NMR (125 MHz,  $\text{CDCl}_3$ )  $\delta$  201.4, 174.6, 101.8, 93.8, 61.9, 51.5, 37.5, 34.3, 29.9, 27.6, 27.4, 26.4, 17.9, 11.9; IR (ATR)  $\nu = 3000, 1770, 1757, 1749, 1245\text{ cm}^{-1}$ ; HRMS (ESI)  $m/z$  calcd for  $\text{C}_{20}\text{H}_{38}\text{O}_3\text{SiNa}$   $[(\text{M}+\text{Na})^+]$  377.2482, found 377.2500.

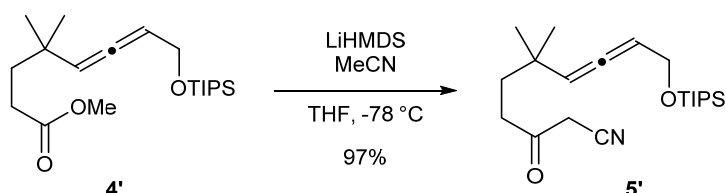

**Compound 5'**: To a solution of LiHMDS (1.3 M in THF, 0.288 mL, 0.374 mmol) in THF (1.9 mL) was added MeCN (0.020 mL, 0.374 mmol) dropwise at  $-78\text{ }^\circ\text{C}$ . After 30 min, methyl ester **4'** in THF (25 mL) was added dropwise via dropping funnel at  $-78\text{ }^\circ\text{C}$ . The resultant solution was stirred for at  $-78\text{ }^\circ\text{C}$  for 5 min. After the solution was diluted with  $\text{Et}_2\text{O}$ , 1 M aq. HCl and satd. aq.  $\text{NH}_4\text{Cl}$  were added. The mixture was extracted with  $\text{Et}_2\text{O}$  three times. The combined organic layers were washed with brine, dried over  $\text{Na}_2\text{SO}_4$ , filtered and concentrated under reduced pressure. The residue was purified by silica gel column chromatography (7%-20% EtOAc/hexane) to afford **5'** as a colorless oil (65.9 mg, 97%):  $^1\text{H}$  NMR (500 MHz,  $\text{CDCl}_3$ )  $\delta$  5.33 (dd, 1H  $J = 6.3, 11.9$  Hz), 5.05 (m, 1H), 4.23 (m, 2H), 3.47 (s, 2H), 2.59 (m, 2H), 1.64 (m, 2H), 1.15-1.03 (m, 21H), 1.02 (s, 3H), 1.00 (s, 3H);  $^{13}\text{C}$  NMR (125 MHz,  $\text{CDCl}_3$ )  $\delta$  201.4, 197.7, 113.7, 101.6, 94.1, 61.8, 38.1, 35.5, 34.2, 31.9, 28.1, 27.3, 17.9, 11.9; IR (ATR)  $\nu = 3734, 2989, 1770, 1758, 1733, 1245, 1053\text{ cm}^{-1}$ ; HRMS (ESI)  $m/z$  calcd for  $\text{C}_{21}\text{H}_{37}\text{NO}_2\text{SiNa}$   $[(\text{M}+\text{Na})^+]$  386.2486, found 386.2486.

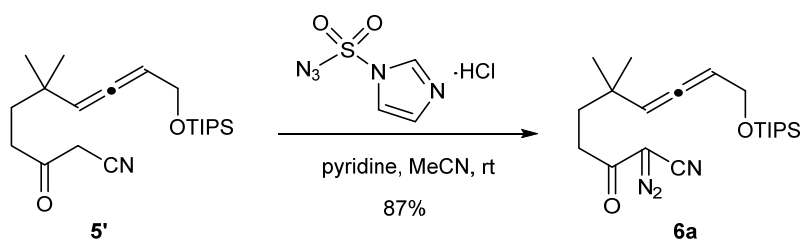

**Compound 6a**: To a solution of **5'** (58.7 mg, 0.161 mmol) in MeCN (1.6 mL) were added pyridine (47 mL, 0.581 mmol) and imidazole-1-sulfonylazide (33.5 mg, 0.193 mmol) at room temperature. After stirring overnight, an additional pyridine (13  $\mu\text{L}$ , 0.161 mmol) and imidazole-1-sulfonylazide (28.6 mg, 0.164 mmol) were added to the reaction mixture. After stirring for 6 h, the reaction was quenched with satd. aq.  $\text{NH}_4\text{Cl}$ , and the resultant mixture was extracted with EtOAc three times. The combined organic layers were washed with brine, dried over  $\text{Na}_2\text{SO}_4$ , and filtered. The filtrate was concentrated and the residue was purified by silica gel column chromatography (3%-10%

EtOAc/hexane) to afford **6a** as a yellowish oil (54.5 mg, 87%):  $^1\text{H NMR}$  (500 MHz,  $\text{CDCl}_3$ )  $\delta$  5.35 (dd, 1H,  $J = 6.6, 12.5$  Hz), 5.07 (m, 1H), 4.29-4.19 (m, 2H), 2.60 (t, 2H,  $J = 7.7$  Hz), 1.69 (t, 2H,  $J = 7.7$  Hz), 1.19-1.04 (m, 21H), 1.03 (s, 3H), 1.02 (s, 3H);  $^{13}\text{C NMR}$  (125 MHz,  $\text{CDCl}_3$ )  $\delta$  201.4, 190.5, 108.4, 101.5, 94.2, 61.9, 36.6, 35.6, 34.5, 27.9, 27.3, 17.9, 11.9; IR (ATR)  $\nu = 3734, 3000, 1758, 1244, 1055$   $\text{cm}^{-1}$ ; HRMS (ESI)  $m/z$  calcd for  $\text{C}_{21}\text{H}_{35}\text{N}_3\text{O}_2\text{SiNa}$   $[(\text{M}+\text{Na})^+]$  412.2391, found 412.2403.

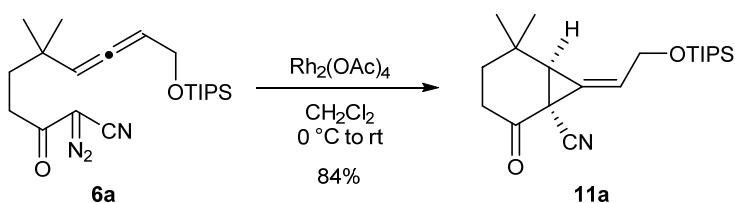

**Compound 11a:** To a solution of **6a** (51.3 mg, 0.132 mmol) in  $\text{CH}_2\text{Cl}_2$  (2.6 mL) was added  $\text{Rh}_2(\text{OAc})_4$  (3.3 mg, 7.47  $\mu\text{mol}$ ) at  $0\text{ }^\circ\text{C}$ . The solution was stirred at room temperature for 30 min. The resulting solution was concentrated, and purified by silica gel column chromatography (7-15% EtOAc/hexane) to afford **11a** as a colorless oil (40.1 mg, 84%):  $^1\text{H NMR}$  (500 MHz,  $\text{CDCl}_3$ )  $\delta$  6.42 (dt, 1H,  $J = 2.6, 6.0$  Hz), 4.44 (m, 2H), 2.76 (s, 1H), 2.32 (dd, 2H  $J = 4.3, 9.2$  Hz), 1.76-1.57 (m, 1H), 1.40-1.34 (m, 1H), 1.23 (s, 3H), 1.20 (s, 3H), 1.14-0.98 (m, 21H);  $^{13}\text{C NMR}$  (125 MHz,  $\text{CDCl}_3$ )  $\delta$  197.5, 126.0, 122.0, 116.7, 62.3, 42.8, 32.7, 30.8, 30.6, 29.1, 27.6, 25.1, 17.9, 11.8; IR (ATR)  $\nu = 3734, 2992, 1770, 1758, 1702, 1246$   $\text{cm}^{-1}$ ; HRMS (ESI)  $m/z$  calcd for  $\text{C}_{21}\text{H}_{36}\text{NO}_2\text{Si}$   $[(\text{M}+\text{H})^+]$  362.2510, found 362.2520.

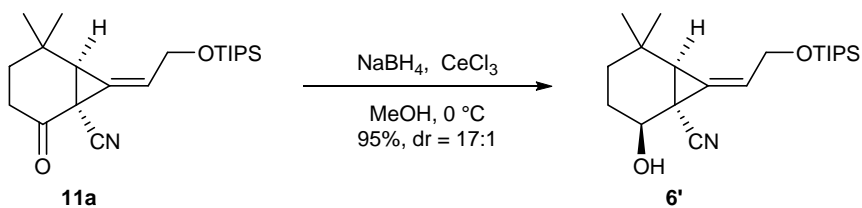

**Compound 6':** To a solution of **11a** (33.7 mg, 0.0932 mmol) in MeOH (1.9 mL) were added  $\text{CeCl}_3 \cdot 7\text{H}_2\text{O}$  (41.1 mg, 0.110 mmol) and  $\text{NaBH}_4$  (5.4 mg, 0.143 mmol) at  $0\text{ }^\circ\text{C}$ . After stirring for 5 min, the reaction was quenched with water, and the resultant solution was extracted with ether three times. The combined organic layers were washed with brine, dried over  $\text{Na}_2\text{SO}_4$ , filtered and concentrated under reduced pressure. The residue was purified by silica gel column chromatography (10%-15% EtOAc/hexane) to afford **6'** as a white solid (32.1 mg, 95%, dr = 17:1):  $^1\text{H NMR}$  (500 MHz,  $\text{CDCl}_3$ )  $\delta$  6.23 (s, 1H), 4.37 (d, 2H,  $J = 6.0$  Hz), 4.11 (s, 1H), 2.26 (br, OH), 2.18 (s, 1H), 1.56-1.48 (m, 1H), 1.44 (t, 1H,  $J = 13.5$  Hz), 1.24 (s, 3H), 1.06 (s, 18H), 1.16-1.03 (m, 5H), 1.01 (s, 3H);  $^{13}\text{C NMR}$  (125 MHz,  $\text{CDCl}_3$ )  $\delta$  124.3, 123.1, 64.3, 62.7, 35.1, 30.7, 30.0, 29.5,

29.4, 25.9, 18.3, 17.9, 17.9, 11.9; IR (ATR)  $\nu = 2994, 2950, 1770, 1758, 1375, 1245, 1057 \text{ cm}^{-1}$ ;  
 HRMS (ESI)  $m/z$  calcd for  $\text{C}_{21}\text{H}_{37}\text{NO}_2\text{SiNa} [(M+\text{Na})^+]$  386.2486, found 386.2469.

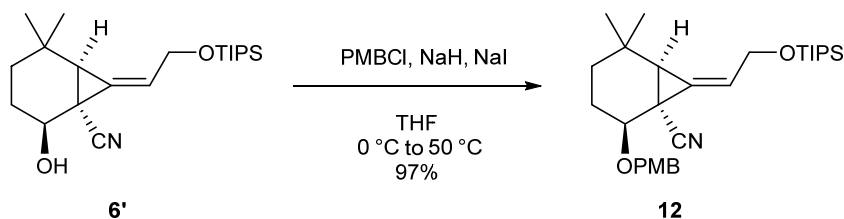

**Compound 12:** To a solution of **S6** (6.19 g, 17.0 mmol) in THF (170 mL) was added NaH (60% in mineral oil, 921 mg, 23.0 mmol) slowly at 0 °C. After the reaction mixture was stirred at 0 °C for 30 min, PMBCl (3.5 mL, 25.5 mmol) and NaI (777 mg, 5.18 mmol) were added. The mixture was then stirred at 50 °C for 12 h. The reaction was quenched with satd. aq.  $\text{NH}_4\text{Cl}$  at 0 °C, and the resultant mixture was extracted with EtOAc three times. The combined organic layers were washed with brine, dried over  $\text{Na}_2\text{SO}_4$ , filtered and concentrated. The residue was purified by silica gel column chromatography (3-15 % EtOAc/hexane) to afford **12** as a colorless oil (8.09 g, 97%):  $^1\text{H}$  NMR (500 MHz,  $\text{CDCl}_3$ )  $\delta$  7.37 (d, 2H,  $J = 8.3\text{ Hz}$ ), 6.90 (d, 2H,  $J = 8.3 \text{ Hz}$ ), 6.21 (s, 1H), 4.67 (d, 1H,  $J = 11.5 \text{ Hz}$ ), 4.60 (d, 1H,  $J = 11.5 \text{ Hz}$ ), 4.36 (s, 2H), 3.81 (s, 3H), 3.74 (s, 1H), 2.15 (s, 1H), 1.47-1.36 (m, 2H), 1.22 (s, 3H), 1.15-0.91 (m, 23H), 1.00 (s, 3H);  $^{13}\text{C}$  NMR (125 MHz,  $\text{CDCl}_3$ )  $\delta$  159.2, 129.9, 129.4, 124.7, 123.1, 120.7, 113.8, 71.4, 71.2, 62.7, 55.2, 35.2, 30.6, 30.4, 29.6, 29.5, 22.8, 17.9, 17.0, 11.9; IR (ATR)  $\nu = 2994, 2866, 1770, 1758, 1513, 1246 \text{ cm}^{-1}$ ; HRMS (ESI)  $m/z$  calcd for  $\text{C}_{29}\text{H}_{45}\text{NO}_3\text{Si} [(M+\text{Na})^+]$  506.3061, found 506.3051.

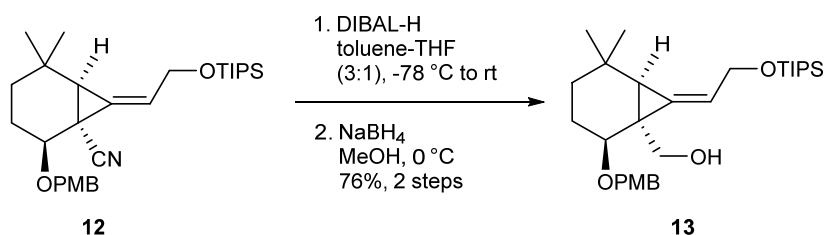

**Compound 13:** To a solution of **12** (27 mg, 56.2  $\mu\text{mol}$ ) in toluene-THF (3:1, 1 mL) was added slowly DIBAL-H (1.0 M solution in toluene, 112  $\mu\text{L}$ , 112  $\mu\text{mol}$ ) at  $-78 \text{ }^\circ\text{C}$ . The solution was warmed up to room temperature gradually. After the starting material completely consumed, acetone (100  $\mu\text{L}$ ), EtOAc (100  $\mu\text{L}$ ), and pH 7 phosphate buffer (100  $\mu\text{L}$ ) were added to the solution. The resulting mixture was stirred for 20 min vigorously.  $\text{Na}_2\text{SO}_4$  was then added and the mixture was stirred for 30 min. After filtration through  $\text{Na}_2\text{SO}_4$  and silica gel, the filtrate was concentrated to afford aldehyde as a colorless oil (26 mg, crude), which was used for the next reaction without further purification:  $^1\text{H}$  NMR (500 MHz,  $\text{CDCl}_3$ )  $\delta$  9.23 (s, 1H), 7.31 (d, 2H,  $J = 8.3 \text{ Hz}$ ), 6.88 (d, 2H,  $J = 8.0 \text{ Hz}$ ), 5.90 (s, 1H), 4.60 (d, 1H,  $J = 11.5 \text{ Hz}$ ), 4.53 (d, 1H,  $J = 11.2 \text{ Hz}$ ), 4.36 (d, 2H,  $J$

=6.0 Hz), 4.22 (s, 1H), 3.81 (s, 3H), 2.22 (s, 1H), 1.69-1.60 (m, 1H), 1.55 (t, 1H,  $J = 14.3$  Hz), 1.19 (s, 3H), 1.14-1.00 (m, 23H), 1.05 (s, 3H); IR (ATR)  $\nu = 2942, 2865, 2725, 1769, 1758, 1710, 1613, 1513$   $\text{cm}^{-1}$ ; HRMS (ESI)  $m/z$  calcd for  $\text{C}_{29}\text{H}_{46}\text{O}_4\text{SiNa}$   $[(\text{M}+\text{Na})^+]$  509.3058, found 509.3040. To a solution of the above aldehyde (26 mg, crude) in MeOH (1 mL) was added  $\text{NaBH}_4$  (2.6 mg,  $68.7$   $\mu\text{mol}$ ) at  $0$   $^\circ\text{C}$ . The reaction mixture was stirred at  $0$   $^\circ\text{C}$  for 10 min. After addition of water, the mixture was extracted with  $\text{Et}_2\text{O}$  three times and washed with brine. The combined organic layers were dried over  $\text{Na}_2\text{SO}_4$ , filtered, concentrated, and purified by silica gel column chromatography (3-15 % EtOAc/hexane) to afford **13** as a colorless oil (21 mg, 76%, 2 steps):  $^1\text{H}$  NMR (500 MHz,  $\text{CDCl}_3$ )  $\delta$  7.29 (d, 2H,  $J = 8.3$  Hz), 6.90 (d, 2H,  $J = 8.3$  Hz), 5.83 (s, 1H), 4.60 (d, 1H,  $J = 11.2$  Hz), 4.38 (d, 1H,  $J = 11.2$  Hz), 4.34-4.26 (m, 2H), 3.97 (d, 1H,  $J = 11.5$  Hz), 3.92 (br, OH), 3.81 (s, 3H), 3.21 (d, 1H,  $J = 10.0$  Hz), 3.00 (t, 1H,  $J = 10.9$  Hz), 1.72-1.56 (m, 2H), 1.47-1.38 (m, 2H), 1.26 (s, 1H), 1.19 (s, 3H), 1.15-0.77 (m, 21H), 0.98 (s, 3H);  $^{13}\text{C}$  NMR (125 MHz,  $\text{CDCl}_3$ )  $\delta$  159.2, 131.3, 130.2, 129.3, 118.7, 113.9, 75.9, 75.8, 70.5, 68.3, 63.6, 55.2, 31.8, 31.1, 29.9, 29.2, 29.2, 22.6, 18.0, 12.0; IR (ATR)  $\nu = 3537, 2941, 2864, 1613, 1513, 1462, 1248$   $\text{cm}^{-1}$ ; HRMS (ESI)  $m/z$  calcd for  $\text{C}_{29}\text{H}_{49}\text{O}_4\text{Si}$   $[(\text{M}+\text{H})^+]$  511.3214, found 511.3196.

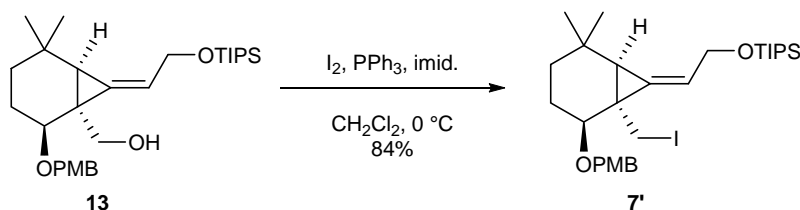

**Compound 7'**: To a solution of imidazole (642 mg, 9.43 mmol) and  $\text{PPh}_3$  (834 mg, 3.18 mmol) in  $\text{CH}_2\text{Cl}_2$  (7.8 mL) was added  $\text{I}_2$  (854 mg, 3.36 mmol) at  $0$   $^\circ\text{C}$  in dark. An alcohol **13** in  $\text{CH}_2\text{Cl}_2$  (7.8 mL) was then added to the mixture through cannula after stirred for 5 min. The reaction mixture was stirred at  $0$   $^\circ\text{C}$  in dark for 20 min. the resulting mixture was quenched with satd. aq.  $\text{Na}_2\text{S}_2\text{O}_3$  and extracted with  $\text{CHCl}_3$  three times. The combined organic layers were dried over  $\text{Na}_2\text{SO}_4$ , filtered and concentrated. The residue was purified by silica gel column chromatography (3-10% EtOAc/hexane) to afford alkyl iodide **7'** as a yellowish oil (785 mg, 84%):  $^1\text{H}$  NMR (500 MHz  $\text{CDCl}_3$ )  $\delta$  7.36 (d, 2H,  $J = 8.3$  Hz), 6.90 (d, 2H,  $J = 8.3$  Hz), 6.14 (s, 1H), 4.56 (d, 1H,  $J = 10.9$  Hz), 4.46 (d, 2H,  $J = 10.6$  Hz), 4.34 (d, 1H,  $J = 8.6$  Hz), 3.91 (s, 1H), 3.81 (s, 3H), 2.82 (d,  $J = 8.9$  Hz), 1.69-1.41 (m, 2H), 1.43 (s, 1H), 1.16-0.97 (m, 1H), 0.91-0.75 (m, 1H), 1.13 (s, 3H), 1.12-0.98 (m, 21H), 0.93 (s, 3H);  $^{13}\text{C}$  NMR (125 MHz,  $\text{CDCl}_3$ )  $\delta$  159.0, 133.0, 131.0, 129.5, 117.8, 113.7, 72.3, 71.3, 63.3, 55.2, 36.5, 32.7, 31.3, 30.5, 29.4, 28.2, 21.7, 18.0, 17.7, 12.0; IR (ATR)  $\nu = 2942, 2864, 1770, 1614, 1514, 1464, 1247, 1219$   $\text{cm}^{-1}$ ; HRMS (ESI)  $m/z$  calcd for  $\text{C}_{29}\text{H}_{47}\text{O}_3\text{SiNa}$   $[(\text{M}+\text{Na})^+]$  621.2231, found 621.2220.

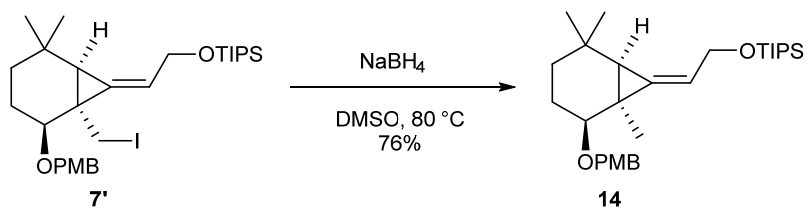

**Compound 14:** To a solution of alkyl iodide **7'** (17.7 mg, 29.6  $\mu\text{mol}$ ) in DMSO (100  $\mu\text{L}$ ) was added NaBH<sub>4</sub> (2.2 mg, 58.2  $\mu\text{mol}$ ). The solution was stirred at 80 °C for 1 h. The reaction was quenched with satd. aq. NH<sub>4</sub>Cl at room temperature. After 30 min, the resultant mixture was extracted with Et<sub>2</sub>O three times. The combined organic layers were washed with brine, dried over Na<sub>2</sub>SO<sub>4</sub>, filtered and concentrated. The residue was purified by silica gel column chromatography (1-7% EtOAc/hexane) to afford **14** (11.5 mg, 76%) as a colorless oil: <sup>1</sup>H NMR (500 MHz, CDCl<sub>3</sub>)  $\delta$  7.30 (d, 2H, *J* = 8.3 Hz), 6.88 (d, 2H, *J* = 8.3 Hz), 5.82 (s, 1H), 4.55 (d, 1H, *J* = 11.5 Hz), 4.37 (d, 1H, *J* = 11.7 Hz), 4.36-4.26 (m, 2H), 3.81 (s, 3H), 3.57 (s, 1H), 1.52-1.40 (m, 2H), 1.37-1.28 (m, 1H), 1.26 (s, 1H), 1.19 (s, 3H), 1.14 (s, 3H), 1.13-1.00 (m, 21H), 0.99-0.79 (m, 1H), 0.92 (s, 3H); <sup>13</sup>C NMR (125 MHz, CDCl<sub>3</sub>)  $\delta$  158.9, 136.1, 131.4, 129.0, 117.2, 113.6, 74.7, 70.6, 63.9, 55.2, 33.6, 32.7, 31.3, 30.2, 29.7, 23.3, 22.5, 21.4, 18.0, 12.0; IR (ATR)  $\nu$  = 2993, 1770, 1373, 1245 cm<sup>-1</sup>; HRMS (ESI) *m/z* calcd for C<sub>29</sub>H<sub>48</sub>O<sub>3</sub>SiNa [(M+Na)<sup>+</sup>] 495.3265, found 495.3249.

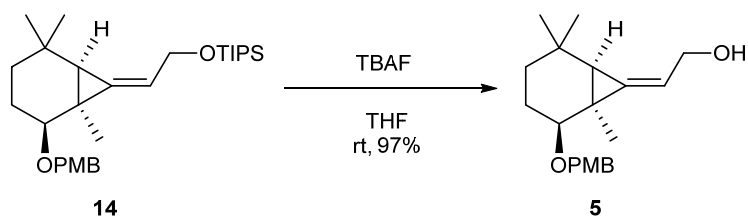

**Compound 5:** To a solution of **14** (486 mg, 1.03 mmol) in THF (10 mL) was added TBAF (1.0 M in THF) at room temperature. The solution was stirred for 1 h, and then diluted with EtOAc and satd. aq. NH<sub>4</sub>Cl, extracted with EtOAc three times. The combined organic layers were washed with brine, dried over Na<sub>2</sub>SO<sub>4</sub>, filtered and concentrated. The residue was purified by silica gel column chromatography to afford **5** (313 mg, 97%) as a colorless oil; <sup>1</sup>H NMR (500 MHz, CDCl<sub>3</sub>)  $\delta$  7.30 (d, 2H, *J* = 8.3 Hz), 6.89 (d, 2H, *J* = 8.3 Hz), 5.88 (t, 1H, *J* = 6.0 Hz), 4.56 (d, *J* = 11.5 Hz), 4.37 (d, *J* = 11.5 Hz), 4.24 (m, 2H), 3.58 (t, 1H, *J* = 3.3 Hz), 1.53-1.45 (m, 1H), 1.35-1.24 (m, 2H), 1.22 (s, 1H), 1.20 (s, 3H), 1.16 (s, 3H), 0.98 (m, 1H), 0.96 (s, 3H); <sup>13</sup>C NMR (125 MHz, CDCl<sub>3</sub>)  $\delta$  158.9, 131.1, 128.9, 113.7, 74.9, 71.7, 63.3, 55.2, 36.5, 33.4, 33.0, 29.6, 29.0, 28.4, 26.7, 24.4, 23.8, 20.4; IR (ATR)  $\nu$  = 3407, 2992, 2953, 2861, 1768, 1756 cm<sup>-1</sup>; HRMS (ESI) *m/z* calcd for C<sub>20</sub>H<sub>28</sub>O<sub>3</sub>Na [(M+Na)<sup>+</sup>] 339.1931, found 339.1927.

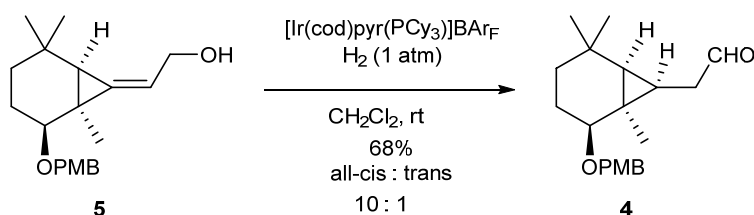

**Compound 4:** To a solution of **5** (41 mg, 0.132 mmol) in  $\text{CH}_2\text{Cl}_2$  (2.6 mL) was added  $[\text{Ir}(\text{cod})(\text{pyr})(\text{PCy}_3)]\text{BARF}$  (2.4 mg, 1.58  $\mu\text{mol}$ ) at room temperature. After the reaction mixture was bubbled with  $\text{H}_2$  gas via needle for 3 min, the orange solution turned yellow. After 5 min, additional  $[\text{Ir}(\text{cod})(\text{pyr})(\text{PCy}_3)]\text{BARF}$  (4.7 mg, 3.08  $\mu\text{mol}$ ) was added and  $\text{H}_2$  gas was bubbled for 1 min. After the starting material was completely consumed,  $\text{Et}_3\text{N}$  (two drops) was added, and the solution was concentrated. The residue was purified by silica gel column chromatography (7-20%  $\text{EtOAc}$ /hexane) to afford **4** (28 mg, 68%, dr = 10:1) as a colorless oil:  $^1\text{H}$  NMR (500 MHz,  $\text{CDCl}_3$ )  $\delta$  9.77 (s, 1H), 7.28 (d, 2H,  $J = 8.3$  Hz), 6.87 (d, 2H,  $J = 8.3$  Hz), 4.54 (d, 1H,  $J = 11.7$  Hz), 4.40 (d, 1H,  $J = 11.7$  Hz), 3.79 (3H, s), 3.05 (dd, 1H,  $J = 11.7, 4.3$  Hz), 2.65 (dd, 1H,  $J = 17.9, 6.2$  Hz), 2.43 (dd, 1H,  $J = 17.9, 8.9$  Hz), 1.66-1.59 (m, 1H), 1.48 (dd, 1H,  $J = 25.6, 13.6$  Hz), 1.35 (d, 1H,  $J = 14.0$  Hz), 1.24 (s, 3H), 1.11 (d, 1H,  $J = 7.7$  Hz), 1.10 (s, 3H), 0.94-0.84 (m, 1H), 0.92 (s, 3H), 0.50 (d, 1H,  $J = 9.5$  Hz);  $^{13}\text{C}$  NMR (125 MHz,  $\text{CDCl}_3$ )  $\delta$  201.7, 128.8, 128.7, 114.0, 113.4, 73.9, 71.6, 55.3, 40.0, 36.4, 33.1, 32.6, 29.2, 28.6, 26.6, 23.3, 21.0, 20.5; IR (ATR)  $\nu = 3369, 2957, 2864, 2718, 1725, 1613, 1512$   $\text{cm}^{-1}$ ; HRMS (ESI)  $m/z$  calcd for  $\text{C}_{20}\text{H}_{28}\text{O}_3\text{Na}$   $[(\text{M}+\text{Na})^+]$  339.1931, found 339.1937. The same procedure was applied to a gram-scale synthesis of compound **4** (1.07 g, 78%, dr 9.5:1).

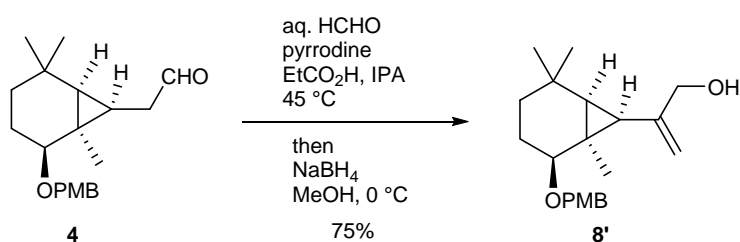

**Compound 8':** To a solution of aldehyde **4** (57.9 mg, 0.183 mmol) in 2-propanol (1.8 mL) were added 37% aq. HCHO (16.3  $\mu\text{L}$ , 0.201 mmol), pyrrolidine (7.5  $\mu\text{L}$ , 0.0913 mmol) and propionic acid (7.8  $\mu\text{L}$ , 0.0913 mmol) at room temperature. The mixture was stirred at 45 °C for 24 h. MeOH (1.8 mL) and  $\text{NaBH}_4$  (10.4 mg, 0.275 mmol) were added to the resulting solution at 0 °C, and the mixture was stirred at 0 °C for 20 min. The reaction was then quenched with satd. aq.  $\text{NH}_4\text{Cl}$  and extracted with  $\text{EtOAc}$  three times. The combined organic layers were washed with brine, dried over  $\text{Na}_2\text{SO}_4$  and filtered. The filtrate was concentrated and the residue was purified by silica gel column chromatography (7-20%  $\text{EtOAc}$ /hexane) to afford **8'** (45.2 mg, 75%) as a colorless oil:  $^1\text{H}$  NMR

(500 MHz, CDCl<sub>3</sub>) δ 7.27 (d, 2H, *J* = 8.3 Hz), 6.87 (d, 2H, *J* = 8.3 Hz), 5.25 (s, 1H), 4.99 (s, 1H), 4.49 (d, 1H, *J* = 11.5 Hz), 4.44 (d, 1H, *J* = 11.5 Hz), 4.03 (d, 1H, *J* = 14.3 Hz), 3.92 (d, 1H, *J* = 14.3 Hz), 3.80 (s, 3H), 3.31 (dd, 1H, *J* = 9.7, 4.9 Hz), 1.65-1.62 (m, 2H), 1.58-1.50 (m, 1H), 1.29-1.24 (m, 1H), 1.18-1.13 (m, 1H), 1.26 (s, 3H), 1.14 (s, 3H), 1.11 (s, 3H), 0.71 (d, 1H, *J* = 9.5 Hz); <sup>13</sup>C NMR (125 MHz, CDCl<sub>3</sub>) δ 158.9, 145.6, 131.1, 129.0, 113.6, 111.8, 74.2, 71.2, 67.3, 60.3, 55.2, 37.5, 34.0, 33.0, 32.1, 30.2, 29.8, 25.3, 24.4, 22.8, 21.0, 14.1; IR (ATR) ν = 3421, 2950, 2864, 1738, 1613, 1512, 1244 cm<sup>-1</sup>; HRMS (ESI) *m/z* calcd for C<sub>21</sub>H<sub>30</sub>O<sub>3</sub>Na [(M+Na)<sup>+</sup>] 353.2087, found 353.2072.

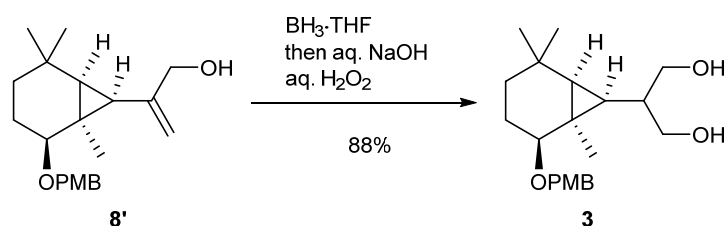

**Compound 3:** To a solution of alkene **8'** (273 mg, 0.827 mmol) in THF (8.3 mL) was added BH<sub>3</sub>·THF (1.0M in THF, 910 μL, 0.910 mmol) at 0 °C dropwise. The solution was stirred at room temperature for 20 min. Additional BH<sub>3</sub>·THF (750 μL, 0.750 mmol) was added to 0 °C, and the resultant solution was stirred for 50 min at room temperature. 3M aq. NaOH (1.7 mL) and 30% H<sub>2</sub>O<sub>2</sub> (563 μL) were then added at 0 °C. The resultant mixture was stirred at room temperature for 15 min. The reaction was quenched with satd. aq. NH<sub>4</sub>Cl at 0 °C, and the mixture was extracted with EtOAc three times. The combined organic layers were washed with brine, dried over Na<sub>2</sub>SO<sub>4</sub>, filtered and concentrated under reduced pressure. The residue was purified by silica gel column chromatography (35-55% EtOAc/hexane) to afford **3** as a colorless oil (255 mg, 88%): <sup>1</sup>H NMR (500 MHz, CDCl<sub>3</sub>) δ 7.31 (d, 2H, *J* = 8.6 Hz), 6.90 (d, 2H, *J* = 8.6 Hz), 4.55 (dd, 2H, *J* = 25.5, 11.5 Hz), 4.06 (br, 1H), 3.87-3.73 (m, 4H), 3.72-3.64 (m, 1H), 3.60 (t, 1H, *J* = 8.9 Hz), 3.20 (dd, 1H, *J* = 11.5, 4.0 Hz), 2.43 (br, OH), 2.09 (br, OH), 1.77-1.64 (m, 2H), 1.53-1.35 (m, 2H), 1.15 (s, 3H), 1.11 (s, 3H), 1.05 (s, 3H), 1.02-0.82 (m, 1H), 0.40 (d, 1H, *J* = 9.2 Hz), 0.18 (t, 1H, 11.2 Hz); <sup>13</sup>C NMR (125 MHz, CDCl<sub>3</sub>) δ 159.0, 130.9, 129.0, 128.8, 113.7, 75.1, 71.2, 68.7, 67.3, 55.2, 38.5, 36.7, 33.7, 33.3, 30.1, 29.9, 26.5, 25.8, 24.1, 20.6; IR (ATR) ν = 3369, 2953, 2864, 1737, 1613, 1512, 1244 cm<sup>-1</sup>; HRMS (ESI) *m/z* calcd for C<sub>21</sub>H<sub>32</sub>O<sub>4</sub>Na [(M+Na)<sup>+</sup>] 371.2193, found 371.2192.

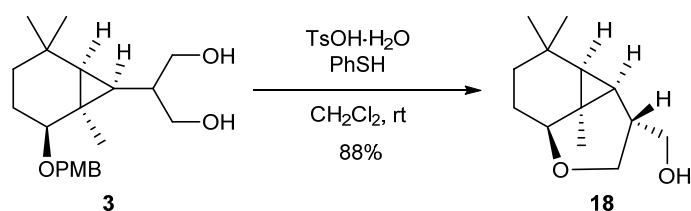



**Compound 18:** To a solution of diol **3** (21 mg, 0.0606 mmol) in CH<sub>2</sub>Cl<sub>2</sub> (1.2 mL) were added PhSH (62 μL, 0.606 mmol) and TsOH·H<sub>2</sub>O (0.0195 mmol) at room temperature. The solution was stirred for 6 h. The reaction was quenched with satd. aq. NaHCO<sub>3</sub>, and the resultant mixture was extracted with EtOAc three times. The combined organic layers were washed with brine, dried over Na<sub>2</sub>SO<sub>4</sub>, filtered and concentrated under reduced pressure. The residue was purified by silica gel column chromatography (15-60% EtOAc/hexane) to afford **18** as a colorless oil (11 mg, 88%): <sup>1</sup>H NMR (500 MHz, CDCl<sub>3</sub>) δ 4.11 (s, 1H), 3.73 (dd, 1H, *J* = 3.7, 10.0 Hz), 3.67 (dd, 1H, *J* = 6.0, 10.9 Hz), 3.56 (t, 1H, *J* = 8.3 Hz), 2.99 (t, 1H, *J* = 10.6 Hz), 1.88-1.79 (m, 1H), 1.55-1.42 (m, 3H), 1.39-1.31 (m, 1H), 1.17 (s, 3H), 1.05 (s, 6H), 1.02-0.98 (m, 1H), 0.49 (dd, 1H, *J* = 6.3, 8.9 Hz), 0.36 (d, 1H, *J* = 9.2 Hz); <sup>13</sup>C NMR (125 MHz, CDCl<sub>3</sub>) δ 71.8, 65.3, 64.0, 34.6, 32.5, 31.0, 29.4, 29.0, 28.5, 28.0, 27.0, 25.3; IR (ATR) ν = 3423, 2994, 1770, 1463, 1381, 1245 cm<sup>-1</sup>; HRMS (ESI) *m/z* calcd for C<sub>13</sub>H<sub>22</sub>O<sub>2</sub>Na [(M+Na)<sup>+</sup>] 211.1693, found 211.1688.

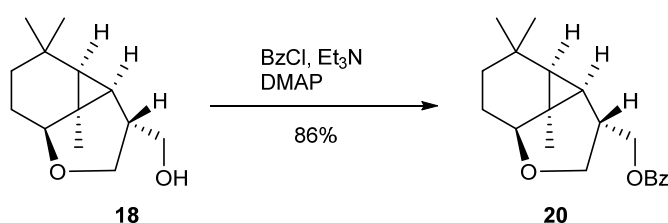

**Compound 20:** To a solution of alcohol **18** (253 mg, 1.21 mmol) in CH<sub>2</sub>Cl<sub>2</sub> (24 mL) were added Et<sub>3</sub>N (676 μL, 4.86 mmol), DMAP (78.0 mg, 0.638 mmol) and BzCl (282 μL, 2.43 mmol) at room temperature. The solution was stirred for 1 h. The reaction was quenched with satd. aq. NaHCO<sub>3</sub>, and the resultant mixture was extracted with CHCl<sub>3</sub> three times. The combined organic layers were dried over Na<sub>2</sub>SO<sub>4</sub>, filtered and concentrated. The residue was purified by silica gel column chromatography (3-5% EtOAc/hexane) to afford **20** as a colorless oil (327 mg, 86%): <sup>1</sup>H NMR (500 MHz, CDCl<sub>3</sub>) δ 8.04 (d, 2H, *J* = 8.3 Hz), 7.55 (t, 1H, *J* = 7.2 Hz), 7.43 (t, 2H, *J* = 7.6 Hz), 4.34 (dd, 1H, *J* = 6.3, 10.9 Hz), 4.18 (dd, 1H, *J* = 7.7, 10.7 Hz), 4.13 (s, 1H), 3.76 (dd, 1H, *J* = 3.4, 10.0 Hz), 3.07 (t, 1H, *J* = 10.5 Hz), 2.18-2.06 (m, 1H), 1.57-1.47 (m, 1H), 1.43-1.31 (m, 1H), 1.18 (s, 3H), 1.07 (s, 3H), 1.05 (s, 3H), 1.06-0.99 (m, 1H), 0.61 (dd, 1H, *J* = 6.4, 9.0 Hz), 0.39 (d, 1H, *J* = 9.2 Hz); <sup>13</sup>C NMR (125 MHz, CDCl<sub>3</sub>) δ 166.5, 133.0, 130.0, 129.5, 128.3, 71.8, 66.5, 63.8, 32.5, 31.8, 30.9, 29.3, 28.9, 28.4, 27.0, 25.5, 12.4; IR (ATR) ν = 2953, 2864, 1719, 1602, 1451, 1267, 1096 cm<sup>-1</sup>; HRMS (ESI) *m/z* calcd for C<sub>20</sub>H<sub>26</sub>O<sub>3</sub>Na [(M+Na)<sup>+</sup>] 337.1774, found 337.1761.

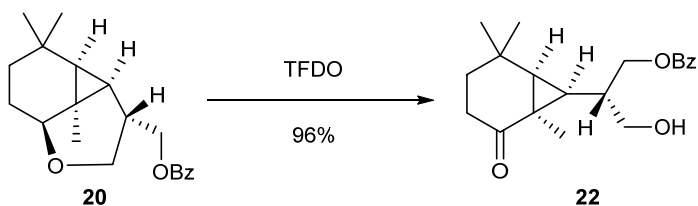

**Compound 22:** To a solution of ether **20** (17.0 mg, 0.0547 mmol) in  $\text{CH}_2\text{Cl}_2$  (1 mL) was added TFDO (in trifluoroacetone, *ca.* 0.5 M, 20 drops) was added at  $-78^\circ\text{C}$ . After the solution was stirred for 5 min at  $-78^\circ\text{C}$ , the TFDO solution was added until ether **17** was completely completed. The reaction solution was concentrated, and the residue was purified by silica gel column chromatography (25-50% EtOAc/hexane) to afford **22** as a colorless oil (17.0 mg, 96%):  $^1\text{H}$  NMR (500 MHz,  $\text{CDCl}_3$ )  $\delta$  8.03 (d, 2H,  $J = 7.4$  Hz), 7.57 (t, 1H,  $J = 7.4$  Hz), 7.44 (t, 2H,  $J = 7.6$  Hz), 4.71 (dd, 1H,  $J = 11.0, 3.3$  Hz), 4.42 (dd, 1H,  $J = 11.0, 7.6$  Hz), 3.73-3.59 (m, 2H), 2.48-2.32 (m, 2H), 2.30-2.19 (m, 1H), 2.18-2.10 (m, 1H), 1.88-1.77 (m, 1H), 1.56 (dd, 1H,  $J = 14.3, 8.6$  Hz), 1.37-1.11 (m, 2H), 1.29 (s, 3H), 1.28 (s, 3H), 1.15 (s, 3H),  $^{13}\text{C}$  NMR (125 MHz,  $\text{CDCl}_3$ )  $\delta$  211.7, 166.8, 133.2, 129.7, 128.4, 64.7, 62.6, 41.7, 38.7, 34.8, 33.2, 32.8, 31.9, 30.6, 30.5, 30.0, 22.5; IR (ATR)  $\nu = 3445, 2958, 2885, 1717, 1668, 1451, 1270$   $\text{cm}^{-1}$ ; HRMS (ESI)  $m/z$  calcd for  $\text{C}_{20}\text{H}_{27}\text{O}_4$   $[(\text{M}+\text{H})^+]$  331.1904, found 331.1920.

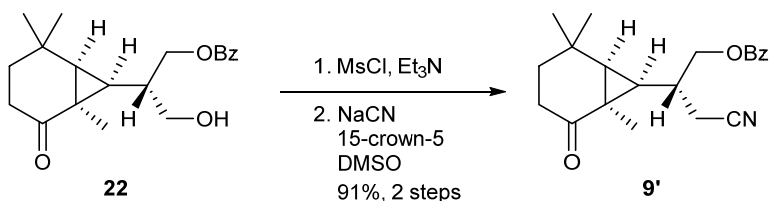

**Compound 9':** To a solution of alcohol **22** (4.3 mg, 0.013 mmol) in  $\text{CH}_2\text{Cl}_2$  (1 mL) were added  $\text{Et}_3\text{N}$  (3.6  $\mu\text{L}$ , 0.026 mmol) and  $\text{MsCl}$  (2.0  $\mu\text{L}$ , 0.026 mmol) at  $0^\circ\text{C}$ . The solution was stirred at  $0^\circ\text{C}$  for 10 min. The additional  $\text{Et}_3\text{N}$  (7.2  $\mu\text{L}$ , 0.052 mmol) and  $\text{MsCl}$  (4.0  $\mu\text{L}$ , 0.052 mmol) were added, and the solution was stirred for 25 min. The reaction was quenched with 1 M aq.  $\text{HCl}$ , and the resultant solution was extracted with  $\text{CHCl}_3$  three times. The combined organic layers were dried over  $\text{Na}_2\text{SO}_4$ , filtered and concentrated under reduced pressure to give a crude mesylate (5.1 mg, crude)

To a solution of the above crude mesylate (5.1 mg) in DMSO (850  $\mu\text{L}$ ) was added 15-crown-5 (12.9  $\mu\text{L}$ , 0.0651 mmol) and  $\text{NaCN}$  (3.8 mg, 0.0775 mmol) at room temperature. The reaction mixture was stirred at  $50^\circ\text{C}$  for 4.5 h. After dilution with  $\text{Et}_2\text{O}$  and water at  $0^\circ\text{C}$ , the mixture was extracted with  $\text{Et}_2\text{O}$  three times. The combined organic layers were washed with brine, dried over  $\text{Na}_2\text{SO}_4$ , filtered and concentrated under reduced pressure. The residue was purified by silica gel column chromatography (25-40% EtOAc/hexane) to afford **9'** as a colorless oil (4.0 mg, 91%, 2

steps):  $^1\text{H}$  NMR (500 MHz,  $\text{CDCl}_3$ )  $\delta$  7.98 (d, 2H,  $J = 7.7$  Hz), 7.53 (t, 1H,  $J = 7.4$  Hz), 7.40 (t, 2H,  $J = 7.7$  Hz), 4.74 (dd, 1H,  $J = 11.6, 3.6$  Hz), 4.19 (dd, 1H,  $J = 11.5, 9.2$  Hz), 2.59 (dd, 1H,  $J = 16.9, 3.7$  Hz), 2.46 (dd, 1H,  $J = 16.9, 5.7$  Hz), 2.39-2.29 (m, 1H), 2.28-2.11 (m, 1H), 2.17 (dd, 1H,  $J = 19.0, 5.3$  Hz), 1.69 (dt, 1H,  $J = 20.0, 6.8$  Hz), 1.58 (dd, 1H,  $J = 14.0, 8.0$  Hz), 1.29 (s, 3H), 1.25 (s, 3H), 1.24-1.09 (m, 2H), 1.14 (s, 3H),  $^{13}\text{C}$  NMR (125 MHz,  $\text{CDCl}_3$ )  $\delta$  210.6, 166.2, 133.5, 129.7, 129.2, 128.5, 117.1, 65.9, 41.2, 35.2, 33.4, 33.1, 31.4, 30.5, 30.2, 30.1, 22.2, 19.9; IR (ATR)  $\nu = 2962, 2923, 1721, 1681, 1271, 1236, 1091$   $\text{cm}^{-1}$ ; HRMS (ESI)  $m/z$  calcd for  $\text{C}_{21}\text{H}_{25}\text{NO}_3$   $[(\text{M}+\text{Na})^+]$  362.1727, found 362.1723.

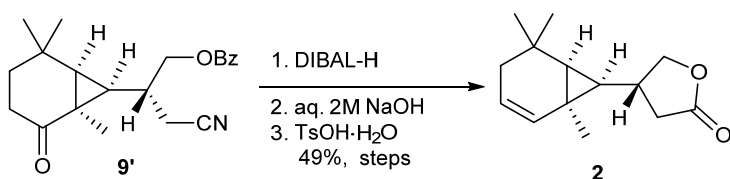

**Compound 2:** To a solution of nitrile **9'** (120 mg, 0.354 mmol) in THF (3.5 mL) was added DIBAL-H (1.0 M in THF, 1.1 mL) at  $-20$   $^\circ\text{C}$ . The solution was stirred at  $-20$   $^\circ\text{C}$  for 25 min. Additional DIBAL-H (1.0 M in THF, 400  $\mu\text{L}$ ) was then added. After 20 min, the reaction was quenched with MeOH and satd. aq. Rochelle salt, and the mixture was diluted with  $\text{Et}_2\text{O}$ . After 1h, the resulting mixture was extracted with  $\text{Et}_2\text{O}$  three times. The combined organic layers were washed with brine, dried over  $\text{Na}_2\text{SO}_4$ , filtered and concentrated under reduced pressure to give a mixture of alcohol and diol (crude).

A solution of the above crude mixture in 2 M aq. NaOH (3.5 mL) was heated to  $100$   $^\circ\text{C}$ . After 5 h, the mixture was cooled to room temperature, and neutralized with 1 M aq. HCl. The mixture was extracted with  $\text{CHCl}_3$  three times. The combined organic layers were dried over  $\text{Na}_2\text{SO}_4$ , filtered and concentrated under reduced pressure to give a crude lactone **25** (99 mg).

To a solution of the above crude lactone **25** (99 mg) in benzene (7 mL) was added  $\text{TsOH}\cdot\text{H}_2\text{O}$  (13 mg, 0.0683 mmol) at room temperature. The solution was stirred at  $100$   $^\circ\text{C}$  with a Dean-Stark trap for 30 min. The reaction was quenched with satd. aq.  $\text{NaHCO}_3$  at room temperature. The resultant mixture was extracted with  $\text{EtOAc}$  three times. The combined organic layers were washed with brine, dried over  $\text{Na}_2\text{SO}_4$ , filtered and concentrated under reduced pressure. The residue was purified by silica gel column chromatography (5-40%  $\text{EtOAc}$ /hexane) to afford **2** as a colorless oil (38 mg, 49%, 3 steps):  $^1\text{H}$  NMR (500 MHz,  $\text{CDCl}_3$ )  $\delta$  5.72 (dd, 1H,  $J = 10.0, 2.6$  Hz), 5.57-5.51 (m, 1H), 4.46 (t, 1H,  $J = 8.0$  Hz), 4.12 (t, 1H,  $J = 7.9$  Hz), 2.55 (dd, 1H,  $J = 17.2, 8.0$  Hz), 2.30-2.21 (m, 1H), 2.15 (dd, 1H,  $J = 17.3, 7.6$  Hz), 1.85 (dd, 1H,  $J = 18.0, 5.4$ ), 1.53 (d, 1H,  $J = 18.0$  Hz), 1.27-1.21 (m, 1H), 1.23 (s, 3H), 1.05 (s, 3H), 0.96 (s, 3H), 0.82-0.73 (m, 2H);  $^{13}\text{C}$  NMR (125 MHz,  $\text{CDCl}_3$ )  $\delta$  177.3, 129.3, 123.7, 73.2, 38.3, 37.7, 36.8, 36.1, 32.6, 31.5, 30.7, 27.6, 25.7, 19.5; IR (ATR)  $\nu = 2974, 2919, 1469, 1236, 1089, 890$   $\text{cm}^{-1}$ ; HRMS (ESI)  $m/z$  calcd for  $\text{C}_{14}\text{H}_{20}\text{O}_2\text{Na}$   $[(\text{M}+\text{Na})^+]$  243.1356, found

243.1365.

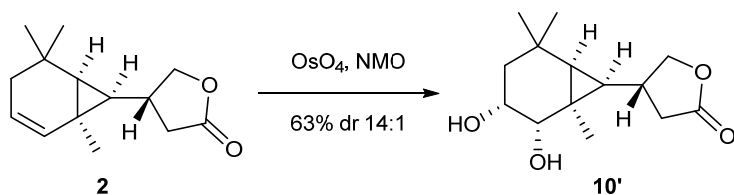

**Compound 10'**: To a solution of alkene **2** (38 mg, 0.174 mmol) in acetone-H<sub>2</sub>O (20:1, 3.5 mL) was added NMO (24 mg, 0.205 mmol) and OsO<sub>4</sub> (*t*-BuOH solution, 0.0393 M, 443 μL). The reaction mixture was stirred at 50 °C for 8 h. Additional OsO<sub>4</sub> (*t*-BuOH solution, 0.0393 M, 222 μL) was added, and the mixture was stirred for 2.5 h. After cooling to room temperature, the reaction was quenched with 10% aq. Na<sub>2</sub>S<sub>2</sub>O<sub>3</sub>. The mixture was extracted with EtOAc three times. The combined organic layers were washed with brine, dried over Na<sub>2</sub>SO<sub>4</sub>, filtered and concentrated under reduced pressure. The residue was purified by silica gel column chromatography (20-90% EtOAc/hexane) to afford **10'** as a colorless oil (27 mg, 63%, dr 14:1): <sup>1</sup>H NMR (500 MHz, CDCl<sub>3</sub>) δ 4.49 (dd, 1H, *J* = 8.6, 6.9 Hz), 4.16 (dd, 1H, *J* = 9.0, 5.0 Hz), 3.86 (s, 1H), 3.47 (s, 1H), 2.76 (dd, 1H, *J* = 19.3, 10.2 Hz), 2.38 (d, 1H, *J* = 5.4 Hz), 2.36-2.48 (m, 2H), 2.09 (d, 1H, *J* = 4.9 Hz), 1.72 (dd, 1H, *J* = 14.7, 7.0 Hz), 1.29 (s, 3H), 1.22 (s, 3H), 1.10 (d, 1H, *J* = 16.0 Hz), 0.93 (s, 3H), 0.75 (d, 1H, *J* = 9.5 Hz), 0.68 (t, 1H, *J* = 10.7 Hz); <sup>13</sup>C NMR (125 MHz, CDCl<sub>3</sub>) δ 177.0, 74.2, 70.0, 68.5, 41.3, 36.1, 35.1, 34.0, 32.7, 32.2, 29.8, 28.6, 24.8, 20.3; IR (ATR) ν = 3439, 2977, 2919, 1775, 1469, 1382, 1089, 891 cm<sup>-1</sup>; HRMS (ESI) *m/z* calcd for C<sub>14</sub>H<sub>22</sub>O<sub>4</sub>Na [(M+Na)<sup>+</sup>] 277.1410, found 277.1420.

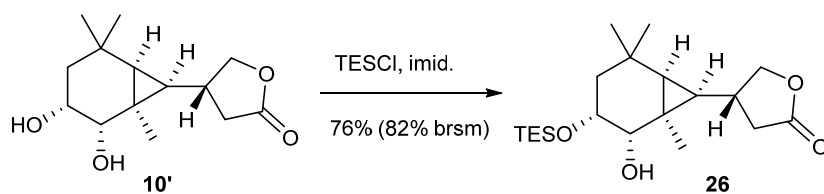

**Compound 26**: To a solution of diol **10'** (16 mg, 0.0630 mmol) in DMF (1 mL) were added imidazole (11 mg, 0.162 mmol) and TESCl (14 μL, 0.0995 mmol) at room temperature. The solution was stirred at room temperature for 40 min. The reaction was quenched with satd. aq. NaHCO<sub>3</sub>, and the resultant mixture was extracted with ether three times. The combined organic layers were washed with water and brine, dried over Na<sub>2</sub>SO<sub>4</sub>, filtered and concentrated under reduced pressure. The residue was purified by silica gel column chromatography (15-90% EtOAc/hexane) to afford **26** as a colorless oil (17 mg, 76%) and **10'** (1.1 mg, 7%) was recovered (brsm 82%): <sup>1</sup>H NMR (500 MHz, CDCl<sub>3</sub>) δ 4.48 (t, 1H, *J* = 7.9 Hz), 4.13 (dd, 1H, *J* = 8.9, 5.2 Hz), 3.82 (t, 1H, *J* = 3.6 Hz), 3.37 (dd, 1H, *J* = 7.0, 2.7 Hz), 2.72 (dd, 1H, *J* = 17.0, 7.9 Hz), 2.51 (d, 1H, *J* = 7.2 Hz), 2.35-2.28 (m, 2H), 1.65 (dd, 1H, *J* = 15.6, 8.4 Hz), 1.25 (s, 3H), 1.19 (s, 3H), 0.98 (t, 9H, *J* = 7.7 Hz),

1.04-0.93 (m, 1H), 0.89 (s, 3H), 0.70 (d, 1H,  $J = 9.2$  Hz), 0.67-0.59 (m, 7H);  $^{13}\text{C}$  NMR (125 MHz,  $\text{CDCl}_3$ )  $\delta$  176.7, 74.1, 70.8, 68.6, 41.8, 36.1, 35.0, 33.7, 33.0, 32.3, 29.5, 28.9, 24.8, 21.1; IR (ATR)  $\nu = 3537, 2953, 2917, 1779, 1693, 1467, 1379, 1236, 1162, 1089\text{ cm}^{-1}$ ; HRMS (FAB)  $m/z$  calcd for  $\text{C}_{20}\text{H}_{36}\text{O}_4\text{SiNa}$   $[(\text{M}+\text{Na})^+]$  391.2281, found 391.2287.

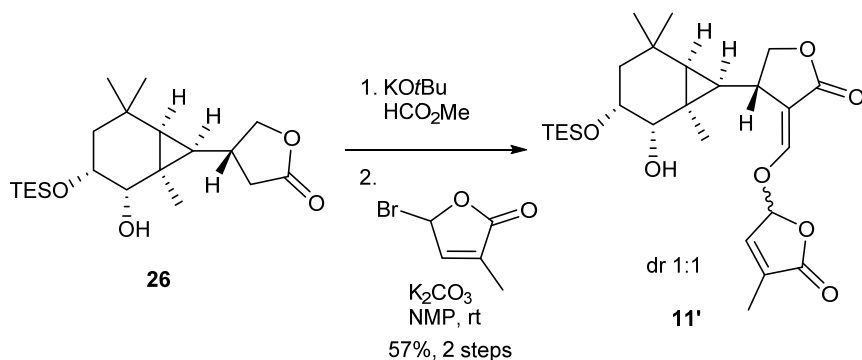

**Compound 11'**: To a solution of alcohol **26** (5.6 mg, 0.0152 mmol) in THF (1 mL) was added HCO<sub>2</sub>Me (17  $\mu\text{L}$ , 0.152 mmol) at room temperature. After cooling to  $-78\text{ }^\circ\text{C}$ , KOtBu (1.0 M in THF, 17  $\mu\text{L}$ , 0.017 mmol) was added. The solution was stirred at room temperature for 15 min. The reaction was quenched with satd. aq. NH<sub>4</sub>Cl, and the mixture was extracted with EtOAc three times. The combined organic layers were washed with brine, dried over Na<sub>2</sub>SO<sub>4</sub>, filtered and concentrated under reduced pressure to afford a crude formylated product (5.3 mg) as a colorless oil.

To a solution of the above crude product (5.3 mg) in NMP (500  $\mu\text{L}$ ) were added K<sub>2</sub>CO<sub>3</sub> (6.1 mg, 0.0499 mmol) and a solution of 5-Bromo-3-methyl-2(5H)-furanone (8.5 mg, 0.0480 mmol) in NMP (200  $\mu\text{L}$ ) at room temperature. The solution was stirred at room temperature for 15 h. The reaction was quenched with satd. aq. NH<sub>4</sub>Cl, and the resultant mixture was extracted with ether six times. The combined organic layers were washed with water twice and brine, dried over Na<sub>2</sub>SO<sub>4</sub>, filtered and concentrated under reduced pressure. The residue was purified by silica gel column chromatography (15-35% EtOAc/hexane) to afford **11'** as a colorless oil (4.3 mg, 57%, dr 1:1) and **26** (2.0 mg, 36%) was recovered:  $^1\text{H}$  NMR (500 MHz, C<sub>6</sub>D<sub>6</sub>)  $\delta$  7.53 (s, 1H), 7.51 (s, 1H), 6.41 (s, 1H), 6.09 (s, 1H), 5.37 (s, 1H), 5.20 (s, 1H), 3.94 (t, 1H,  $J = 8.3$  Hz), 3.88 (t, 1H,  $J = 8.3$  Hz), 3.78 (dd,  $J = 8.6, 3.4$  Hz), 3.75-3.71 (m, 2H), 3.67 (t, 1H,  $J = 2.6$  Hz), 3.59 (dd, 1H,  $J = 8.3, 3.2$  Hz), 3.51 (dd, 1H,  $J = 9.2$  Hz, 2.9 Hz), 2.35 (s, 2H), 2.20 (d, 1H,  $J = 8.6$  Hz), 2.12 (d, 1H,  $J = 9.2$  Hz), 1.58 (m, 2H), 1.52 (s, 5H), 1.48-1.41 (m, 3H), 1.19 (s, 6H), 1.24-1.17 (m, 1H), 1.14 (s, 3H), 1.10 (s, 3H), 1.01-0.92 (m, 18H), 0.63-0.43 (m, 17H), 0.35 (t, 1H,  $J = 10.6$  Hz), 0.27 (d, 2H,  $J = 11.5$  Hz), 0.22 (m, 2H);  $^{13}\text{C}$  NMR (125 MHz, C<sub>6</sub>D<sub>6</sub>)  $\delta$  171.3, 170.6, 170.0, 170.0, 150.8, 142.0, 141.3, 140.5, 135.5, 134.7, 133.9, 100.9, 100.7, 98.3, 98.3, 72.4, 72.2, 71.9, 71.8, 68.2, 42.8, 42.5, 36.2, 33.8, 33.8, 33.7, 33.3, 32.9, 32.9, 31.9, 30.8, 30.5, 28.6, 28.5, 27.8, 25.2, 24.9, 21.5, 21.1, 10.3, 10.3, 10.2, 7.1, 7.1, 5.3; IR (ATR)  $\nu = 3546, 3094, 2953, 2875, 1777, 1677\text{ cm}^{-1}$ ; HRMS (FAB)  $m/z$  calcd for

$C_{26}H_{40}O_7SiNa [(M+Na)^+]$  515.2441, found 515.2444.

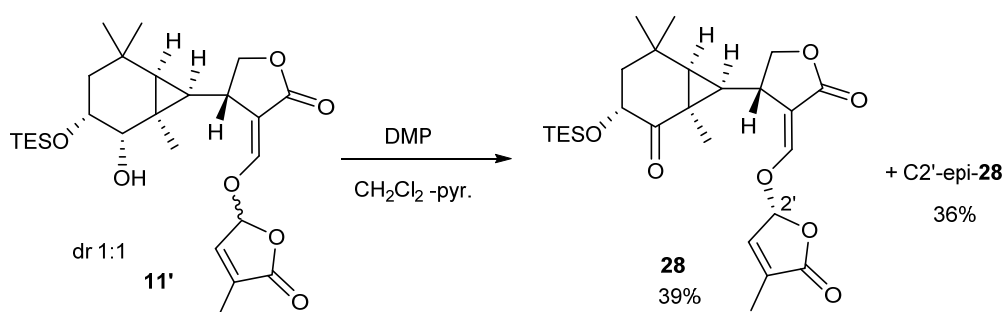

**Compound 28** and C2' epi-**28**: To a solution of alcohol **11'** (4.2 mg, 8.53  $\mu$ mol) in CH<sub>2</sub>Cl<sub>2</sub>-pyridine (8:1, 900  $\mu$ L) was added DMP (4.5 mg, 0.0106 mmol) at room temperature. The solution was stirred for 1h. The reaction was quenched with satd. aq. NaHCO<sub>3</sub> and 10% aq. Na<sub>2</sub>S<sub>2</sub>O<sub>3</sub>, and the resultant mixture was extracted with EtOAc three times. The combined organic layers were washed with water and brine, dried over Na<sub>2</sub>SO<sub>4</sub>, filtered and concentrated under reduced pressure. The residue was purified by silica gel column chromatography (20-30% EtOAc/hexane) to afford **28** (1.6 mg, 39%) and C2' epi-**28** (1.5 mg, 36%) as a colorless oil: <sup>1</sup>H NMR (500 MHz, C<sub>6</sub>D<sub>6</sub>)  $\delta$  7.34 (s, 1H), 6.10 (s, 1H), 5.13 (s, 1H), 3.83 (t, 1H,  $J = 8.7$  Hz), 3.66 (dd, 1H,  $J = 7.6, 2.4$  Hz), 3.58 (dd, 1H,  $J = 8.6, 5.2$  Hz), 2.59 (s, 1H), 1.63 (s, 3H), 1.59-1.47 (m, 2H), 1.11 (t, 9H), 1.03 (s, 3H), 0.99-0.88 (m, 1H), 0.97 (s, 3H), 0.84-0.69 (m, 6H), 0.61 (s, 3H), 0.63-0.54 (m, 2H); <sup>13</sup>C NMR (125 MHz, C<sub>6</sub>D<sub>6</sub>)  $\delta$  207.2, 170.3, 170.0, 151.6, 142.0, 140.6, 135.4, 110.8, 100.4, 98.3, 71.2, 71.0, 46.1, 43.4, 39.0, 34.8, 33.7, 31.5, 29.9, 29.6, 22.3, 10.4, 10.2, 7.3, 5.6; IR (ATR)  $\nu = 2956, 3873, 1779, 1688, 1456, 1373, 1186, 1011$  cm<sup>-1</sup>; HRMS (FAB)  $m/z$  calcd for C<sub>26</sub>H<sub>38</sub>O<sub>7</sub>SiNa [(M+Na)<sup>+</sup>] 513.2285, found 513.2288; C2' epi-**28**: <sup>1</sup>H NMR (500 MHz, C<sub>6</sub>D<sub>6</sub>)  $\delta$  7.36 (s, 1H), 6.39 (s, 1H), 5.02 (s, 1H), 3.79 (t, 1H,  $J = 8.6$  Hz), 3.66 (dd, 1H,  $J = 8.7, 3.9$  Hz), 3.60 (dd, 1H,  $J = 7.0, 2.1$  Hz), 2.53 (s, 1H), 1.65 (s, 3H), 1.59-1.45 (m, 3H), 1.12-1.04 (m, 9H), 1.00 (s, 3H), 0.78-0.55 (m, 7H), 0.64 (s, 3H), 0.41 (s, 3H) <sup>13</sup>C NMR (100 MHz, C<sub>6</sub>D<sub>6</sub>)  $\delta$  207.2, 170.1, 169.8, 151.9, 141.2, 134.7, 110.9, 100.5, 71.3, 70.8, 46.0, 43.5, 39.8, 34.4, 33.7, 31.4, 29.9, 29.7, 22.8, 10.4, 7.2, 5.5; IR (ATR)  $\nu = 2974, 2919, 2022, 1782, 1747, 1688, 1236, 1089$  cm<sup>-1</sup>; HRMS (FAB)  $m/z$  calcd for C<sub>26</sub>H<sub>38</sub>O<sub>7</sub>SiNa [(M+Na)<sup>+</sup>] 513.2285, found 513.2270.

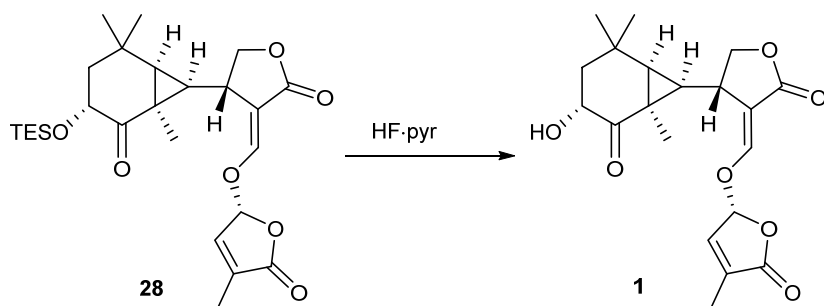

**Compound 1:** To a solution of ketone **28** (1.9 mg, 3.88  $\mu\text{mol}$ ) in THF (400  $\mu\text{L}$ ) was added HF·pyridine-pyridine-THF solution (1:3:16, 25  $\mu\text{L}$ ) at room temperature. The solution was stirred at 50  $^{\circ}\text{C}$  for 45 min. An additional HF·pyridine-pyridine-THF (1:3:16, 50  $\mu\text{L}$ ) was then added. After 1 h, the mixture was cooled to 0  $^{\circ}\text{C}$ . The reaction was quenched with satd. aq.  $\text{NaHCO}_3$ , and the resultant mixture was extracted with EtOAc three times. The combined organic layers were washed with brine, dried over  $\text{Na}_2\text{SO}_4$ , filtered and concentrated under reduced pressure. The residue was purified by silica gel column chromatography (45-65% EtOAc/hexane) to afford avenaol (**1**) as a colorless oil (1.3 mg, 97%):  $^1\text{H}$  NMR (500 MHz,  $\text{C}_6\text{D}_6$ )  $\delta$  7.30 (s, 1H), 5.77 (s, 1H), 4.90 (s, 1H), 3.89 (s, 1H), 3.78 (s, 1H), 3.78 (t, 1H,  $J = 8.6$  Hz), 3.62 (t, 1H,  $J = 6.4$  Hz), 3.53 (dd, 1H,  $J = 8.4$ , 3.9 Hz), 2.66 (t, 1H,  $J = 9.3$  Hz), 1.66 (s, 3H), 1.60 (d, 2H,  $J = 6.6$  Hz), 1.01 (s, 3H), 0.75 (s, 3H), 0.68-0.58 (m, 2H);  $^{13}\text{C}$  NMR (125 MHz,  $\text{C}_6\text{D}_6$ )  $\delta$  210.4, 169.9, 169.7, 151.9, 139.4, 135.5, 110.4, 100.3, 70.8, 69.9, 46.3, 46.2, 40.1, 33.8, 33.4, 31.7, 29.6, 28.6, 21.3, 10.2; IR (ATR)  $\nu = 3461, 2959, 2855, 1780, 1751, 1682, 1341, 1186$   $\text{cm}^{-1}$ ; HRMS (FAB)  $m/z$  calcd for  $\text{C}_{20}\text{H}_{24}\text{O}_7\text{Na}$   $[(\text{M}+\text{Na})^+]$  399.1420, found 399.1423.

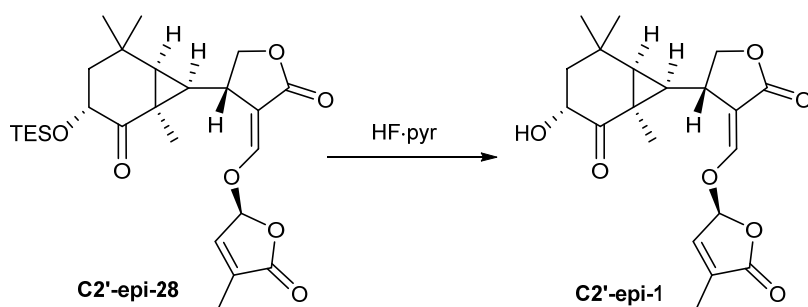

**Compound C2' epi-1:** To a solution of ketone **C2'-epi-28** (5.3 mg, 10.8  $\mu\text{mol}$ ) in THF (500  $\mu\text{L}$ ) was added HF·pyridine-pyridine-THF solution (1:3:16, 76  $\mu\text{L}$ ) at room temperature. The solution was stirred at 50  $^{\circ}\text{C}$  for 45 min. An additional HF·pyridine-pyridine-THF (1:3:16, 25  $\mu\text{L}$ ) was then added. After 1 h, the mixture was cooled to 0  $^{\circ}\text{C}$ . The reaction was quenched with satd. aq.  $\text{NaHCO}_3$ , and the resultant solution was extracted with EtOAc three times. The combined organic layers were washed with brine, dried over  $\text{Na}_2\text{SO}_4$ , filtered and concentrated under reduced pressure. The residue was purified by silica gel column chromatography (45-65% EtOAc/hexane) to afford **C2' epi-1** as a

colorless oil (0.6 mg, 11%). For X-ray crystallography, C2' epi-1 was recrystallized from ethyl acetate:  $^1\text{H}$  NMR (500 MHz,  $\text{C}_6\text{D}_6$ )  $\delta$  7.27 (d,  $J = 1.7$  Hz), 6.17 (s, 1H), 4.89 (s, 1H), 3.75 (s, 1H), 3.71 (t, 1H,  $J = 8.6$  Hz), 3.62 (t, 1H,  $J = 6.9$  Hz), 3.56 (dd, 1H,  $J = 8.9, 3.2$  Hz), 2.56 (t, 1H,  $J = 9.7$  Hz), 1.55 (d, 2H,  $J = 6.9$  Hz), 1.53 (s, 3H), 1.09 (s, 3H), 0.78 (s, 3H), 0.76-0.68 (m, 2H), 0.49 (s, 3H);  $^{13}\text{C}$  NMR (125 MHz,  $\text{C}_6\text{D}_6$ )  $\delta$  211.4, 170.2, 170.0, 152.0, 140.9, 135.0, 110.4, 100.6, 71.4, 70.3, 46.8, 46.8, 41.1, 34.0, 33.6, 32.4, 30.3, 29.9, 28.8, 22.1, 10.4 ; IR (ATR)  $\nu = 3473, 2961, 2922, 2026, 1781, 1752, 1088, 890$   $\text{cm}^{-1}$ ; HRMS (FAB)  $m/z$  calcd for  $\text{C}_{20}\text{H}_{24}\text{O}_7\text{Na}$   $[(\text{M}+\text{Na})^+]$  399.1420, found 399.1433.



## Experimental details of X-ray crystallography of C2'-epi avenaol

### A. Crystal Data

Empirical Formula C<sub>20</sub>H<sub>24</sub>O<sub>7</sub>

Formula Weight 376.41

Crystal Color, Habit colorless, nONE

Crystal Dimensions not described

Crystal System monoclinic

Lattice Type Primitive

No. of Reflections Used for Unit

Cell Determination (2 $\theta$  range) 5633 ( 8.6 - 145.0 $\circ$  )

Omega Scan Peak Width  
at Half-height 0.00 $\circ$

Lattice Parameters a = 7.8120(3) Å

b = 19.6845(5) Å

c = 12.1028(3) Å

$\beta$  = 99.228(3)  $\circ$

V = 1837.03(10) Å<sup>3</sup>

Space Group P2<sub>1</sub>/c (#14)

Z value 4

D<sub>calc</sub> 1.361 g/cm<sup>3</sup>

F<sub>000</sub> 800.00

$\mu$ (CuK $\alpha$ ) 8.608 cm<sup>-1</sup>

## B. Intensity Measurements

Diffractometer

Radiation CuK $\alpha$  ( $\lambda = 1.54187 \text{ \AA}$ )  
graphite monochromated

Take-off Angle  $2.8^\circ$

Detector Aperture  $2.0 - 2.5 \text{ mm}$  horizontal  
 $2.0 \text{ mm}$  vertical

Crystal to Detector Distance  $21 \text{ mm}$

Temperature  $23.0^\circ\text{C}$

Scan Type  $\omega$ - $2\theta$

Scan Rate  $0.0^\circ/\text{min}$  (in  $\omega$ ) (up to 0 scans)

Scan Width  $(0.00 + 0.00 \tan \theta)^\circ$

$2\theta_{\text{max}}$   $146.6^\circ$

No. of Reflections Measured Total: 17343

Unique: 3478 ( $R_{\text{int}} = 0.0641$ )

Corrections Lorentz-polarization  
Absorption  
(trans. factors: 0.598 - 1.000)

### C. Structure Solution and Refinement

Structure Solution Direct Methods (SIR2011)

Refinement Full-matrix least-squares on F<sup>2</sup>

Function Minimized  $\sum w (F_o^2 - F_c^2)^2$

Least Squares Weights  $w = 1 / [ \sigma^2(F_o^2) + (0.0596 \cdot P)^2 + 1.1269 \cdot P ]$   
where  $P = (\text{Max}(F_o^2, 0) + 2F_c^2) / 3$

2 $\theta$ max cutoff 146.60

Anomalous Dispersion All non-hydrogen atoms

No. Observations (All reflections) 3478

No. Variables 244

Reflection/Parameter Ratio 14.25

Residuals: R1 (I > 2.00 $\sigma$ (I)) 0.0507

Residuals: R (All reflections) 0.0718

Residuals: wR2 (All reflections) 0.1494

Goodness of Fit Indicator 1.083

Max Shift/Error in Final Cycle 0.000

Maximum peak in Final Diff. Map 0.24 e<sup>-</sup>/Å<sup>3</sup>

Minimum peak in Final Diff. Map -0.23 e<sup>-</sup>/Å<sup>3</sup>

Table 1. Atomic coordinates and Bis0/Beq

| atom | x         | y | z            | Beq                 |
|------|-----------|---|--------------|---------------------|
| O1   | 0.7595(2) |   | 0.07108(8)   | 0.70816(12) 2.71(3) |
| O2   | 0.8045(2) |   | -0.02489(8)  | 0.81978(12) 2.72(3) |
| O3   | 0.6906(3) |   | -0.07375(9)  | 0.95861(14) 3.37(4) |
| O4   | 0.2222(2) |   | 0.12131(9)   | 0.81549(14) 3.32(4) |
| O5   | 0.5332(2) |   | 0.17897(10)  | 0.85148(14) 3.33(4) |
| O6   | 0.5744(3) |   | 0.07304(9)   | 0.32591(13) 3.33(4) |
| O7   | 0.8317(3) |   | 0.02342(10)  | 0.37385(14) 3.84(4) |
| C1   | 0.6782(3) |   | 0.07141(11)  | 0.51435(18) 2.49(4) |
| C2   | 0.7537(3) |   | -0.02432(12) | 0.92304(18) 2.59(4) |
| C3   | 0.3115(3) |   | 0.12711(13)  | 0.72281(19) 2.71(4) |
| C4   | 0.8622(4) |   | 0.08039(13)  | 0.90263(19) 2.78(4) |
| C5   | 0.8712(3) |   | 0.04072(12)  | 0.79916(18) 2.61(4) |
| C6   | 0.7896(4) |   | 0.05303(12)  | 0.60421(18) 2.63(4) |
| C7   | 0.4703(3) |   | 0.17257(12)  | 0.75281(19) 2.61(4) |
| C8   | 0.7099(4) |   | 0.05289(12)  | 0.40210(19) 2.95(5) |
| C9   | 0.7914(3) |   | 0.04331(12)  | 0.97463(18) 2.62(4) |
| C10  | 0.5351(3) |   | 0.18227(12)  | 0.54564(19) 2.59(4) |
| C11  | 0.5405(3) |   | 0.21045(12)  | 0.6641(2) 2.55(4)   |
| C12  | 0.1821(4) |   | 0.14986(13)  | 0.6212(2) 2.94(5)   |
| C13  | 0.2124(3) |   | 0.22044(13)  | 0.5746(2) 2.77(5)   |
| C14  | 0.7499(4) |   | 0.06013(14)  | 1.0873(2) 3.29(5)   |
| C15  | 0.4020(3) |   | 0.23351(12)  | 0.5669(2) 2.69(4)   |
| C16  | 0.5102(3) |   | 0.10935(12)  | 0.50556(18) 2.52(4) |
| C17  | 0.4459(4) |   | 0.10740(14)  | 0.37896(19) 3.06(5) |
| C18  | 0.1019(4) |   | 0.22780(15)  | 0.4597(2) 3.57(5)   |
| C19  | 0.1599(4) |   | 0.27491(14)  | 0.6536(2) 3.38(5)   |
| C20  | 0.6882(4) |   | 0.25732(14)  | 0.7077(2) 3.38(5)   |

$$\text{Beq} = 8/3 p^2(U_{11}(aa^*)^2 + U_{22}(bb^*)^2 + U_{33}(cc^*)^2 + 2U_{12}(aa^*bb^*)\cos g + 2U_{13}(aa^*cc^*)\cos b + 2U_{23}(bb^*cc^*)\cos a)$$

Table 2. Atomic coordinates and Biso involving hydrogen atoms

| atom | x        | y       | z       | Biso  |
|------|----------|---------|---------|-------|
| H4   | 0.29158  | 0.11260 | 0.87200 | 3.983 |
| H3   | 0.35254  | 0.08170 | 0.70669 | 3.252 |
| H4A  | 0.90071  | 0.12487 | 0.91498 | 3.337 |
| H5   | 0.99050  | 0.03779 | 0.78400 | 3.127 |
| H6   | 0.88769  | 0.02794 | 0.59620 | 3.156 |
| H10  | 0.62431  | 0.20430 | 0.50969 | 3.112 |
| H12A | 0.06684  | 0.14898 | 0.64138 | 3.533 |
| H12B | 0.18390  | 0.11686 | 0.56189 | 3.533 |
| H14A | 0.76715  | 0.02067 | 1.13437 | 3.945 |
| H14B | 0.63126  | 0.07453 | 1.08022 | 3.945 |
| H14C | 0.82456  | 0.09603 | 1.11992 | 3.945 |
| H15  | 0.42329  | 0.27902 | 0.53922 | 3.225 |
| H16  | 0.42923  | 0.08548 | 0.54608 | 3.026 |
| H17A | 0.33616  | 0.08340 | 0.36353 | 3.669 |
| H17B | 0.42846  | 0.15325 | 0.34999 | 3.669 |
| H18A | 0.13346  | 0.19328 | 0.41070 | 4.284 |
| H18B | 0.12088  | 0.27179 | 0.42964 | 4.284 |
| H18C | -0.01830 | 0.22299 | 0.46637 | 4.284 |
| H19A | 0.21889  | 0.26673 | 0.72833 | 4.058 |
| H19B | 0.03686  | 0.27308 | 0.65273 | 4.058 |
| H19C | 0.19109  | 0.31898 | 0.62931 | 4.058 |
| H20A | 0.71869  | 0.28370 | 0.64705 | 4.058 |
| H20B | 0.78656  | 0.23101 | 0.74103 | 4.058 |
| H20C | 0.65364  | 0.28714 | 0.76290 | 4.058 |

Table 3. Anisotropic displacement parameters

| atom | U11                      | U22 | U33                      | U12       | U13        | U23                     |
|------|--------------------------|-----|--------------------------|-----------|------------|-------------------------|
| O1   | 0.0405(11)<br>0.0012(6)  |     | 0.0397(9)                | 0.0237(7) | 0.0026(8)  | 0.0083(7)               |
| O2   | 0.0438(11)<br>-0.0005(6) |     | 0.0329(9)                | 0.0278(8) | -0.0025(8) | 0.0098(7)               |
| O3   | 0.0497(13)<br>0.0064(8)  |     | 0.0406(10)               |           | 0.0392(9)  | -0.0082(8)<br>0.0115(8) |
| O4   | 0.0430(12)<br>0.0084(8)  |     | 0.0544(11)               |           | 0.0320(8)  | -0.0051(9)<br>0.0161(8) |
| O5   | 0.0408(12)<br>-0.0069(8) |     | 0.0547(11)               |           | 0.0312(8)  | 0.0007(9)<br>0.0066(8)  |
| O6   | 0.0525(13)<br>-0.0001(7) |     | 0.0476(11)               |           | 0.0272(8)  | 0.0107(9)<br>0.0091(8)  |
| O7   | 0.0606(14)<br>-0.0008(8) |     | 0.0520(12)               |           | 0.0359(9)  | 0.0183(10)<br>0.0152(9) |
| C1   | 0.0422(16)<br>0.0095(10) |     | 0.0269(11)<br>0.0005(8)  |           | 0.0267(11) | -0.0009(10)             |
| C2   | 0.0350(15)<br>0.0069(10) |     | 0.0366(13)<br>0.0034(9)  |           | 0.0273(11) | -0.0009(11)             |
| C3   | 0.0369(15)<br>0.0140(10) |     | 0.0379(13)<br>0.0038(10) |           | 0.0310(11) | -0.0060(11)             |
| C4   | 0.0382(16)<br>0.0036(10) |     | 0.0355(13)<br>-0.0016(9) |           | 0.0314(11) | -0.0039(11)             |
| C5   | 0.0321(15)<br>0.0057(10) |     | 0.0360(13)<br>0.0051(9)  |           | 0.0312(11) | -0.0044(10)             |
| C6   | 0.0455(16)<br>0.0124(10) |     | 0.0295(12)<br>0.0001(9)  |           | 0.0270(11) | 0.0004(11)              |
| C7   | 0.0328(15)<br>0.0109(10) |     | 0.0349(13)<br>-0.0028(9) |           | 0.0335(11) | 0.0055(10)              |
| C8   | 0.0511(18)<br>0.0104(11) |     | 0.0337(13)<br>0.0015(9)  |           | 0.0287(11) | 0.0061(12)              |
| C9   | 0.0343(15)<br>0.0053(10) |     | 0.0361(13)<br>-0.0006(9) |           | 0.0291(11) | 0.0028(10)              |

|     |                          |                           |            |             |
|-----|--------------------------|---------------------------|------------|-------------|
| C10 | 0.0331(15)<br>0.0143(10) | 0.0330(12)<br>0.0030(9)   | 0.0354(12) | -0.0030(10) |
| C11 | 0.0293(14)<br>0.0118(10) | 0.0313(12)<br>-0.0040(10) | 0.0385(12) | -0.0041(10) |
| C12 | 0.0352(16)<br>0.0117(11) | 0.0433(14)<br>0.0042(10)  | 0.0353(12) | -0.0082(11) |
| C13 | 0.0319(15)<br>0.0115(11) | 0.0385(14)<br>0.0048(10)  | 0.0367(12) | -0.0004(11) |
| C14 | 0.0501(18)<br>0.0102(11) | 0.0455(15)<br>-0.0010(10) | 0.0306(12) | 0.0068(13)  |
| C15 | 0.0340(15)<br>0.0153(11) | 0.0322(12)<br>0.0039(10)  | 0.0391(12) | -0.0015(10) |
| C16 | 0.0388(15)<br>0.0114(10) | 0.0310(12)<br>0.0012(9)   | 0.0280(11) | -0.0037(10) |
| C17 | 0.0430(17)<br>0.0109(11) | 0.0425(14)<br>-0.0006(10) | 0.0323(12) | 0.0018(12)  |
| C18 | 0.0406(17)<br>0.0102(12) | 0.0560(17)<br>0.0110(12)  | 0.0404(14) | 0.0016(13)  |
| C19 | 0.0372(16)<br>0.0174(12) | 0.0451(15)<br>0.0027(12)  | 0.0496(14) | 0.0047(12)  |
| C20 | 0.0354(16)<br>0.0167(13) | 0.0401(14)<br>-0.0126(12) | 0.0561(16) | -0.0046(12) |

The general temperature factor expression:  $\exp(-2p2(a*2U11h2 + b*2U22k2 + c*2U33l2 + 2a*b*U12hk + 2a*c*U13hl + 2b*c*U23kl))$

Table 4. Bond lengths (Å)

| atom | atom | distance | atom | atom | distance |
|------|------|----------|------|------|----------|
| O1   | C5   | 1.423(3) | O1   | C6   | 1.363(3) |
| O2   | C2   | 1.371(3) | O2   | C5   | 1.430(3) |
| O3   | C2   | 1.201(3) | O4   | C3   | 1.417(3) |
| O5   | C7   | 1.223(3) | O6   | C8   | 1.347(3) |
| O6   | C17  | 1.444(3) | O7   | C8   | 1.210(4) |
| C1   | C6   | 1.329(3) | C1   | C8   | 1.465(3) |
| C1   | C16  | 1.499(4) | C2   | C9   | 1.480(3) |
| C3   | C7   | 1.526(4) | C3   | C12  | 1.528(3) |
| C4   | C5   | 1.487(3) | C4   | C9   | 1.324(4) |
| C7   | C11  | 1.483(4) | C9   | C14  | 1.489(4) |
| C10  | C11  | 1.531(3) | C10  | C15  | 1.500(4) |
| C10  | C16  | 1.518(3) | C11  | C15  | 1.533(3) |
| C11  | C20  | 1.505(4) | C12  | C13  | 1.532(4) |
| C13  | C15  | 1.521(4) | C13  | C18  | 1.521(3) |
| C13  | C19  | 1.536(4) | C16  | C17  | 1.534(3) |



Table 5. Bond lengths involving hydrogens (Å)

| atom | atom | distance | atom | atom | distance |
|------|------|----------|------|------|----------|
| O4   | H4   | 0.820    | C3   | H3   | 0.980    |
| C4   | H4A  | 0.930    | C5   | H5   | 0.980    |
| C6   | H6   | 0.930    | C10  | H10  | 0.980    |
| C12  | H12A | 0.970    | C12  | H12B | 0.970    |
| C14  | H14A | 0.960    | C14  | H14B | 0.960    |
| C14  | H14C | 0.960    | C15  | H15  | 0.980    |
| C16  | H16  | 0.980    | C17  | H17A | 0.970    |
| C17  | H17B | 0.970    | C18  | H18A | 0.960    |
| C18  | H18B | 0.960    | C18  | H18C | 0.960    |
| C19  | H19A | 0.960    | C19  | H19B | 0.960    |
| C19  | H19C | 0.960    | C20  | H20A | 0.960    |
| C20  | H20B | 0.960    | C20  | H20C | 0.960    |

Table 6. Bond angles (°)

| atom | atom | atom | angle      | atom | atom | atom | angle      |
|------|------|------|------------|------|------|------|------------|
| C5   | O1   | C6   | 115.45(19) |      | C2   | O2   | C5         |
|      |      |      | 108.59(17) |      |      |      |            |
| C8   | O6   | C17  | 111.07(18) |      | C6   | C1   | C8         |
|      |      |      |            |      |      |      | 120.4(2)   |
| C6   | C1   | C16  | 130.1(2)   | C8   | C1   | C16  | 109.51(19) |
| O2   | C2   | O3   | 121.0(2)   | O2   | C2   | C9   | 109.0(2)   |
| O3   | C2   | C9   | 130.0(2)   | O4   | C3   | C7   | 110.10(19) |
| O4   | C3   | C12  | 108.3(2)   | C7   | C3   | C12  | 115.3(2)   |
| C5   | C4   | C9   | 110.2(2)   | O1   | C5   | O2   | 108.61(18) |
| O1   | C5   | C4   | 109.0(2)   | O2   | C5   | C4   | 105.05(19) |
| O1   | C6   | C1   | 119.8(2)   | O5   | C7   | C3   | 118.5(2)   |
| O5   | C7   | C11  | 121.2(2)   | C3   | C7   | C11  | 120.24(19) |
| O6   | C8   | O7   | 121.0(2)   | O6   | C8   | C1   | 109.3(2)   |
| O7   | C8   | C1   | 129.7(2)   | C2   | C9   | C4   | 107.1(2)   |
| C2   | C9   | C14  | 121.9(2)   | C4   | C9   | C14  | 131.0(2)   |
| C11  | C10  | C15  | 60.75(16)  | C11  | C10  | C16  | 128.7(2)   |
| C15  | C10  | C16  | 129.3(2)   | C7   | C11  | C10  | 122.5(2)   |
| C7   | C11  | C15  | 114.0(2)   | C7   | C11  | C20  | 113.9(2)   |
| C10  | C11  | C15  | 58.61(16)  | C10  | C11  | C20  | 117.1(2)   |
| C15  | C11  | C20  | 119.6(2)   | C3   | C12  | C13  | 116.1(2)   |
| C12  | C13  | C15  | 112.7(2)   | C12  | C13  | C18  | 108.9(2)   |
| C12  | C13  | C19  | 109.3(2)   | C15  | C13  | C18  | 110.1(2)   |
| C15  | C13  | C19  | 106.3(2)   | C18  | C13  | C19  | 109.5(2)   |
| C10  | C15  | C11  | 60.63(16)  | C10  | C15  | C13  | 127.2(2)   |
| C11  | C15  | C13  | 118.5(2)   | C1   | C16  | C10  | 112.5(2)   |
| C1   | C16  | C17  | 101.6(2)   | C10  | C16  | C17  | 110.33(19) |
| O6   | C17  | C16  | 108.4(2)   |      |      |      |            |

Table 7. Bond angles involving hydrogens (o)

| atom | atom | atom | angle | atom | atom | atom | angle |
|------|------|------|-------|------|------|------|-------|
| C3   | O4   | H4   | 109.5 | O4   | C3   | H3   | 107.6 |
| C7   | C3   | H3   | 107.6 | C12  | C3   | H3   | 107.6 |
| C5   | C4   | H4A  | 124.9 | C9   | C4   | H4A  | 124.9 |
| O1   | C5   | H5   | 111.3 | O2   | C5   | H5   | 111.3 |
| C4   | C5   | H5   | 111.3 | O1   | C6   | H6   | 120.1 |
| C1   | C6   | H6   | 120.1 | C11  | C10  | H10  | 109.9 |
| C15  | C10  | H10  | 109.9 | C16  | C10  | H10  | 109.9 |
| C3   | C12  | H12A | 108.2 | C3   | C12  | H12B | 108.2 |
| C13  | C12  | H12A | 108.3 | C13  | C12  | H12B | 108.3 |
| H12A | C12  | H12B | 107.4 | C9   | C14  | H14A | 109.5 |
| C9   | C14  | H14B | 109.5 | C9   | C14  | H14C | 109.5 |
| H14A | C14  | H14B | 109.5 | H14A | C14  | H14C | 109.5 |
| H14B | C14  | H14C | 109.5 | C10  | C15  | H15  | 113.3 |
| C11  | C15  | H15  | 113.3 | C13  | C15  | H15  | 113.3 |
| C1   | C16  | H16  | 110.7 | C10  | C16  | H16  | 110.7 |
| C17  | C16  | H16  | 110.7 | O6   | C17  | H17A | 110.0 |
| O6   | C17  | H17B | 110.0 | C16  | C17  | H17A | 110.0 |
| C16  | C17  | H17B | 110.0 | H17A | C17  | H17B | 108.4 |
| C13  | C18  | H18A | 109.5 | C13  | C18  | H18B | 109.5 |
| C13  | C18  | H18C | 109.5 | H18A | C18  | H18B | 109.5 |
| H18A | C18  | H18C | 109.5 | H18B | C18  | H18C | 109.5 |
| C13  | C19  | H19A | 109.5 | C13  | C19  | H19B | 109.5 |
| C13  | C19  | H19C | 109.5 | H19A | C19  | H19B | 109.5 |
| H19A | C19  | H19C | 109.5 | H19B | C19  | H19C | 109.5 |
| C11  | C20  | H20A | 109.5 | C11  | C20  | H20B | 109.5 |
| C11  | C20  | H20C | 109.5 | H20A | C20  | H20B | 109.5 |
| H20A | C20  | H20C | 109.5 | H20B | C20  | H20C | 109.5 |

Table 8. Torsion Angles(o)

(Those having bond angles &gt; 160 or &lt; 20 degrees are excluded.)

| atom1 | atom2 | atom3       | atom4 | angle       | atom1 | atom2 | atom3 | atom4 |
|-------|-------|-------------|-------|-------------|-------|-------|-------|-------|
|       | angle |             |       |             |       |       |       |       |
| C5    | O1    | C6          | C1    | 171.04(19)  | C6    | O1    | C5    |       |
|       | O2    | -84.0(2)    |       |             |       |       |       |       |
| C6    | O1    | C5          | C4    | 162.10(18)  | C2    | O2    | C5    |       |
|       | O1    | -114.28(18) |       |             |       |       |       |       |
| C2    | O2    | C5          | C4    | 2.2(2)      | C5    | O2    | C2    | O3    |
|       |       | 178.9(2)    |       |             |       |       |       |       |
| C5    | O2    | C2          | C9    | -1.4(2)     | C8    | O6    | C17   | C16   |
|       |       | 0.4(3)      |       |             |       |       |       |       |
| C17   | O6    | C8          | O7    | -179.6(2)   | C17   | O6    | C8    |       |
|       | C1    | 1.4(3)      |       |             |       |       |       |       |
| C6    | C1    | C8          | O6    | 175.9(2)    | C6    | C1    | C8    | O7    |
|       |       | -2.9(4)     |       |             |       |       |       |       |
| C8    | C1    | C6          | O1    | 179.4(2)    | C6    | C1    | C16   | C10   |
|       |       | 66.3(3)     |       |             |       |       |       |       |
| C6    | C1    | C16         | C17   | -175.7(2)   | C16   | C1    | C6    |       |
|       | O1    | -2.3(4)     |       |             |       |       |       |       |
| C8    | C1    | C16         | C10   | -115.27(19) | C8    | C1    | C16   |       |
|       | C17   | 2.7(2)      |       |             |       |       |       |       |
| C16   | C1    | C8          | O6    | -2.7(3)     | C16   | C1    | C8    | O7    |
|       |       | 178.5(2)    |       |             |       |       |       |       |
| O2    | C2    | C9          | C4    | -0.1(3)     | O2    | C2    | C9    | C14   |
|       |       | 179.61(18)  |       |             |       |       |       |       |
| O3    | C2    | C9          | C4    | 179.6(2)    | O3    | C2    | C9    | C14   |
|       |       | -0.8(4)     |       |             |       |       |       |       |
| O4    | C3    | C7          | O5    | 23.5(3)     | O4    | C3    | C7    | C11   |
|       |       | -153.59(18) |       |             |       |       |       |       |
| O4    | C3    | C12         | C13   | 114.3(2)    | C7    | C3    | C12   | C13   |
|       |       | -9.6(3)     |       |             |       |       |       |       |
| C12   | C3    | C7          | O5    | 146.4(2)    | C12   | C3    | C7    | C11   |
|       |       | -30.7(3)    |       |             |       |       |       |       |

|     |            |          |     |           |     |     |     |     |
|-----|------------|----------|-----|-----------|-----|-----|-----|-----|
| C5  | C4         | C9       | C2  | 1.5(3)    | C5  | C4  | C9  | C14 |
|     | -178.2(2)  |          |     |           |     |     |     |     |
| C9  | C4         | C5       | O1  | 113.9(2)  | C9  | C4  | C5  | O2  |
|     | -2.3(3)    |          |     |           |     |     |     |     |
| O5  | C7         | C11      | C10 | 149.2(2)  | O5  | C7  | C11 | C15 |
|     | -143.9(2)  |          |     |           |     |     |     |     |
| O5  | C7         | C11      | C20 | -1.7(3)   | C3  | C7  | C11 | C10 |
|     | -33.8(3)   |          |     |           |     |     |     |     |
| C3  | C7         | C11      | C15 | 33.1(3)   | C3  | C7  | C11 | C20 |
|     | 175.34(19) |          |     |           |     |     |     |     |
| C11 | C10        | C15      | C11 | 0.00(11)  | C11 | C10 | C15 | C13 |
|     | -105.1(2)  |          |     |           |     |     |     |     |
| C15 | C10        | C11      | C7  | 100.2(2)  | C15 | C10 | C11 | C15 |
|     | -0.00(11)  |          |     |           |     |     |     |     |
| C15 | C10        | C11      | C20 | -109.8(2) |     | C11 | C10 | C16 |
|     | C1         | -88.6(3) |     |           |     |     |     |     |
| C11 | C10        | C16      | C17 | 158.7(2)  | C16 | C10 | C11 | C7  |
|     | -18.7(4)   |          |     |           |     |     |     |     |
| C16 | C10        | C11      | C15 | -118.8(3) |     | C16 | C10 | C11 |
|     | C20        | 131.4(2) |     |           |     |     |     |     |
| C15 | C10        | C16      | C1  | -169.8(2) |     | C15 | C10 | C16 |
|     | C17        | 77.5(3)  |     |           |     |     |     |     |
| C16 | C10        | C15      | C11 | 117.8(3)  | C16 | C10 | C15 | C13 |
|     | 12.7(4)    |          |     |           |     |     |     |     |
| C7  | C11        | C15      | C10 | -114.7(2) |     | C7  | C11 | C15 |
|     | C13        | 4.3(3)   |     |           |     |     |     |     |
| C10 | C11        | C15      | C10 | -0.00(11) |     | C10 | C11 | C15 |
|     | C13        | 119.0(2) |     |           |     |     |     |     |
| C20 | C11        | C15      | C10 | 105.4(2)  | C20 | C11 | C15 | C13 |
|     | -135.6(2)  |          |     |           |     |     |     |     |
| C3  | C12        | C13      | C15 | 44.0(3)   | C3  | C12 | C13 | C18 |
|     | 166.4(2)   |          |     |           |     |     |     |     |
| C3  | C12        | C13      | C19 | -73.9(3)  | C12 | C13 | C15 | C10 |
|     | 31.3(3)    |          |     |           |     |     |     |     |
| C12 | C13        | C15      | C11 | -41.9(3)  | C18 | C13 | C15 | C10 |
|     | -90.5(3)   |          |     |           |     |     |     |     |

|     |         |          |     |             |    |     |     |     |
|-----|---------|----------|-----|-------------|----|-----|-----|-----|
| C18 | C13     | C15      | C11 | -163.74(19) |    | C19 | C13 | C15 |
|     | C10     | 151.0(2) |     |             |    |     |     |     |
| C19 | C13     | C15      | C11 | 77.8(2)     | C1 | C16 | C17 | O6  |
|     | -1.9(2) |          |     |             |    |     |     |     |
| C10 | C16     | C17      | O6  | 117.6(2)    |    |     |     |     |

Table 9. Possible hydrogen bonds

| Donor | H  | Acceptor        | D...A | D-H      | H...A | D-H...A |                  |
|-------|----|-----------------|-------|----------|-------|---------|------------------|
| O4    | H4 | O3 <sup>1</sup> |       | 2.867(2) | 0.82  | 2.17    | 142.65           |
| O4    | H4 | O5              |       | 2.654(3) | 0.82  | 2.34    | 103.38 intramol. |

Symmetry Operators:

(1)  $-X+1,-Y,-Z+2$

Table 10. Intramolecular contacts less than 3.60 Å

| atom | atom | distance | atom | atom | distance |
|------|------|----------|------|------|----------|
| O1   | O5   | 3.410(3) | O1   | C2   | 3.214(3) |
| O1   | C7   | 3.127(3) | O1   | C9   | 3.241(3) |
| O1   | C10  | 3.260(3) | O1   | C11  | 3.232(3) |
| O1   | C16  | 2.973(3) | O2   | C6   | 3.013(3) |
| O3   | C4   | 3.428(3) | O3   | C5   | 3.416(3) |
| O3   | C14  | 3.058(3) | O4   | O5   | 2.654(3) |
| O4   | C13  | 3.499(3) | O4   | C19  | 3.593(3) |
| O5   | C4   | 3.201(3) | O5   | C9   | 3.530(3) |
| O5   | C15  | 3.596(3) | O5   | C20  | 2.747(3) |
| O6   | C6   | 3.537(3) | O6   | C10  | 3.472(3) |
| O7   | C6   | 2.918(3) | O7   | C17  | 3.447(4) |
| C1   | C5   | 3.585(3) | C1   | C11  | 3.544(3) |
| C3   | C10  | 3.167(4) | C3   | C15  | 2.979(4) |
| C3   | C16  | 3.279(4) | C3   | C19  | 3.201(4) |
| C6   | C10  | 3.236(3) | C7   | C13  | 2.865(3) |
| C7   | C16  | 3.301(3) | C7   | C19  | 3.232(4) |
| C8   | C10  | 3.483(4) | C10  | C12  | 3.108(4) |
| C10  | C18  | 3.494(4) | C11  | C12  | 3.011(4) |
| C11  | C19  | 3.217(4) | C12  | C16  | 3.212(4) |
| C13  | C16  | 3.393(4) | C15  | C17  | 3.421(4) |



Table 11. Intramolecular contacts less than 3.60 Å involving hydrogens

| atom | atom | distance | atom | atom | distance |
|------|------|----------|------|------|----------|
| O1   | H3   | 3.183    | O1   | H4A  | 2.778    |
| O1   | H10  | 3.598    | O1   | H16  | 2.993    |
| O1   | H20B | 3.176    | O2   | H4A  | 3.210    |
| O2   | H6   | 3.064    | O3   | H14A | 2.816    |
| O3   | H14B | 3.335    | O4   | H12A | 2.321    |
| O4   | H12B | 3.037    | O4   | H19A | 3.049    |
| O5   | H4   | 2.341    | O5   | H3   | 2.817    |
| O5   | H4A  | 3.043    | O5   | H14B | 3.435    |
| O5   | H19A | 3.172    | O5   | H20B | 2.757    |
| O5   | H20C | 2.625    | O6   | H10  | 3.391    |
| O6   | H16  | 3.069    | O7   | H6   | 2.658    |
| C1   | H10  | 2.649    | C1   | H17A | 2.994    |
| C1   | H17B | 3.019    | C2   | H4A  | 3.161    |
| C2   | H5   | 2.958    | C2   | H14A | 2.693    |
| C2   | H14B | 2.984    | C2   | H14C | 3.343    |
| C3   | H16  | 2.593    | C3   | H19A | 2.845    |
| C4   | H14A | 3.235    | C4   | H14B | 3.022    |
| C4   | H14C | 2.710    | C4   | H20B | 3.549    |
| C5   | H6   | 2.493    | C6   | H5   | 2.489    |
| C6   | H10  | 3.372    | C6   | H16  | 2.862    |
| C7   | H4   | 2.464    | C7   | H10  | 3.410    |
| C7   | H12A | 3.257    | C7   | H12B | 3.145    |
| C7   | H15  | 3.302    | C7   | H16  | 3.007    |
| C7   | H19A | 2.682    | C7   | H20A | 3.314    |
| C7   | H20B | 2.749    | C7   | H20C | 2.664    |
| C8   | H6   | 2.577    | C8   | H10  | 3.362    |
| C8   | H16  | 3.079    | C8   | H17A | 2.943    |
| C8   | H17B | 2.948    | C9   | H5   | 2.984    |
| C10  | H3   | 3.262    | C10  | H12B | 3.065    |
| C10  | H17A | 3.156    | C10  | H17B | 2.448    |
| C10  | H18A | 3.304    | C10  | H20A | 2.643    |
| C10  | H20B | 2.980    | C10  | H20C | 3.354    |

|     |      |       |     |      |       |
|-----|------|-------|-----|------|-------|
| C11 | H3   | 3.015 | C11 | H12B | 3.403 |
| C11 | H16  | 2.907 | C11 | H19A | 2.962 |
| C11 | H19C | 3.439 | C12 | H4   | 3.106 |
| C12 | H15  | 3.406 | C12 | H16  | 2.593 |
| C12 | H18A | 2.656 | C12 | H18B | 3.318 |

Table 11. Intramolecular contacts less than 3.60 Å involving hydrogens (continued)

| atom | atom | distance | atom | atom | distance |
|------|------|----------|------|------|----------|
| C12  | H18C | 2.663    | C12  | H19A | 2.634    |
| C12  | H19B | 2.730    | C12  | H19C | 3.331    |
| C13  | H3   | 3.264    | C13  | H10  | 3.447    |
| C13  | H16  | 3.199    | C14  | H4A  | 2.855    |
| C15  | H3   | 3.486    | C15  | H12A | 3.346    |
| C15  | H12B | 2.854    | C15  | H16  | 2.935    |
| C15  | H17B | 3.099    | C15  | H18A | 2.708    |
| C15  | H18B | 2.642    | C15  | H18C | 3.320    |
| C15  | H19A | 2.681    | C15  | H19B | 3.282    |
| C15  | H19C | 2.552    | C15  | H20A | 2.696    |
| C15  | H20B | 3.382    | C15  | H20C | 3.018    |
| C16  | H3   | 2.949    | C16  | H6   | 3.381    |
| C16  | H12B | 2.746    | C16  | H15  | 3.445    |
| C16  | H18A | 3.409    | C17  | H10  | 2.716    |
| C17  | H12B | 3.252    | C17  | H18A | 3.043    |
| C18  | H12A | 2.740    | C18  | H12B | 2.540    |
| C18  | H15  | 2.733    | C18  | H17B | 3.393    |
| C18  | H19A | 3.322    | C18  | H19B | 2.625    |
| C18  | H19C | 2.731    | C19  | H12A | 2.581    |
| C19  | H12B | 3.319    | C19  | H15  | 2.659    |
| C19  | H18A | 3.328    | C19  | H18B | 2.680    |
| C19  | H18C | 2.666    | C20  | H10  | 2.588    |
| C20  | H15  | 2.697    | H4   | H3   | 2.215    |
| H4   | H12A | 3.133    | H4   | H14B | 3.436    |
| H4   | H19A | 3.498    | H3   | H12A | 2.607    |
| H3   | H12B | 2.132    | H3   | H16  | 2.125    |
| H4A  | H5   | 2.510    | H4A  | H14B | 3.281    |
| H4A  | H14C | 2.702    | H4A  | H20B | 2.998    |
| H5   | H6   | 2.294    | H10  | H15  | 2.222    |
| H10  | H16  | 2.864    | H10  | H17A | 3.547    |
| H10  | H17B | 2.477    | H10  | H20A | 2.315    |
| H10  | H20B | 2.930    | H10  | H20C | 3.446    |

|      |      |       |      |      |       |
|------|------|-------|------|------|-------|
| H12A | H16  | 3.458 | H12A | H18A | 3.048 |
| H12A | H18B | 3.597 | H12A | H18C | 2.569 |
| H12A | H19A | 2.737 | H12A | H19B | 2.460 |
| H12A | H19C | 3.494 | H12B | H16  | 2.052 |
| H12B | H17A | 2.920 | H12B | H17B | 3.509 |

Table 11. Intramolecular contacts less than 3.60 Å involving hydrogens (continued)

| atom | atom | distance | atom | atom | distance |
|------|------|----------|------|------|----------|
| H12B | H18A | 2.353    | H12B | H18B | 3.443    |
| H12B | H18C | 2.759    | H12B | H19A | 3.558    |
| H12B | H19B | 3.520    | H15  | H17B | 3.377    |
| H15  | H18A | 3.044    | H15  | H18B | 2.521    |
| H15  | H18C | 3.594    | H15  | H19A | 3.003    |
| H15  | H19B | 3.513    | H15  | H19C | 2.394    |
| H15  | H20A | 2.464    | H15  | H20B | 3.562    |
| H15  | H20C | 3.005    | H16  | H17A | 2.213    |
| H16  | H17B | 2.722    | H16  | H18A | 3.363    |
| H17A | H18A | 2.793    | H17B | H18A | 2.649    |
| H17B | H18B | 3.590    | H18A | H19B | 3.511    |
| H18A | H19C | 3.598    | H18B | H19A | 3.574    |
| H18B | H19B | 2.879    | H18B | H19C | 2.565    |
| H18C | H19A | 3.513    | H18C | H19B | 2.436    |
| H18C | H19C | 3.017    | H19A | H20C | 3.379    |

Table 12. Intermolecular contacts less than 3.60 Å

| atom | atom             | distance | atom | atom             | distance |
|------|------------------|----------|------|------------------|----------|
| O2   | O6 <sup>1</sup>  | 3.331(2) | O2   | C14 <sup>2</sup> | 3.551(3) |
| O2   | C17 <sup>1</sup> | 3.277(3) | O3   | O4 <sup>3</sup>  | 2.867(2) |
| O3   | C14 <sup>3</sup> | 3.407(4) | O3   | C19 <sup>4</sup> | 3.549(3) |
| O4   | O3 <sup>3</sup>  | 2.867(2) | O4   | C4 <sup>5</sup>  | 3.259(3) |
| O4   | C5 <sup>5</sup>  | 3.146(3) | O5   | C15 <sup>6</sup> | 3.417(3) |
| O6   | O2 <sup>1</sup>  | 3.331(2) | O6   | C14 <sup>7</sup> | 3.399(3) |
| O7   | C3 <sup>1</sup>  | 3.313(3) | O7   | C5 <sup>8</sup>  | 3.595(3) |
| O7   | C6 <sup>8</sup>  | 3.292(3) | O7   | C12 <sup>1</sup> | 3.413(3) |
| O7   | C14 <sup>7</sup> | 3.500(3) | C2   | C4 <sup>2</sup>  | 3.556(3) |
| C2   | C9 <sup>2</sup>  | 3.590(4) | C3   | O7 <sup>1</sup>  | 3.313(3) |
| C4   | O4 <sup>9</sup>  | 3.259(3) | C4   | C2 <sup>2</sup>  | 3.556(3) |
| C5   | O4 <sup>9</sup>  | 3.146(3) | C5   | O7 <sup>8</sup>  | 3.595(3) |
| C6   | O7 <sup>8</sup>  | 3.292(3) | C6   | C12 <sup>9</sup> | 3.588(4) |
| C9   | C2 <sup>2</sup>  | 3.590(4) | C12  | O7 <sup>1</sup>  | 3.413(3) |
| C12  | C6 <sup>5</sup>  | 3.588(4) | C14  | O2 <sup>2</sup>  | 3.551(3) |
| C14  | O3 <sup>3</sup>  | 3.407(4) | C14  | O6 <sup>10</sup> | 3.399(3) |
| C14  | O7 <sup>10</sup> | 3.500(3) | C15  | O5 <sup>11</sup> | 3.417(3) |
| C17  | O2 <sup>1</sup>  | 3.277(3) | C19  | O3 <sup>12</sup> | 3.549(3) |

Symmetry Operators:

- |                  |                           |
|------------------|---------------------------|
| (1) -X+1,-Y,-Z+1 | (2) -X+2,-Y,-Z+2          |
| (3) -X+1,-Y,-Z+2 | (4) -X+1,Y+1/2-1,-Z+1/2+1 |
| (5) X-1,Y,Z      | (6) X,-Y+1,Z+1            |
| (7) X,Y,Z-1      | (8) -X+2,-Y,-Z+1          |
| (9) X+1,Y,Z      | (10) X,Y,Z+1              |
| (11) X,-Y+1,Z    | (12) -X+1,Y+1/2,-Z+1/2+1  |

Table 13. Intermolecular contacts less than 3.60 Å involving hydrogens

| atom | atom              | distance | atom | atom               | distance |
|------|-------------------|----------|------|--------------------|----------|
| O1   | H12A <sup>1</sup> | 3.065    | O1   | H17A <sup>2</sup>  | 3.217    |
| O2   | H14A <sup>3</sup> | 3.304    | O2   | H14C <sup>3</sup>  | 3.196    |
| O2   | H17A <sup>2</sup> | 2.583    | O2   | H17B <sup>2</sup>  | 3.566    |
| O2   | H19C <sup>4</sup> | 3.134    | O3   | H4 <sup>5</sup>    | 2.172    |
| O3   | H4A <sup>3</sup>  | 3.461    | O3   | H14B <sup>5</sup>  | 2.482    |
| O3   | H15 <sup>4</sup>  | 3.033    | O3   | H18B <sup>4</sup>  | 3.550    |
| O3   | H19C <sup>4</sup> | 2.600    | O4   | H4A <sup>6</sup>   | 2.955    |
| O4   | H5 <sup>6</sup>   | 2.429    | O4   | H14A <sup>5</sup>  | 2.858    |
| O4   | H15 <sup>7</sup>  | 3.505    | O4   | H18B <sup>7</sup>  | 2.704    |
| O5   | H10 <sup>7</sup>  | 3.003    | O5   | H15 <sup>7</sup>   | 2.685    |
| O5   | H17B <sup>7</sup> | 3.402    | O6   | H3 <sup>2</sup>    | 3.136    |
| O6   | H14A <sup>8</sup> | 3.134    | O6   | H14B <sup>8</sup>  | 3.076    |
| O6   | H14C <sup>8</sup> | 3.435    | O6   | H16 <sup>2</sup>   | 3.486    |
| O6   | H20C <sup>9</sup> | 2.948    | O7   | H3 <sup>2</sup>    | 2.618    |
| O7   | H5 <sup>10</sup>  | 2.808    | O7   | H6 <sup>10</sup>   | 2.389    |
| O7   | H12A <sup>2</sup> | 3.497    | O7   | H12B <sup>2</sup>  | 2.877    |
| O7   | H14A <sup>8</sup> | 2.862    | O7   | H14C <sup>8</sup>  | 3.382    |
| O7   | H16 <sup>2</sup>  | 3.213    | C1   | H12A <sup>1</sup>  | 3.523    |
| C1   | H16 <sup>2</sup>  | 3.253    | C1   | H17A <sup>2</sup>  | 3.397    |
| C2   | H4 <sup>5</sup>   | 3.095    | C2   | H14B <sup>5</sup>  | 3.160    |
| C2   | H19C <sup>4</sup> | 3.192    | C3   | H5 <sup>6</sup>    | 3.244    |
| C3   | H14A <sup>5</sup> | 3.488    | C4   | H4 <sup>1</sup>    | 3.491    |
| C4   | H14A <sup>3</sup> | 3.600    | C4   | H18B <sup>11</sup> | 3.528    |
| C5   | H4 <sup>1</sup>   | 3.555    | C5   | H12A <sup>1</sup>  | 3.385    |
| C5   | H14A <sup>3</sup> | 3.059    | C5   | H17A <sup>2</sup>  | 3.383    |
| C6   | H12A <sup>1</sup> | 2.855    | C6   | H12B <sup>1</sup>  | 3.441    |
| C6   | H16 <sup>2</sup>  | 3.559    | C6   | H17A <sup>2</sup>  | 2.907    |
| C8   | H3 <sup>2</sup>   | 2.964    | C8   | H6 <sup>10</sup>   | 3.521    |
| C8   | H12B <sup>2</sup> | 3.454    | C8   | H14A <sup>8</sup>  | 3.401    |
| C8   | H16 <sup>2</sup>  | 3.035    | C8   | H20C <sup>9</sup>  | 3.565    |
| C9   | H5 <sup>3</sup>   | 3.520    | C12  | H5 <sup>6</sup>    | 3.455    |
| C12  | H6 <sup>6</sup>   | 3.304    | C14  | H4 <sup>5</sup>    | 3.458    |

|     |                    |       |     |                   |       |
|-----|--------------------|-------|-----|-------------------|-------|
| C14 | H5 <sup>3</sup>    | 3.040 | C14 | H20A <sup>7</sup> | 3.176 |
| C17 | H19A <sup>9</sup>  | 3.401 | C17 | H20C <sup>9</sup> | 3.106 |
| C18 | H4A <sup>12</sup>  | 3.302 | C18 | H19A <sup>9</sup> | 3.084 |
| C18 | H20B <sup>12</sup> | 3.412 | C19 | H17B <sup>7</sup> | 3.233 |
| C19 | H18A <sup>7</sup>  | 3.212 | C19 | H18B <sup>7</sup> | 3.524 |



Table 13. Intermolecular contacts less than 3.60 Å involving hydrogens (continued)

| atom | atom               | distance | atom | atom               | distance |
|------|--------------------|----------|------|--------------------|----------|
| C19  | H20A <sup>6</sup>  | 3.439    | C19  | H20B <sup>6</sup>  | 3.370    |
| C20  | H14C <sup>9</sup>  | 3.311    | C20  | H17B <sup>7</sup>  | 3.362    |
| C20  | H18C <sup>11</sup> | 3.592    | C20  | H19B <sup>1</sup>  | 2.922    |
| H4   | O3 <sup>5</sup>    | 2.172    | H4   | C2 <sup>5</sup>    | 3.095    |
| H4   | C4 <sup>6</sup>    | 3.491    | H4   | C5 <sup>6</sup>    | 3.555    |
| H4   | C14 <sup>5</sup>   | 3.458    | H4   | H4A <sup>6</sup>   | 3.188    |
| H4   | H5 <sup>6</sup>    | 2.834    | H4   | H14A <sup>5</sup>  | 2.662    |
| H4   | H15 <sup>7</sup>   | 3.006    | H4   | H18B <sup>7</sup>  | 2.782    |
| H4   | H19C <sup>7</sup>  | 3.593    | H3   | O6 <sup>2</sup>    | 3.136    |
| H3   | O7 <sup>2</sup>    | 2.618    | H3   | C8 <sup>2</sup>    | 2.964    |
| H3   | H5 <sup>6</sup>    | 3.236    | H3   | H14A <sup>5</sup>  | 3.035    |
| H4A  | O3 <sup>3</sup>    | 3.461    | H4A  | O4 <sup>1</sup>    | 2.955    |
| H4A  | C18 <sup>11</sup>  | 3.302    | H4A  | H4 <sup>1</sup>    | 3.188    |
| H4A  | H18B <sup>11</sup> | 2.651    | H4A  | H18C <sup>11</sup> | 3.103    |
| H4A  | H19B <sup>11</sup> | 3.531    | H4A  | H19C <sup>11</sup> | 3.348    |
| H5   | O4 <sup>1</sup>    | 2.429    | H5   | O7 <sup>10</sup>   | 2.808    |
| H5   | C3 <sup>1</sup>    | 3.244    | H5   | C9 <sup>3</sup>    | 3.520    |
| H5   | C12 <sup>1</sup>   | 3.455    | H5   | C14 <sup>3</sup>   | 3.040    |
| H5   | H4 <sup>1</sup>    | 2.834    | H5   | H3 <sup>1</sup>    | 3.236    |
| H5   | H12A <sup>1</sup>  | 2.908    | H5   | H14A <sup>3</sup>  | 2.299    |
| H5   | H14C <sup>3</sup>  | 3.137    | H6   | O7 <sup>10</sup>   | 2.389    |
| H6   | C8 <sup>10</sup>   | 3.521    | H6   | C12 <sup>1</sup>   | 3.304    |
| H6   | H6 <sup>10</sup>   | 3.320    | H6   | H12A <sup>1</sup>  | 2.773    |
| H6   | H12B <sup>1</sup>  | 2.983    | H6   | H12B <sup>2</sup>  | 3.429    |
| H6   | H16 <sup>2</sup>   | 3.565    | H6   | H17A <sup>2</sup>  | 2.893    |
| H10  | O5 <sup>9</sup>    | 3.003    | H10  | H18C <sup>1</sup>  | 2.945    |
| H10  | H20C <sup>9</sup>  | 3.037    | H12A | O1 <sup>6</sup>    | 3.065    |
| H12A | O7 <sup>2</sup>    | 3.497    | H12A | C1 <sup>6</sup>    | 3.523    |
| H12A | C5 <sup>6</sup>    | 3.385    | H12A | C6 <sup>6</sup>    | 2.855    |
| H12A | H5 <sup>6</sup>    | 2.908    | H12A | H6 <sup>6</sup>    | 2.773    |
| H12A | H20B <sup>6</sup>  | 3.115    | H12B | O7 <sup>2</sup>    | 2.877    |
| H12B | C6 <sup>6</sup>    | 3.441    | H12B | C8 <sup>2</sup>    | 3.454    |

|      |                  |       |      |                  |       |
|------|------------------|-------|------|------------------|-------|
| H12B | H6 <sup>6</sup>  | 2.983 | H12B | H6 <sup>2</sup>  | 3.429 |
| H14A | O2 <sup>3</sup>  | 3.304 | H14A | O4 <sup>5</sup>  | 2.858 |
| H14A | O6 <sup>13</sup> | 3.134 | H14A | O7 <sup>13</sup> | 2.862 |
| H14A | C3 <sup>5</sup>  | 3.488 | H14A | C4 <sup>3</sup>  | 3.600 |
| H14A | C5 <sup>3</sup>  | 3.059 | H14A | C8 <sup>13</sup> | 3.401 |

Table 13. Intermolecular contacts less than 3.60 Å involving hydrogens (continued)

| atom | atom               | distance | atom | atom               | distance |
|------|--------------------|----------|------|--------------------|----------|
| H14A | H4 <sup>5</sup>    | 2.662    | H14A | H3 <sup>5</sup>    | 3.035    |
| H14A | H5 <sup>3</sup>    | 2.299    | H14B | O3 <sup>5</sup>    | 2.482    |
| H14B | O6 <sup>13</sup>   | 3.076    | H14B | C2 <sup>5</sup>    | 3.160    |
| H14B | H15 <sup>7</sup>   | 3.307    | H14B | H20A <sup>7</sup>  | 2.955    |
| H14B | H20C <sup>7</sup>  | 3.494    | H14C | O2 <sup>3</sup>    | 3.196    |
| H14C | O6 <sup>13</sup>   | 3.435    | H14C | O7 <sup>13</sup>   | 3.382    |
| H14C | C20 <sup>7</sup>   | 3.311    | H14C | H5 <sup>3</sup>    | 3.137    |
| H14C | H19B <sup>11</sup> | 3.055    | H14C | H19C <sup>11</sup> | 3.302    |
| H14C | H20A <sup>7</sup>  | 2.546    | H14C | H20C <sup>7</sup>  | 3.287    |
| H15  | O3 <sup>14</sup>   | 3.033    | H15  | O4 <sup>9</sup>    | 3.505    |
| H15  | O5 <sup>9</sup>    | 2.685    | H15  | H4 <sup>9</sup>    | 3.006    |
| H15  | H14B <sup>9</sup>  | 3.307    | H16  | O6 <sup>2</sup>    | 3.486    |
| H16  | O7 <sup>2</sup>    | 3.213    | H16  | C1 <sup>2</sup>    | 3.253    |
| H16  | C6 <sup>2</sup>    | 3.559    | H16  | C8 <sup>2</sup>    | 3.035    |
| H16  | H6 <sup>2</sup>    | 3.565    | H17A | O1 <sup>2</sup>    | 3.217    |
| H17A | O2 <sup>2</sup>    | 2.583    | H17A | C1 <sup>2</sup>    | 3.397    |
| H17A | C5 <sup>2</sup>    | 3.383    | H17A | C6 <sup>2</sup>    | 2.907    |
| H17A | H6 <sup>2</sup>    | 2.893    | H17A | H19A <sup>9</sup>  | 3.426    |
| H17A | H19C <sup>9</sup>  | 3.462    | H17B | O2 <sup>2</sup>    | 3.566    |
| H17B | O5 <sup>9</sup>    | 3.402    | H17B | C19 <sup>9</sup>   | 3.233    |
| H17B | C20 <sup>9</sup>   | 3.362    | H17B | H19A <sup>9</sup>  | 2.561    |
| H17B | H19C <sup>9</sup>  | 3.047    | H17B | H20C <sup>9</sup>  | 2.485    |
| H18A | C19 <sup>9</sup>   | 3.212    | H18A | H19A <sup>9</sup>  | 2.532    |
| H18A | H19B <sup>9</sup>  | 3.162    | H18A | H19C <sup>9</sup>  | 3.514    |
| H18A | H20B <sup>12</sup> | 3.464    | H18B | O3 <sup>14</sup>   | 3.550    |
| H18B | O4 <sup>9</sup>    | 2.704    | H18B | C4 <sup>12</sup>   | 3.528    |
| H18B | C19 <sup>9</sup>   | 3.524    | H18B | H4 <sup>9</sup>    | 2.782    |
| H18B | H4A <sup>12</sup>  | 2.651    | H18B | H19A <sup>9</sup>  | 2.774    |
| H18B | H19B <sup>9</sup>  | 3.426    | H18B | H20B <sup>12</sup> | 3.182    |
| H18C | C20 <sup>12</sup>  | 3.592    | H18C | H4A <sup>12</sup>  | 3.103    |
| H18C | H10 <sup>6</sup>   | 2.945    | H18C | H20A <sup>6</sup>  | 3.446    |
| H18C | H20B <sup>12</sup> | 3.041    | H18C | H20C <sup>12</sup> | 3.263    |

|      |                   |       |      |                    |       |
|------|-------------------|-------|------|--------------------|-------|
| H19A | C17 <sup>7</sup>  | 3.401 | H19A | C18 <sup>7</sup>   | 3.084 |
| H19A | H17A <sup>7</sup> | 3.426 | H19A | H17B <sup>7</sup>  | 2.561 |
| H19A | H18A <sup>7</sup> | 2.532 | H19A | H18B <sup>7</sup>  | 2.774 |
| H19A | H20B <sup>6</sup> | 3.477 | H19B | C20 <sup>6</sup>   | 2.922 |
| H19B | H4A <sup>12</sup> | 3.531 | H19B | H14C <sup>12</sup> | 3.055 |

Table 13. Intermolecular contacts less than 3.60 Å involving hydrogens (continued)

| atom | atom               | distance | atom | atom               | distance |
|------|--------------------|----------|------|--------------------|----------|
| H19B | H18A <sup>7</sup>  | 3.162    | H19B | H18B <sup>7</sup>  | 3.426    |
| H19B | H20A <sup>6</sup>  | 2.484    | H19B | H20B <sup>6</sup>  | 2.514    |
| H19B | H20C <sup>6</sup>  | 3.478    | H19C | O2 <sup>14</sup>   | 3.134    |
| H19C | O3 <sup>14</sup>   | 2.600    | H19C | C2 <sup>14</sup>   | 3.192    |
| H19C | H4 <sup>9</sup>    | 3.593    | H19C | H4A <sup>12</sup>  | 3.348    |
| H19C | H14C <sup>12</sup> | 3.302    | H19C | H17A <sup>7</sup>  | 3.462    |
| H19C | H17B <sup>7</sup>  | 3.047    | H19C | H18A <sup>7</sup>  | 3.514    |
| H20A | C14 <sup>9</sup>   | 3.176    | H20A | C19 <sup>1</sup>   | 3.439    |
| H20A | H14B <sup>9</sup>  | 2.955    | H20A | H14C <sup>9</sup>  | 2.546    |
| H20A | H18C <sup>1</sup>  | 3.446    | H20A | H19B <sup>1</sup>  | 2.484    |
| H20B | C18 <sup>11</sup>  | 3.412    | H20B | C19 <sup>1</sup>   | 3.370    |
| H20B | H12A <sup>1</sup>  | 3.115    | H20B | H18A <sup>11</sup> | 3.464    |
| H20B | H18B <sup>11</sup> | 3.182    | H20B | H18C <sup>11</sup> | 3.041    |
| H20B | H19A <sup>1</sup>  | 3.477    | H20B | H19B <sup>1</sup>  | 2.514    |
| H20C | O6 <sup>7</sup>    | 2.948    | H20C | C8 <sup>7</sup>    | 3.565    |
| H20C | C17 <sup>7</sup>   | 3.106    | H20C | H10 <sup>7</sup>   | 3.037    |
| H20C | H14B <sup>9</sup>  | 3.494    | H20C | H14C <sup>9</sup>  | 3.287    |
| H20C | H17B <sup>7</sup>  | 2.485    | H20C | H18C <sup>11</sup> | 3.263    |
| H20C | H19B <sup>1</sup>  | 3.478    |      |                    |          |

Symmetry Operators:

- |                   |                           |
|-------------------|---------------------------|
| (1) X+1,Y,Z       | (2) -X+1,-Y,-Z+1          |
| (3) -X+2,-Y,-Z+2  | (4) -X+1,Y+1/2-1,-Z+1/2+1 |
| (5) -X+1,-Y,-Z+2  | (6) X-1,Y,Z               |
| (7) X,-Y+1,Z+1    | (8) X,Y,Z-1               |
| (9) X,-Y+1,Z      | (10) -X+2,-Y,-Z+1         |
| (11) X+1,-Y+1,Z+1 | (12) X-1,-Y+1,Z           |
| (13) X,Y,Z+1      | (14) -X+1,Y+1/2,-Z+1/2+1  |

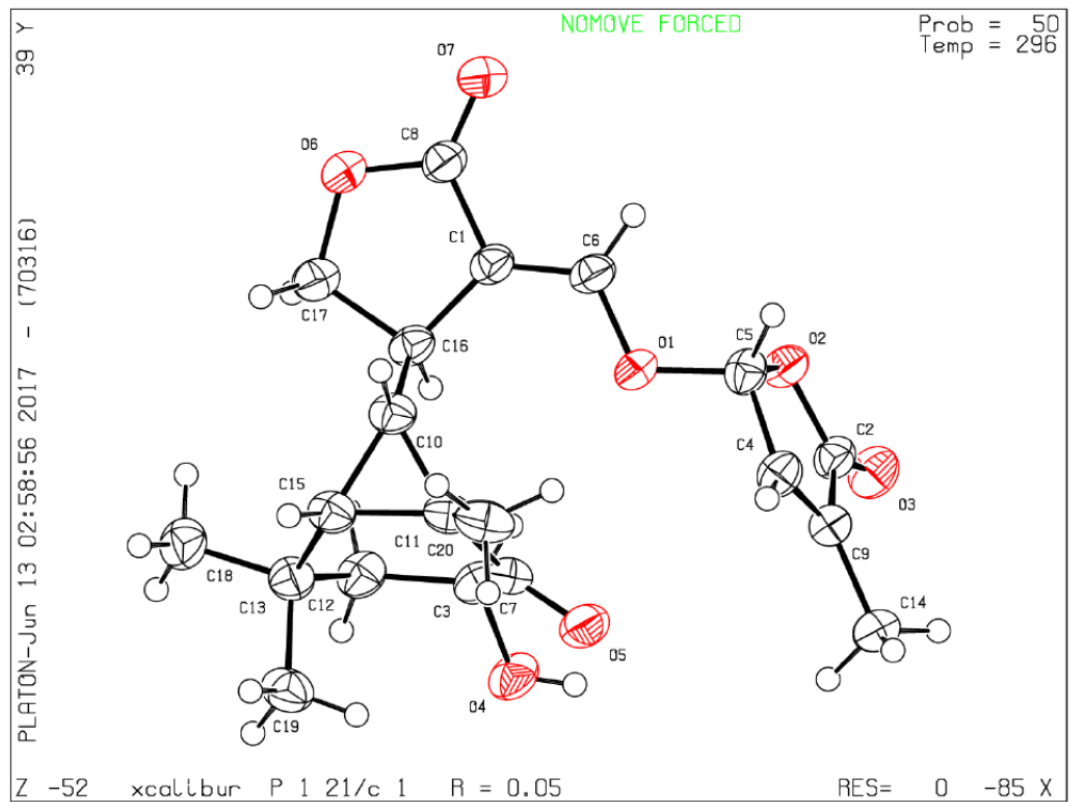

Supplementary Fig. 6. ORTEP of C2'-epi avenaol with probability ellipsoids.

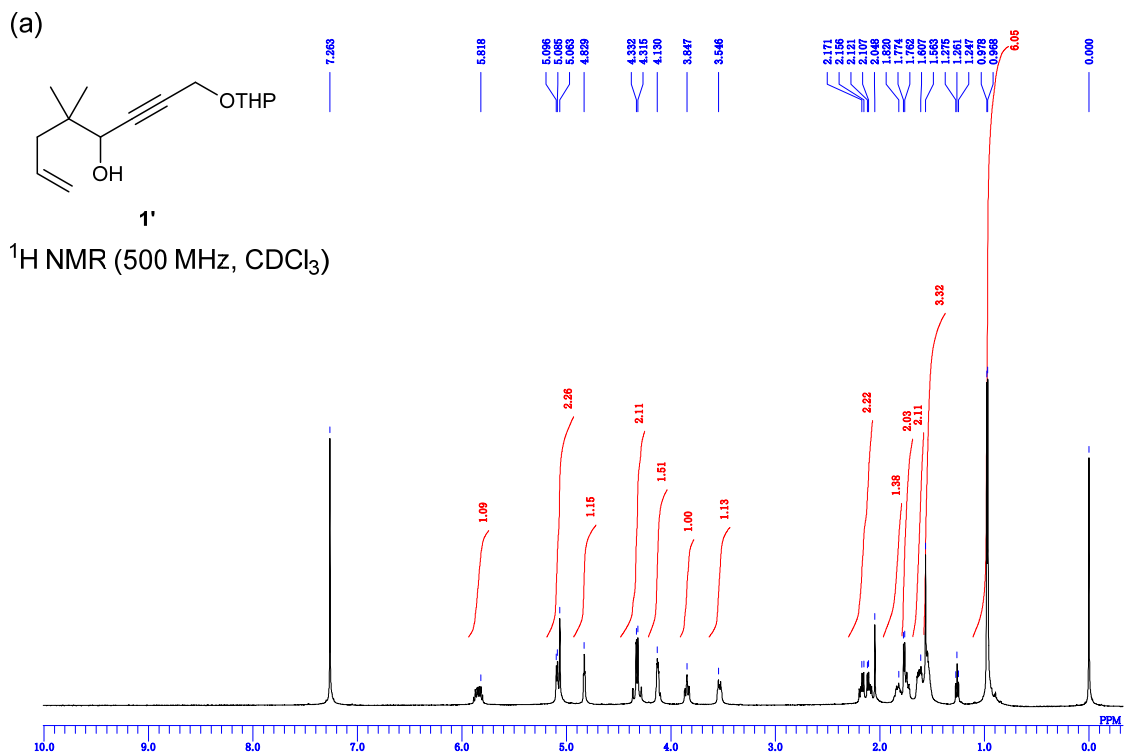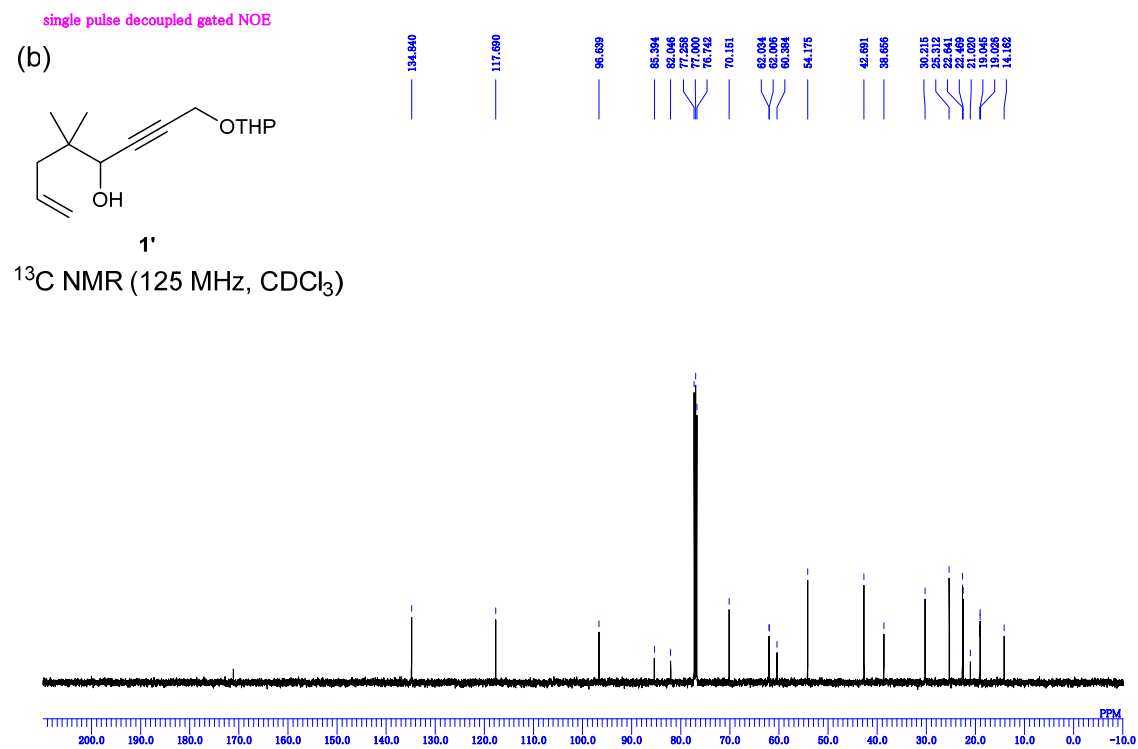

Supplementary Fig. 7.  $^1\text{H}$  (a) and  $^{13}\text{C}$  NMR (b) spectra of **1'**

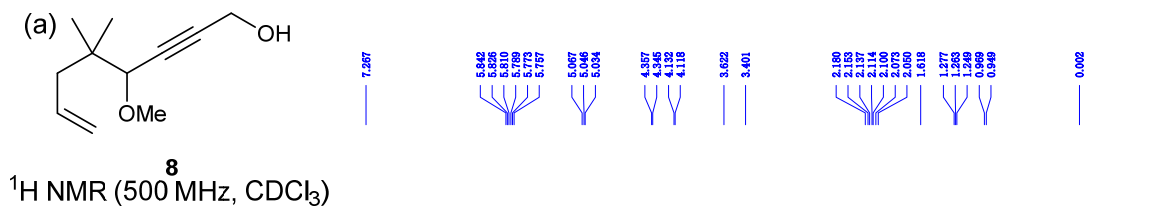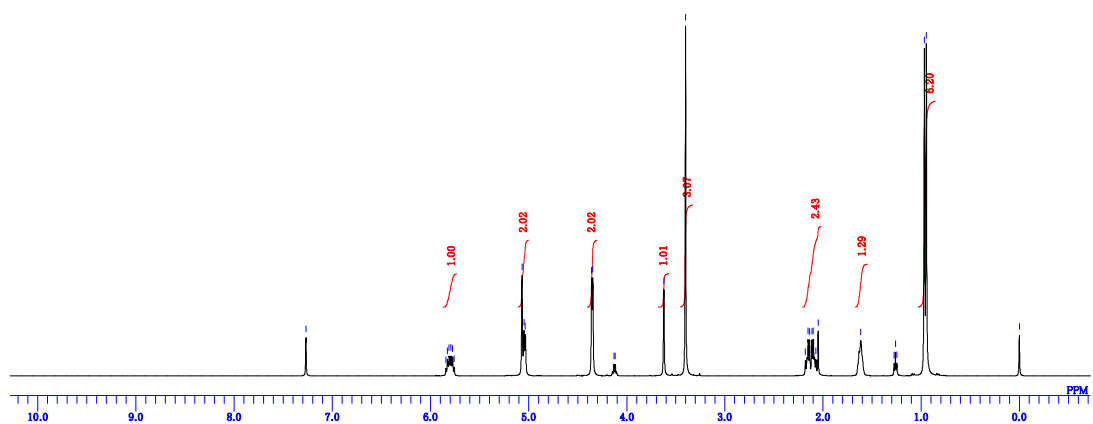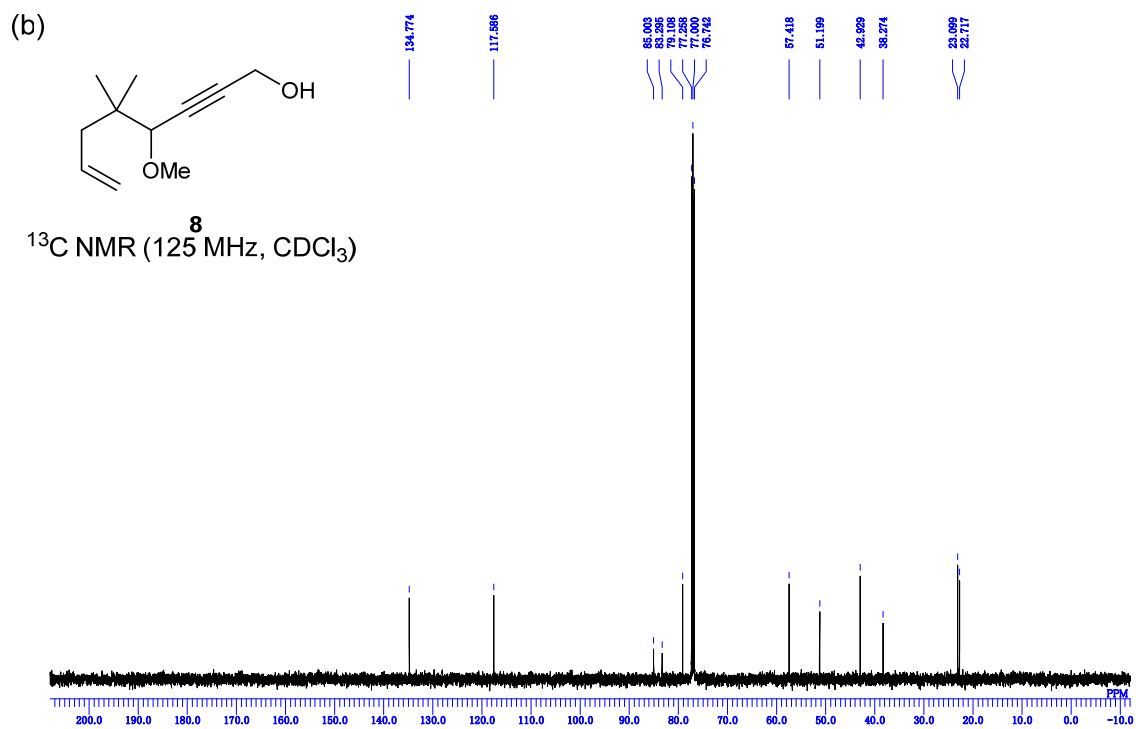

Supplementary Fig. 8.  $^1\text{H}$  (a) and  $^{13}\text{C}$  NMR (b) spectra of **8**



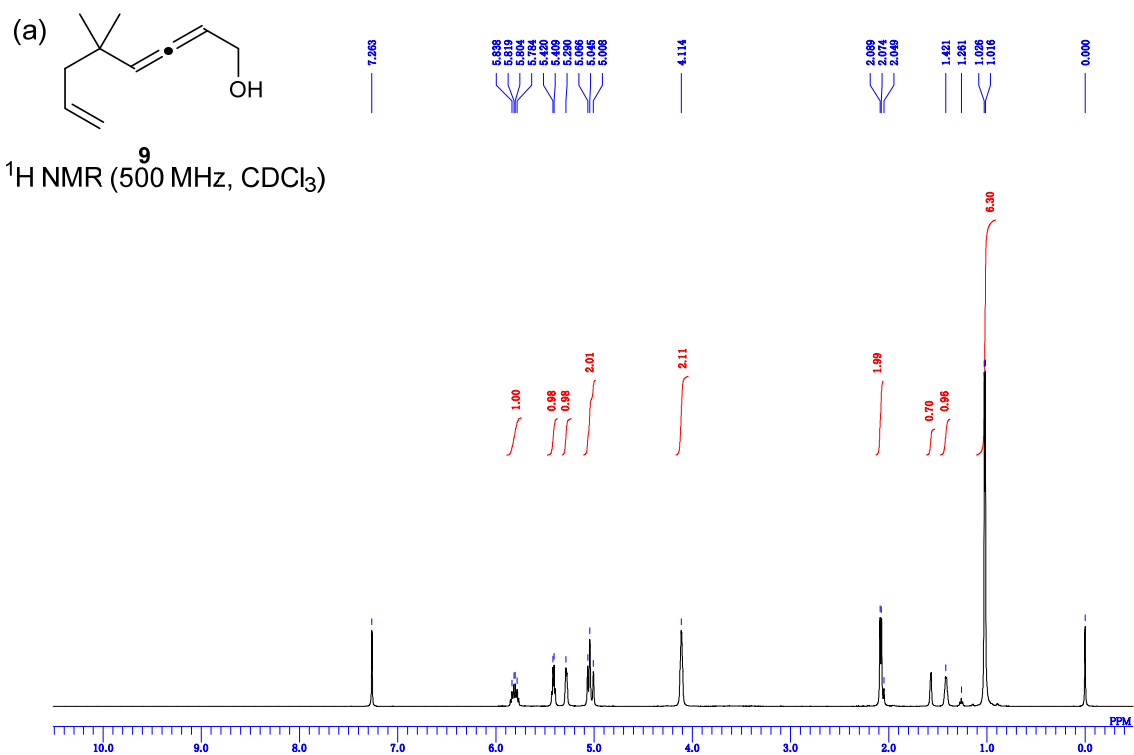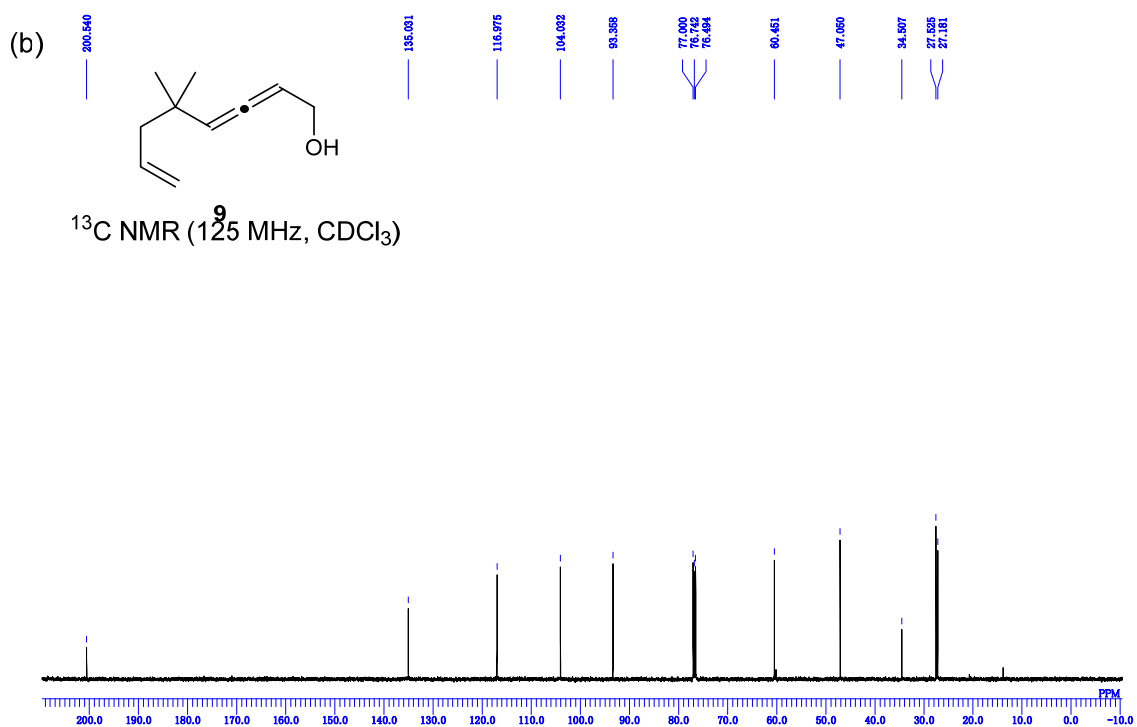

Supplementary Fig. 9.  $^1\text{H}$  (a) and  $^{13}\text{C}$  NMR (b) spectra of **9**

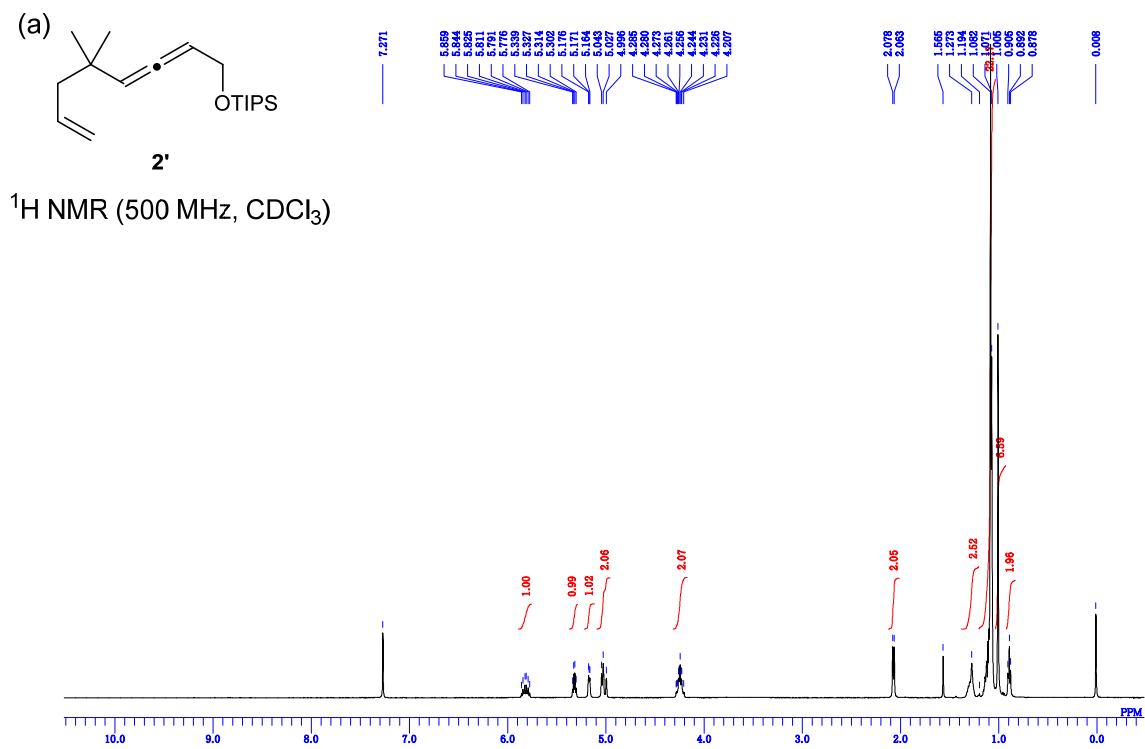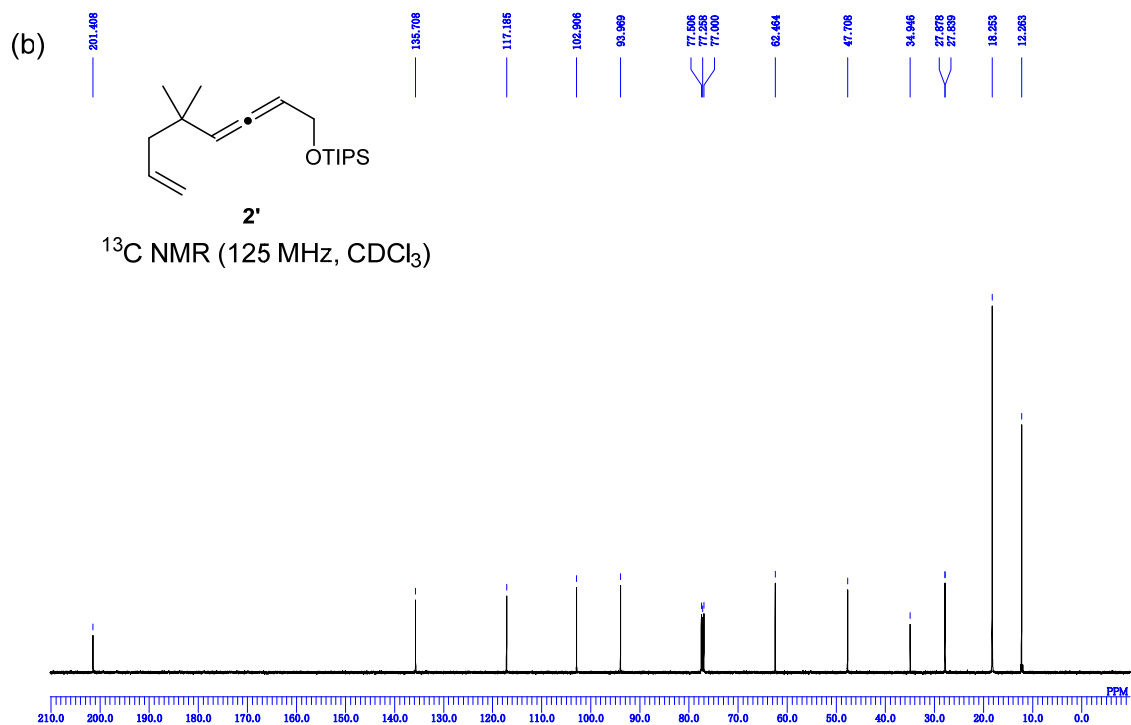

Supplementary Fig. 10.  $^1\text{H}$  (a) and  $^{13}\text{C}$  NMR (b) spectra of **2'**

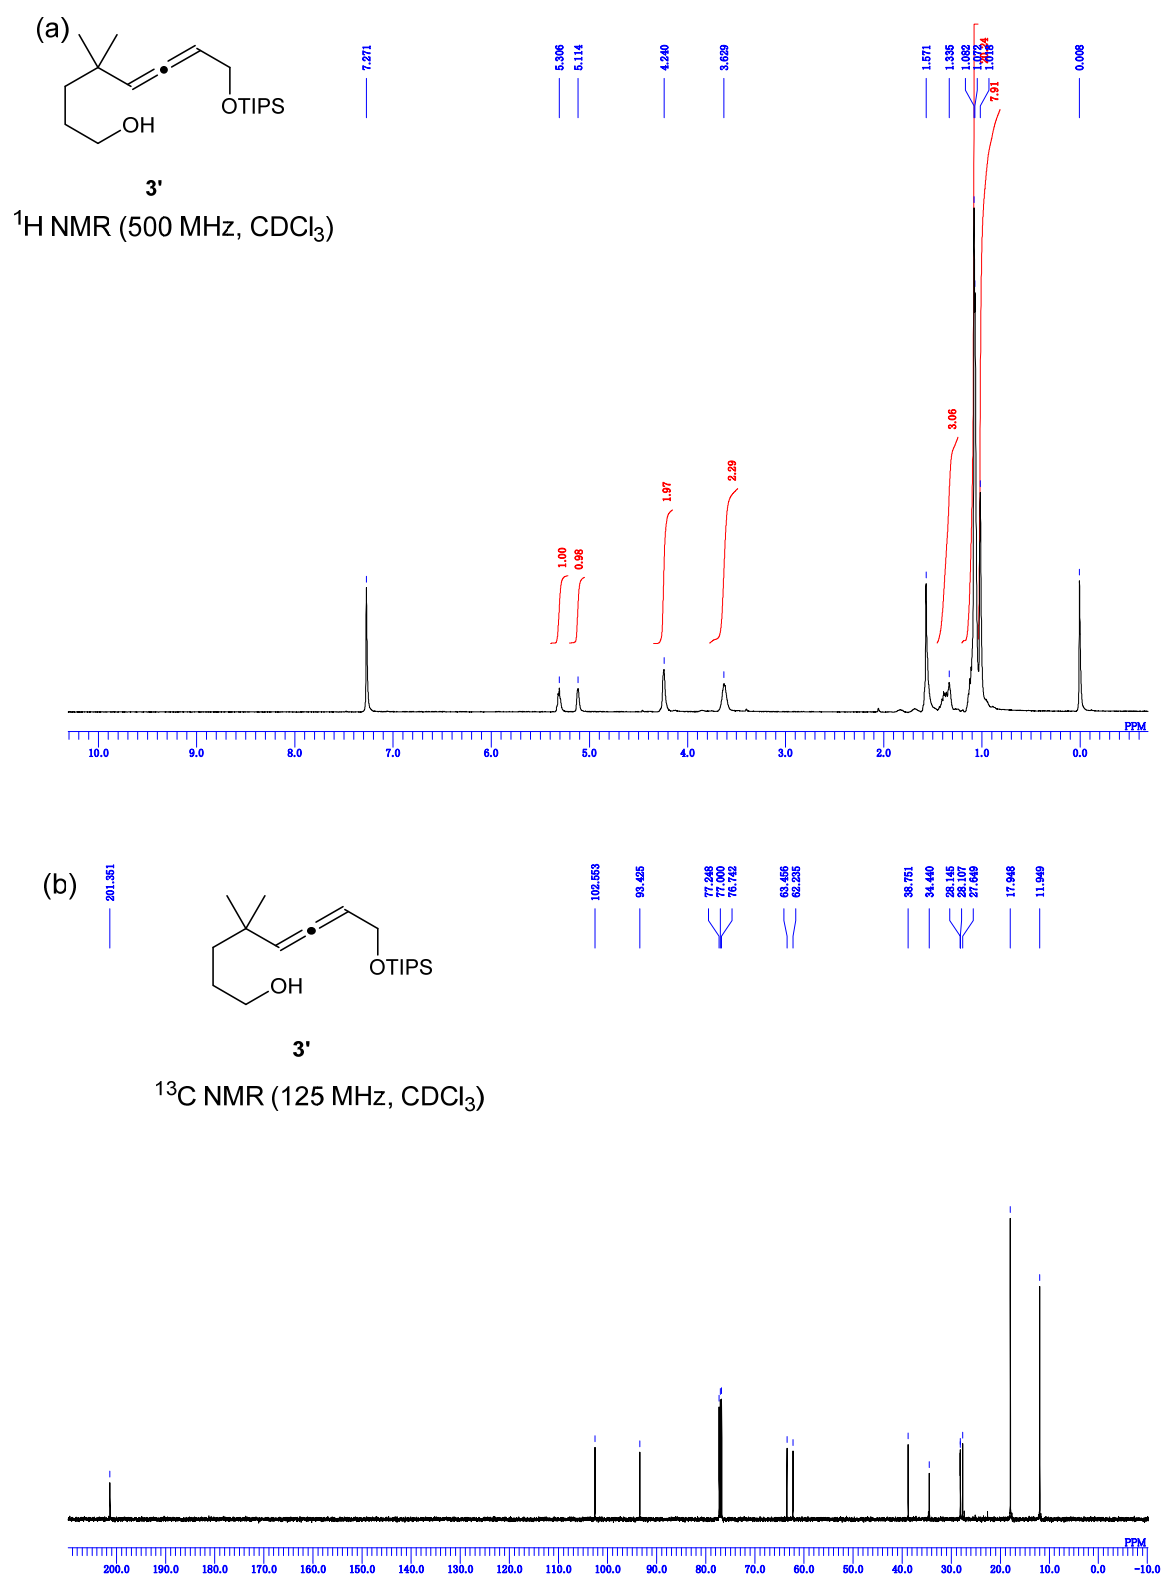

Supplementary Fig. 11.  $^1\text{H}$  (a) and  $^{13}\text{C}$  NMR (b) spectra of **3'**

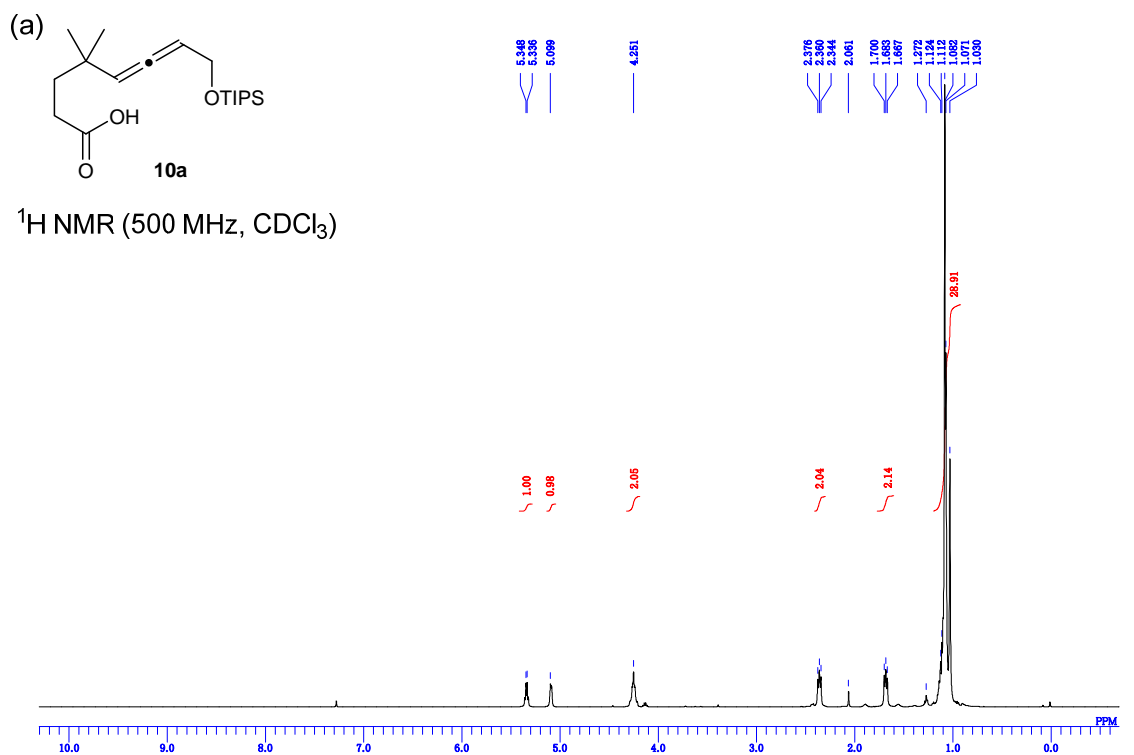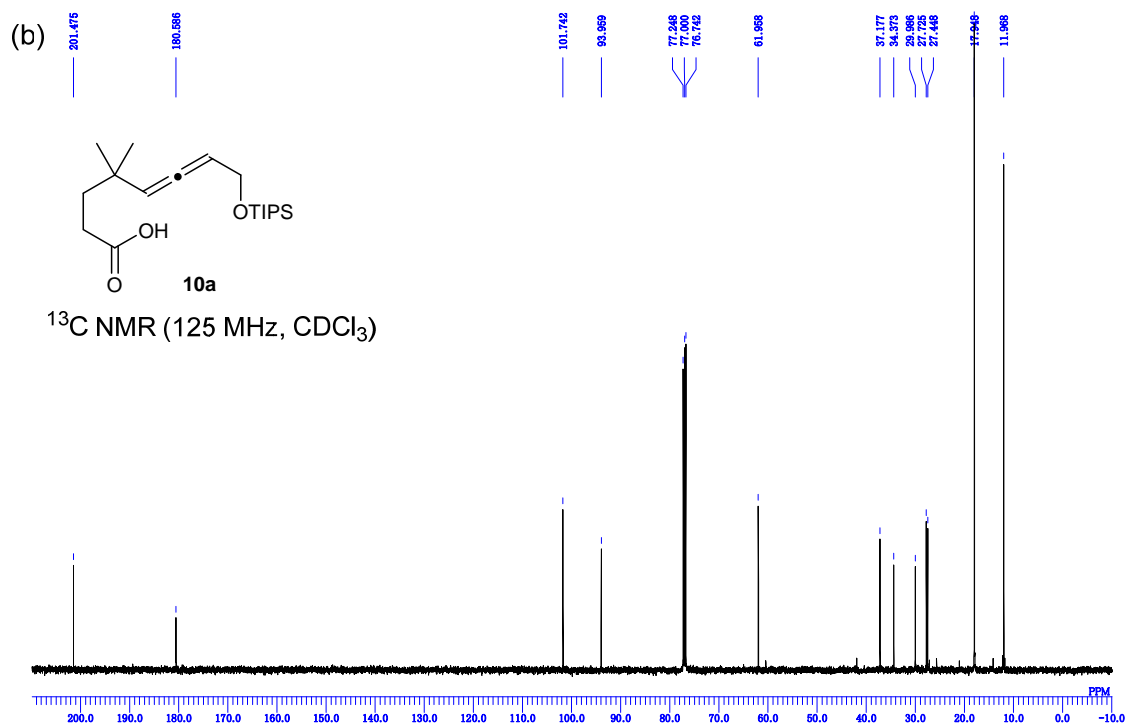

Supplementary Fig. 12.  $^1\text{H}$  (a) and  $^{13}\text{C}$  NMR (b) spectra of 10a

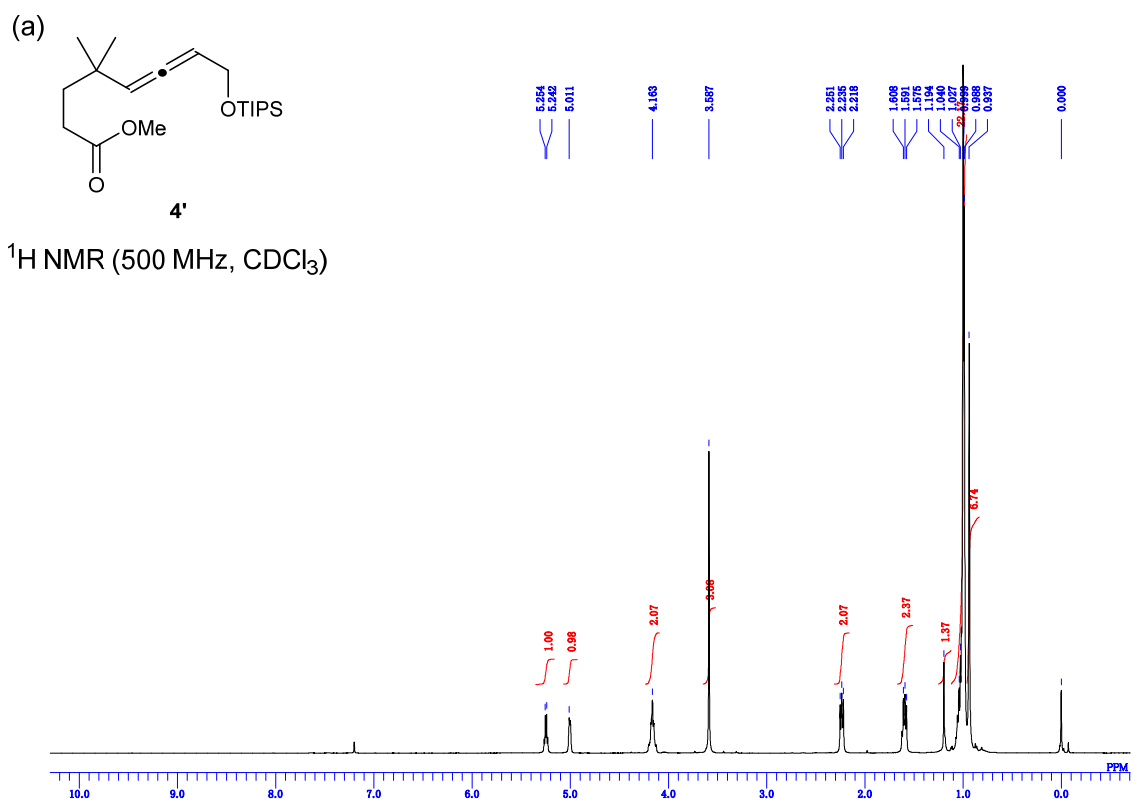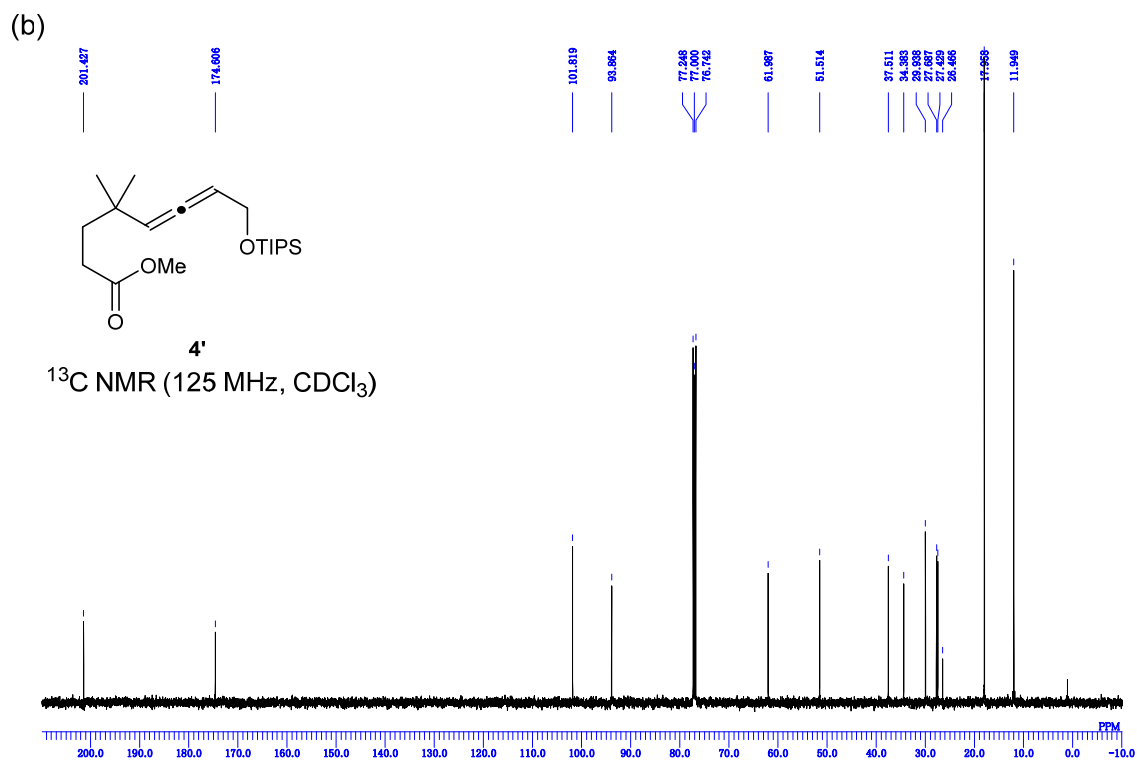

Supplementary Fig. 13.  $^1\text{H}$  (a) and  $^{13}\text{C}$  NMR (b) spectra of 4'

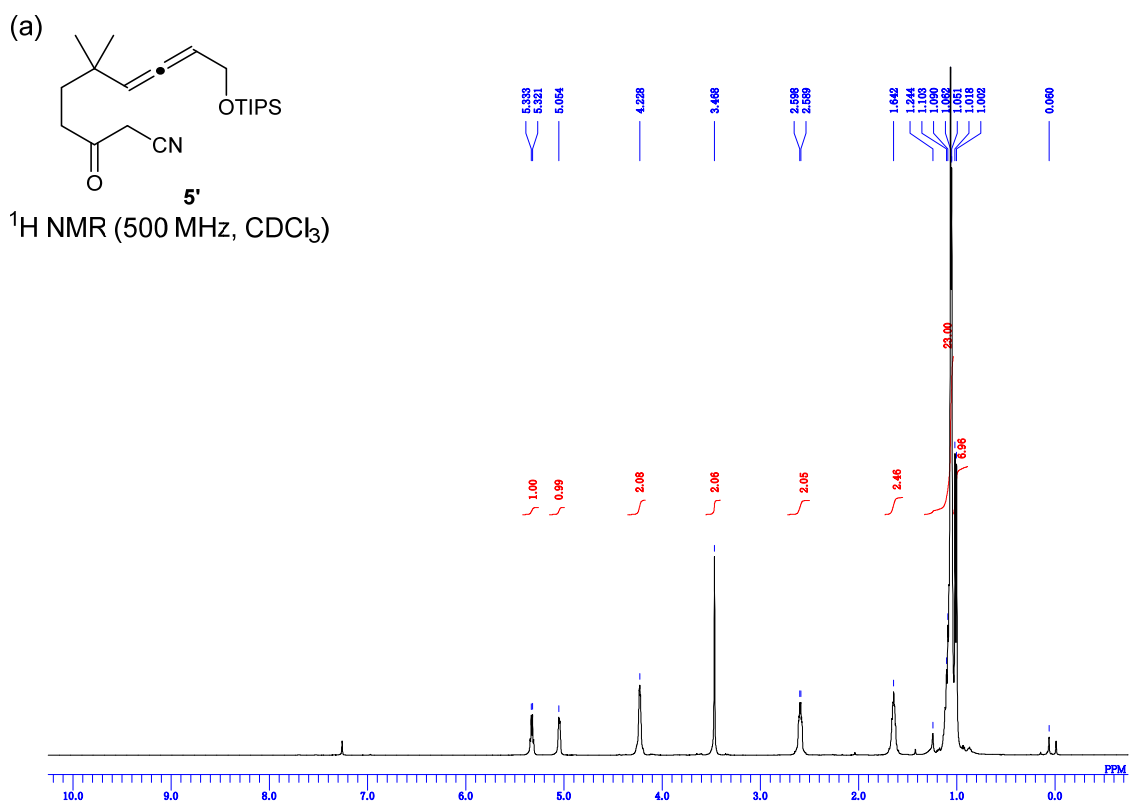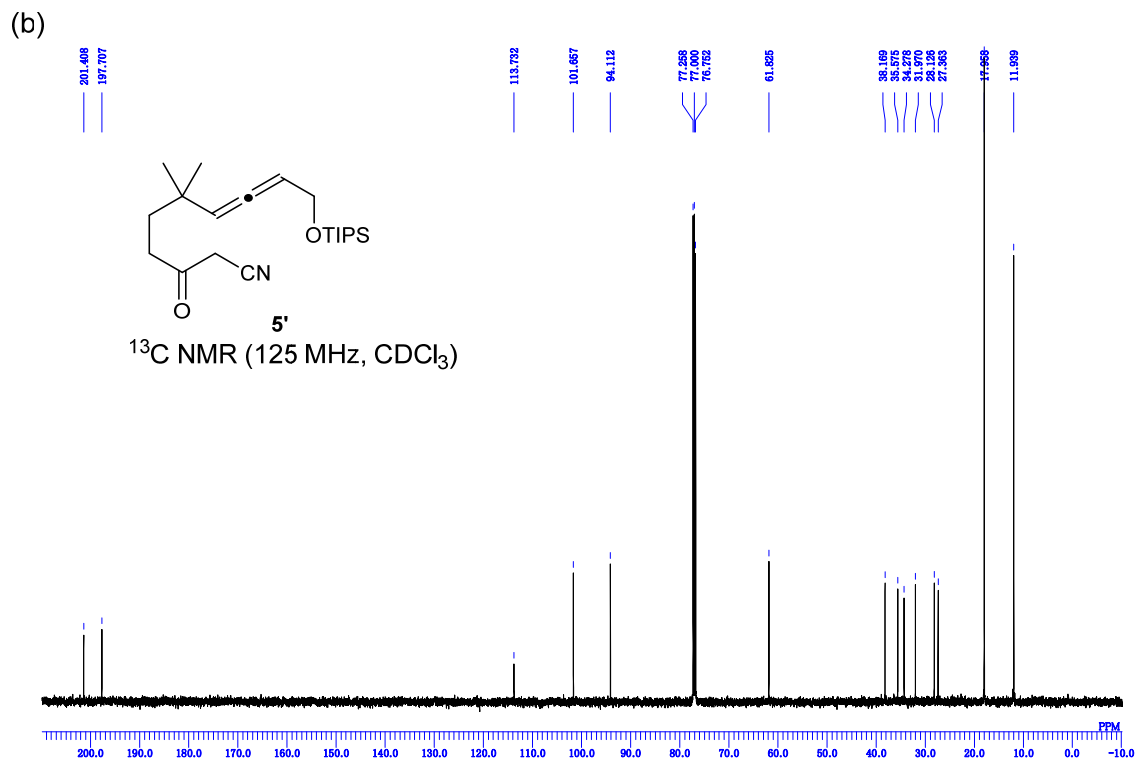

Supplementary Fig. 14.  $^1\text{H}$  (a) and  $^{13}\text{C}$  NMR (b) spectra of **5'**

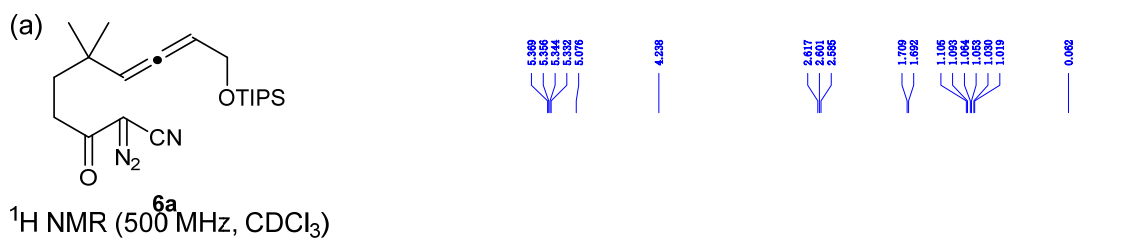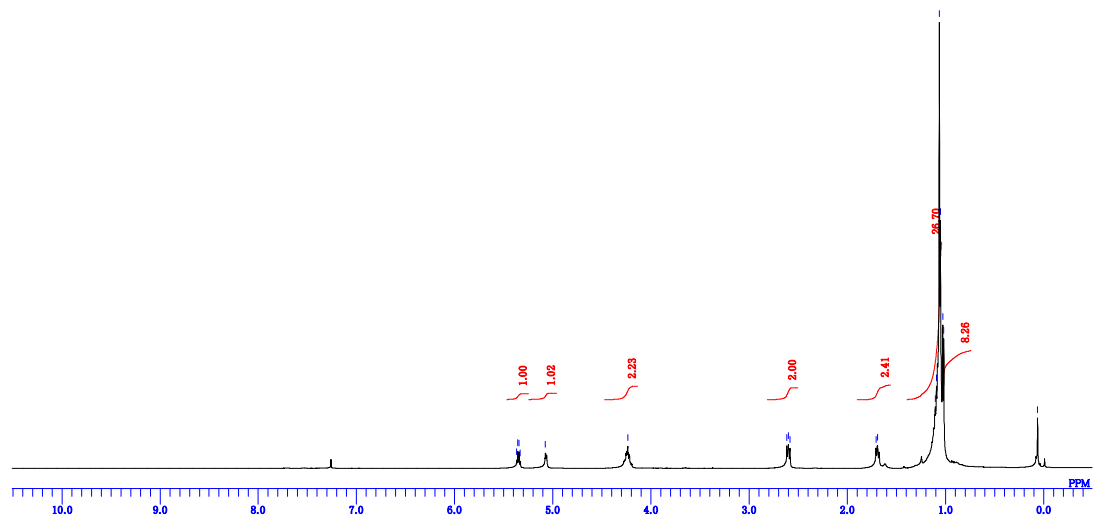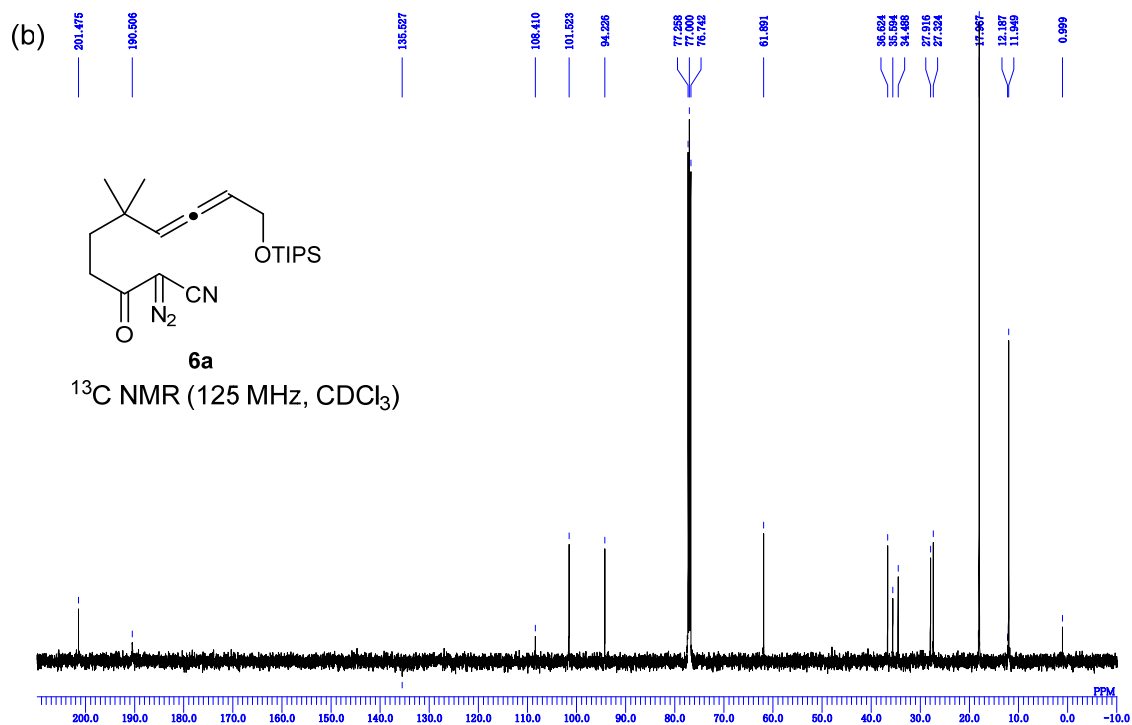

Supplementary Fig. 15.  $^1\text{H}$  (a) and  $^{13}\text{C}$  NMR (b) spectra of **6a**

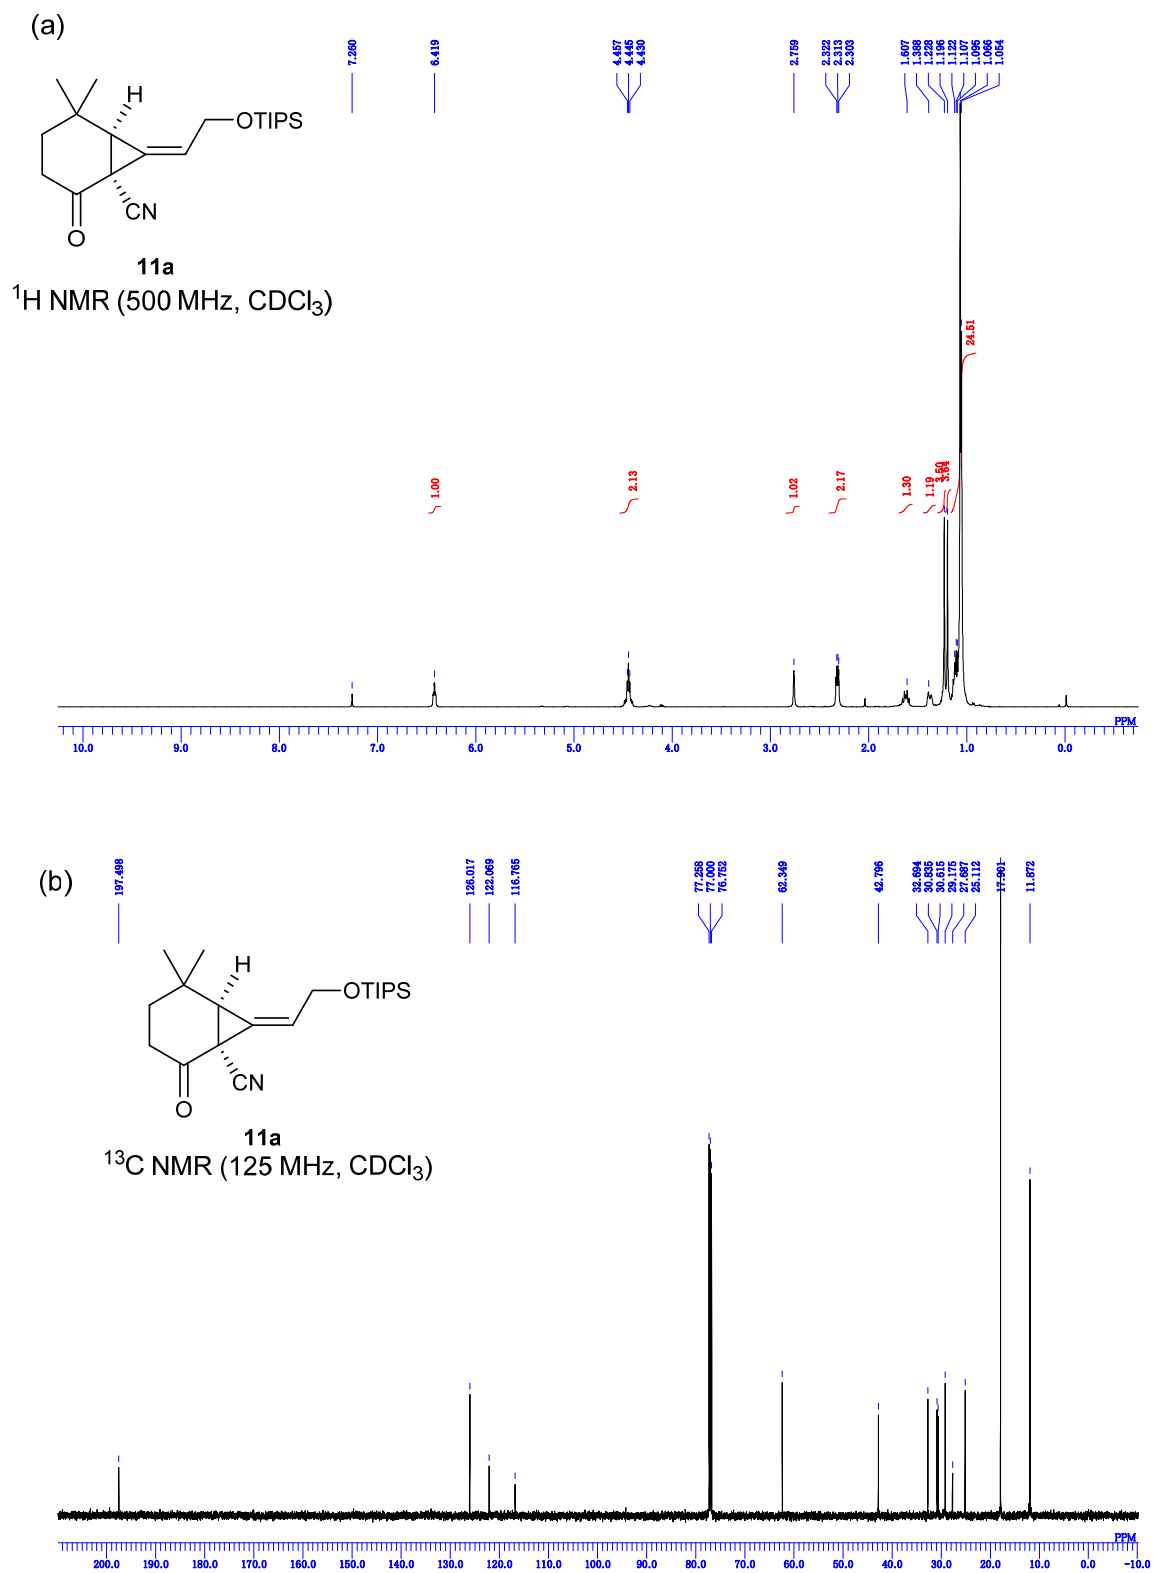

Supplementary Fig. 16.  $^1\text{H}$  (a) and  $^{13}\text{C}$  NMR (b) spectra of **11a**



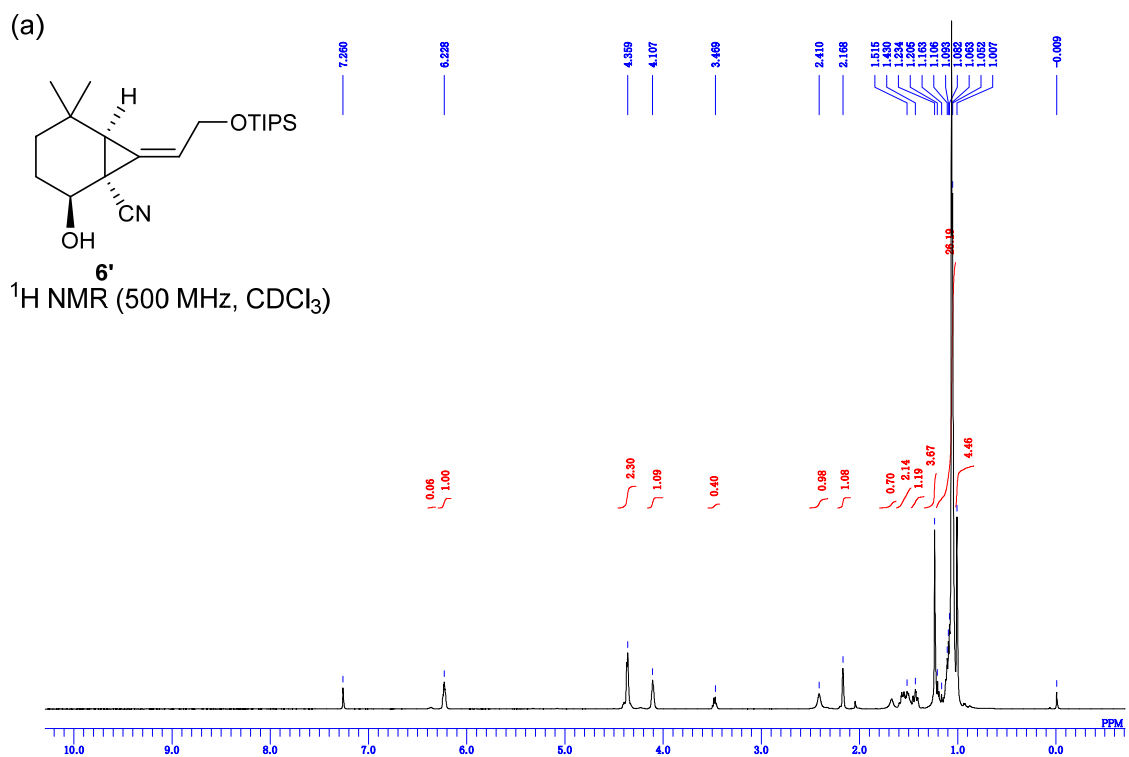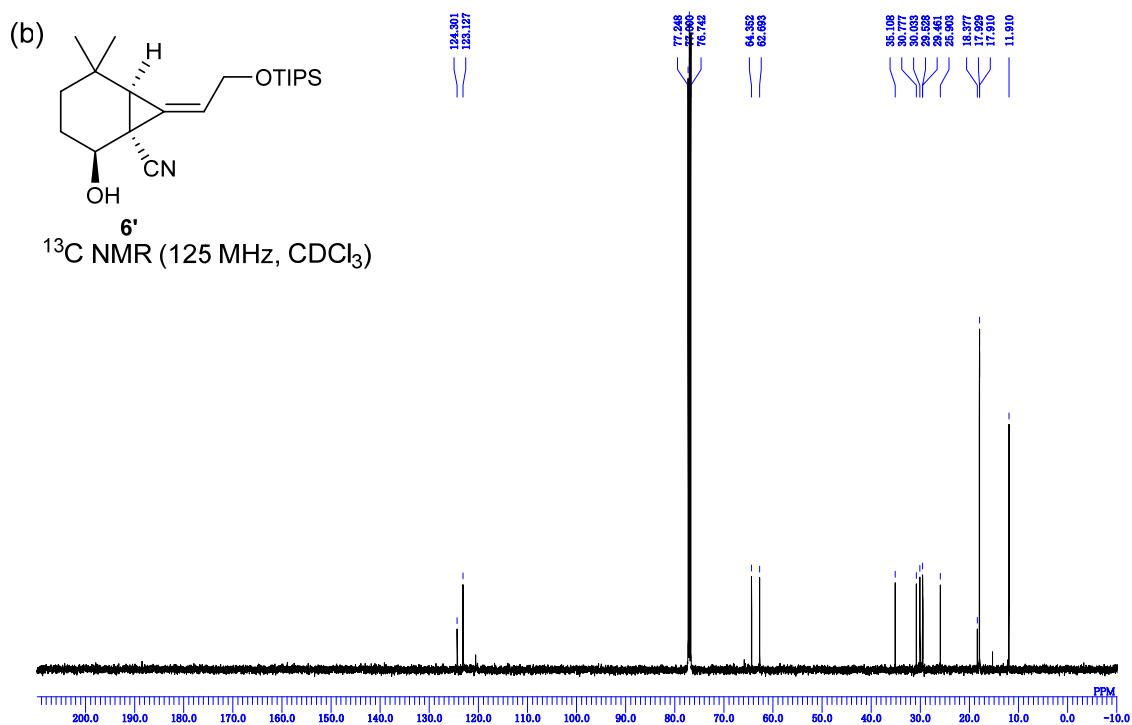

Supplementary Fig. 17.  $^1\text{H}$  (a) and  $^{13}\text{C}$  NMR (b) spectra of **6'**

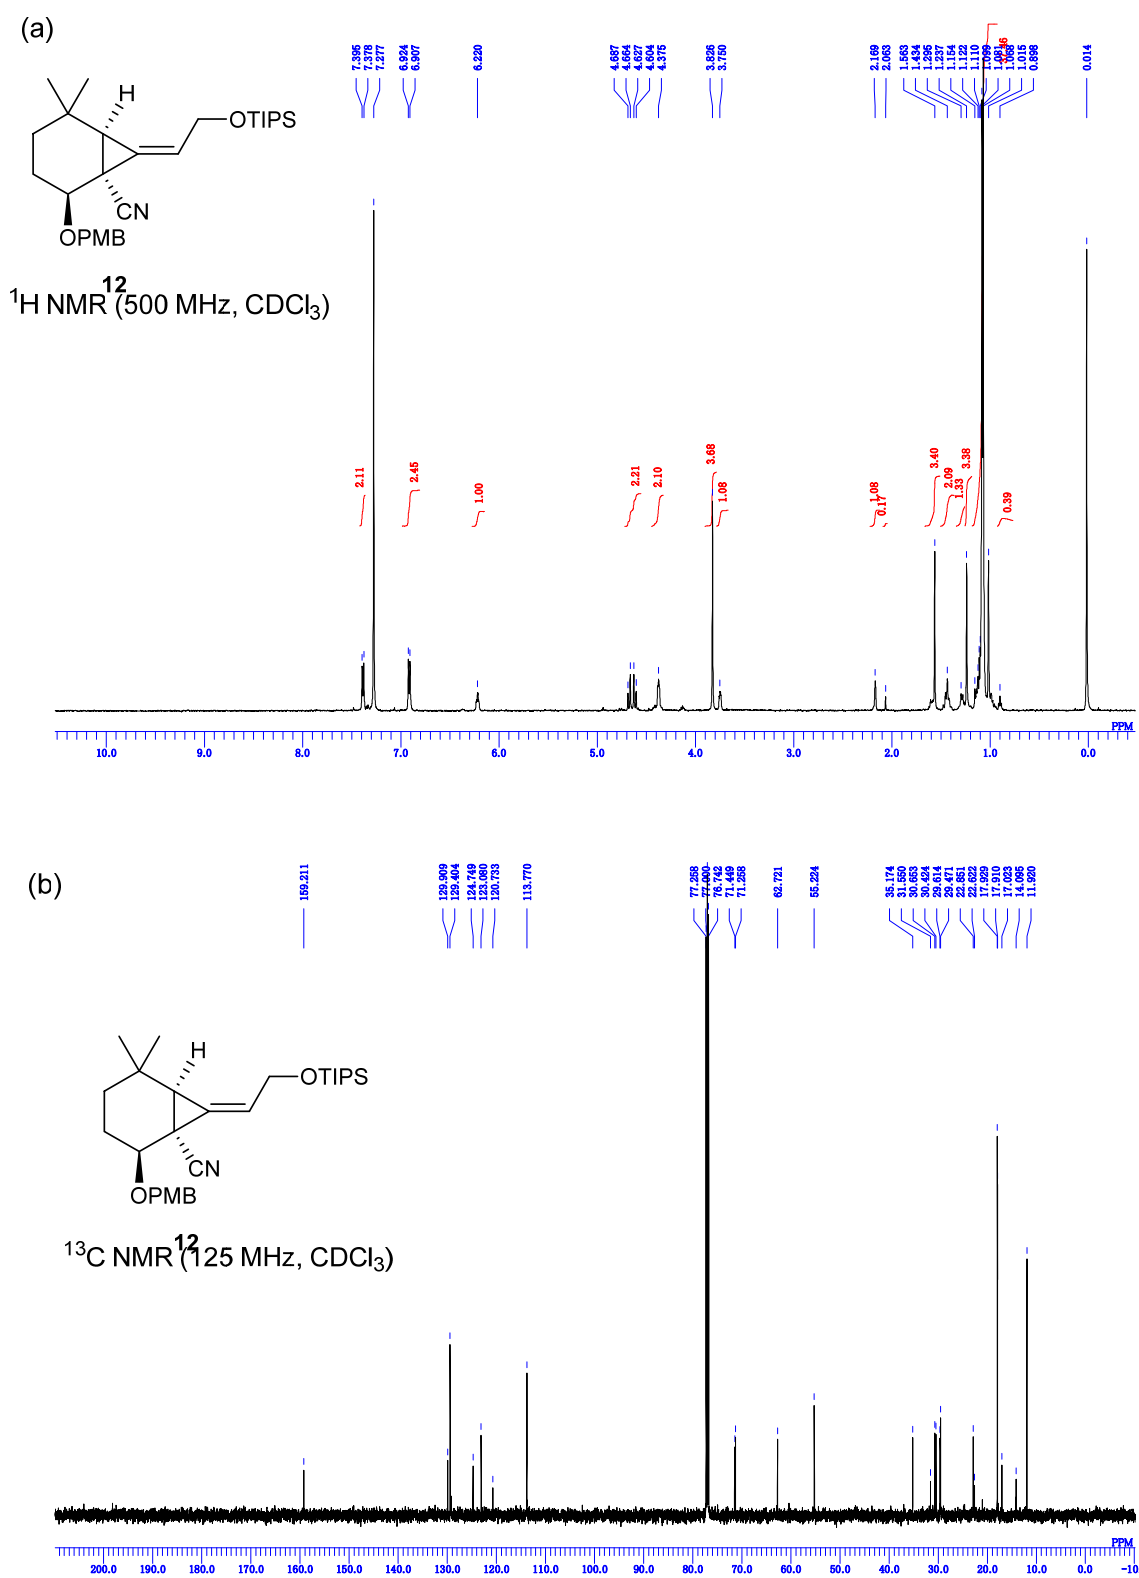

Supplementary Fig. 18.  $^1\text{H}$  (a) and  $^{13}\text{C}$  NMR (b) spectra of **12**

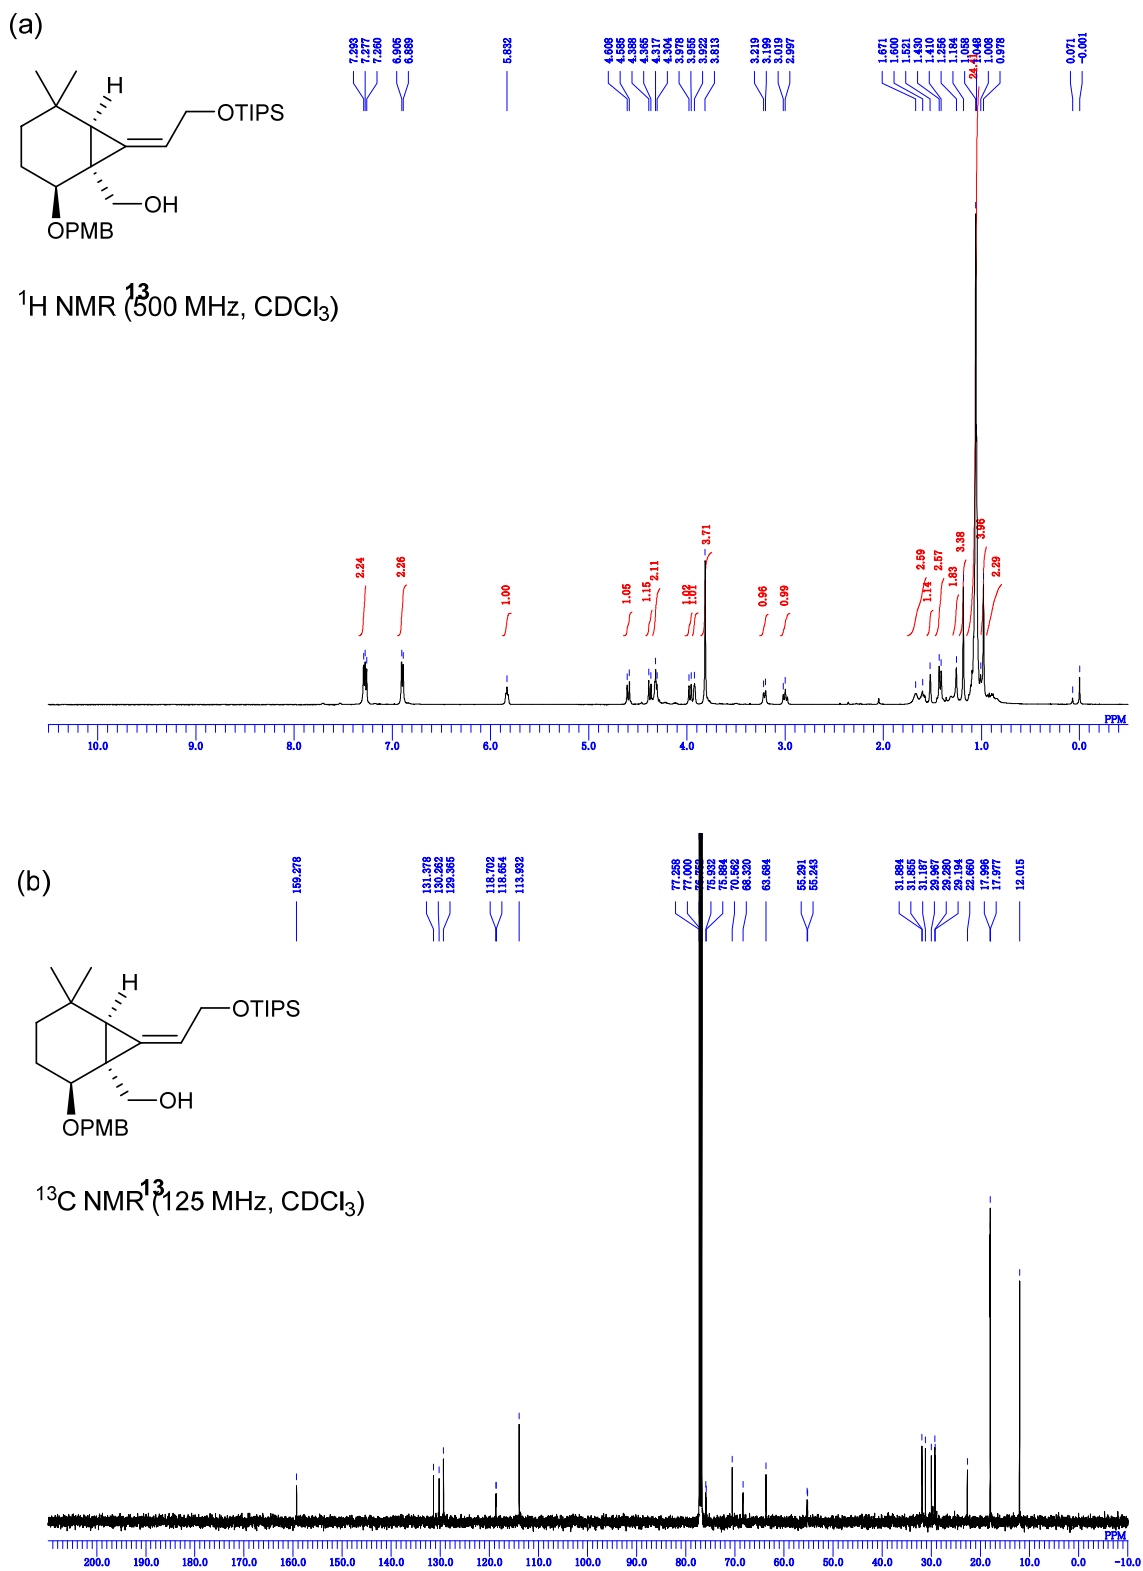

Supplementary Fig. 19.  $^1\text{H}$  (a) and  $^{13}\text{C}$  NMR (b) spectra of 13

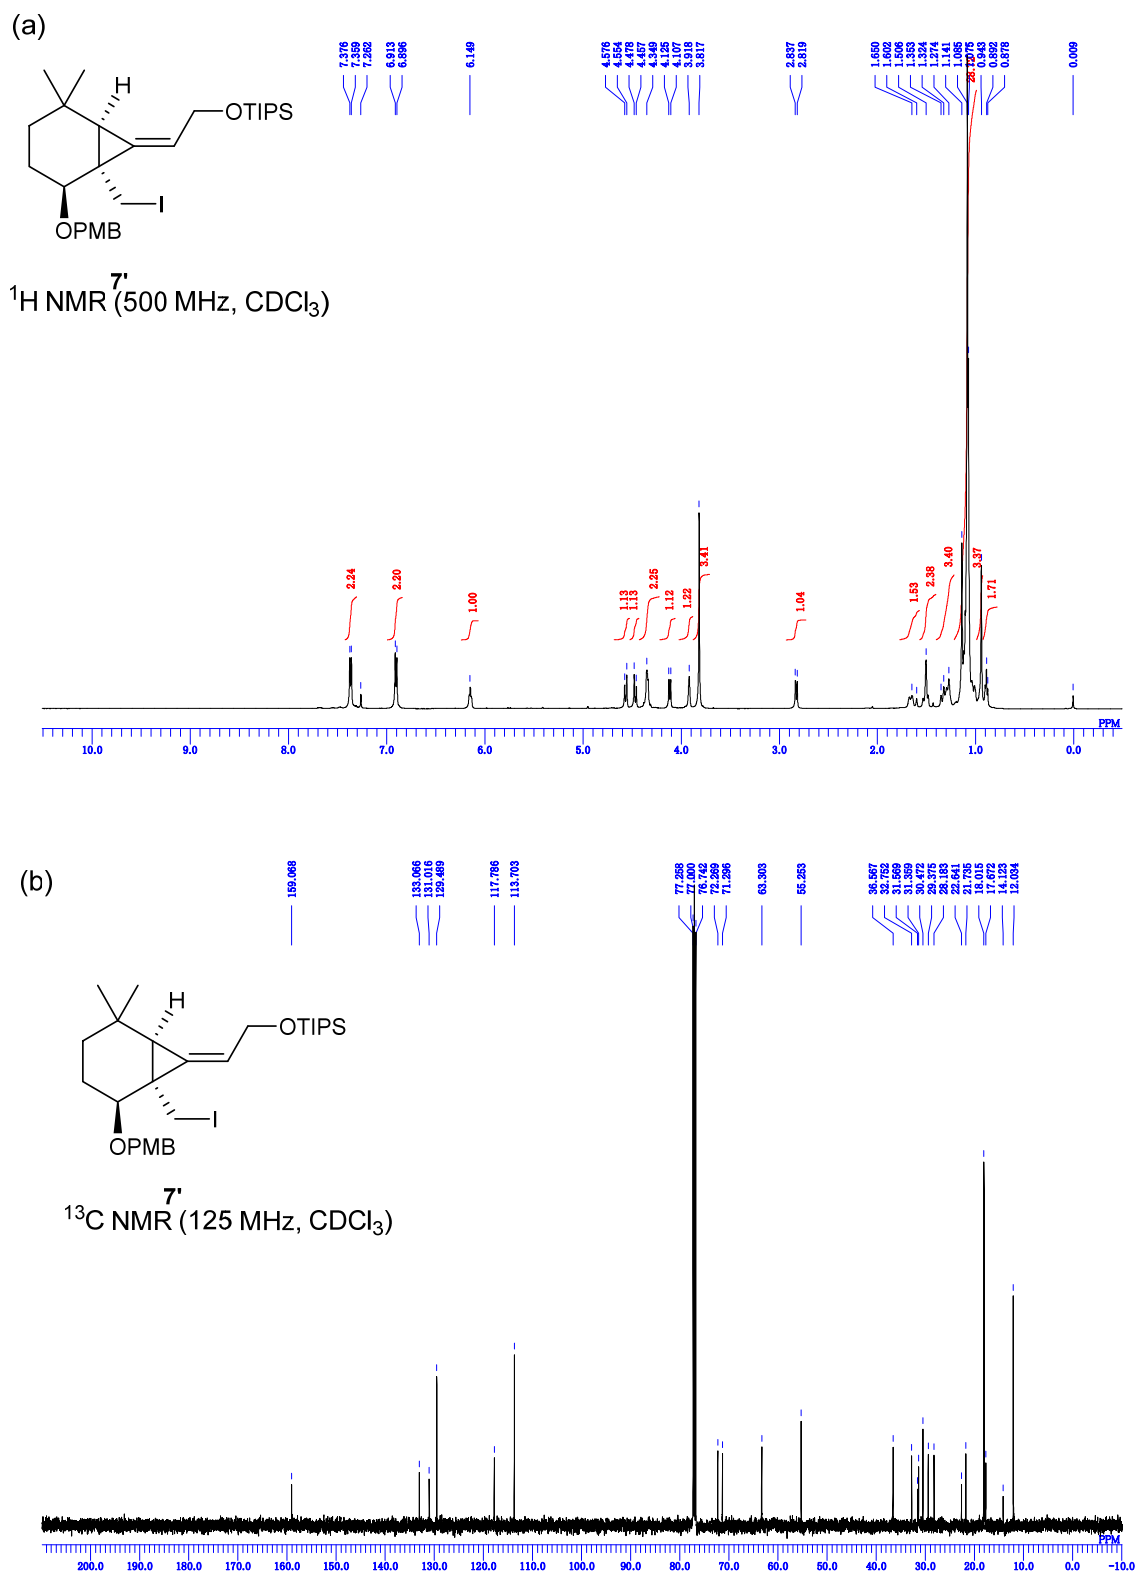

Supplementary Fig. 20.  $^1\text{H}$  (a) and  $^{13}\text{C}$  NMR (b) spectra of **7'**

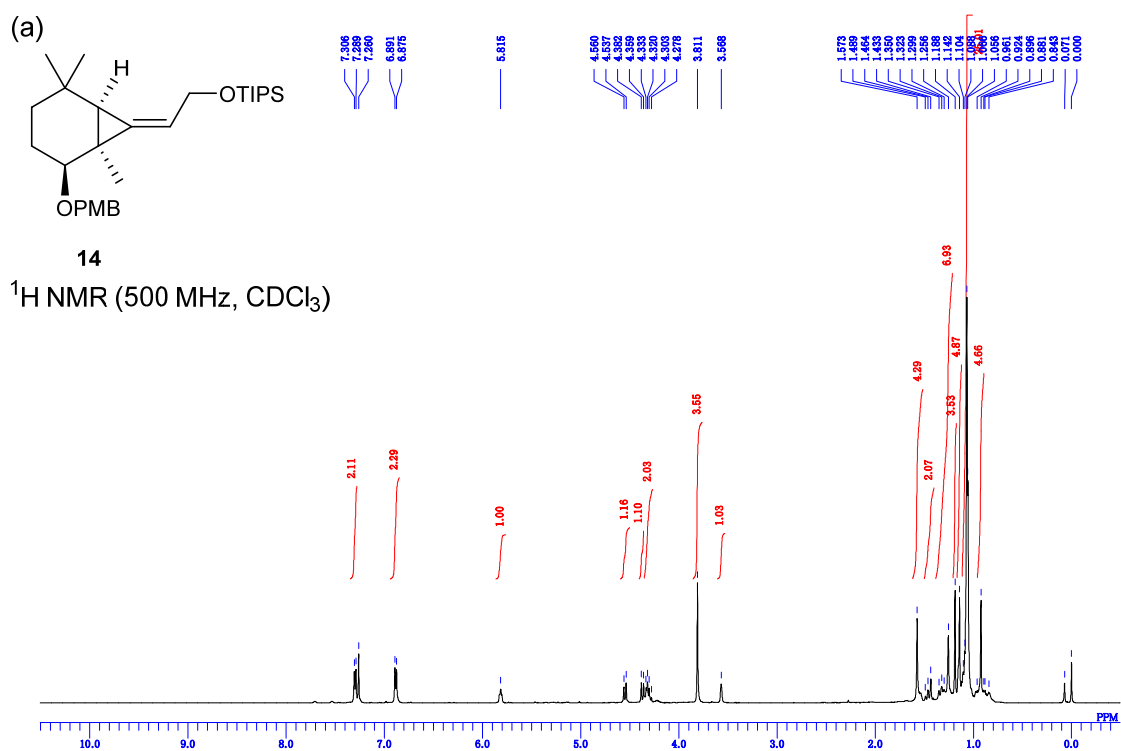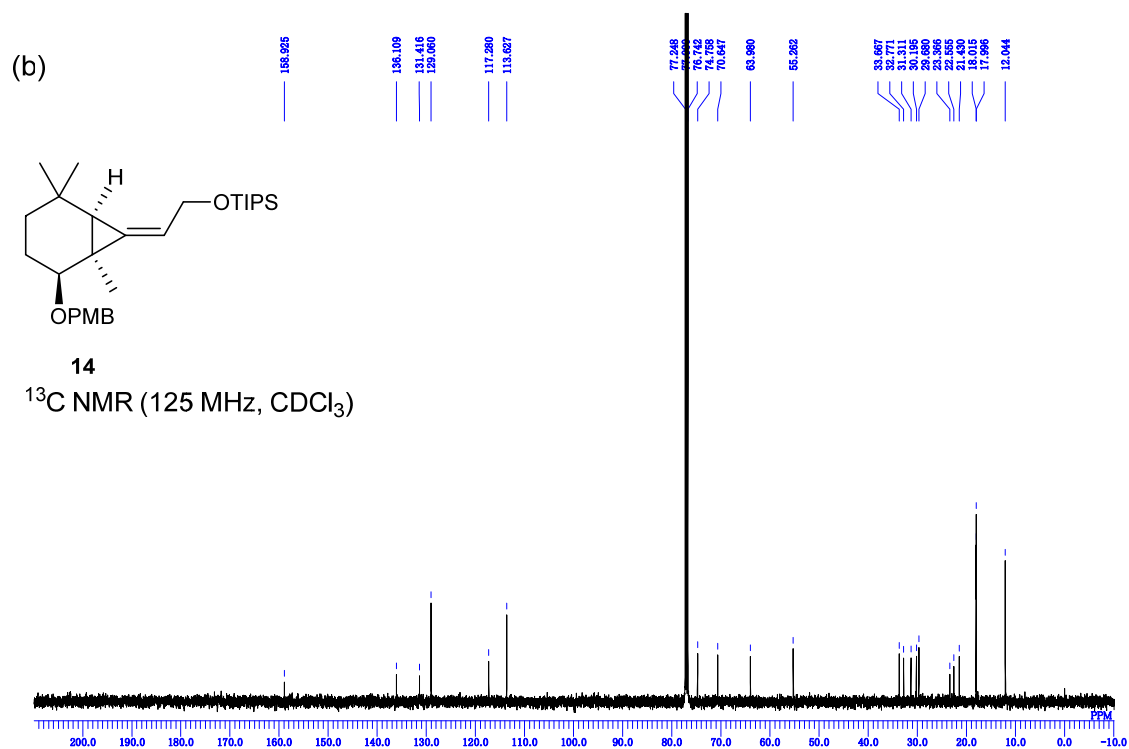

Supplementary Fig. 21.  $^1\text{H}$  (a) and  $^{13}\text{C}$  NMR (b) spectra of **14**'

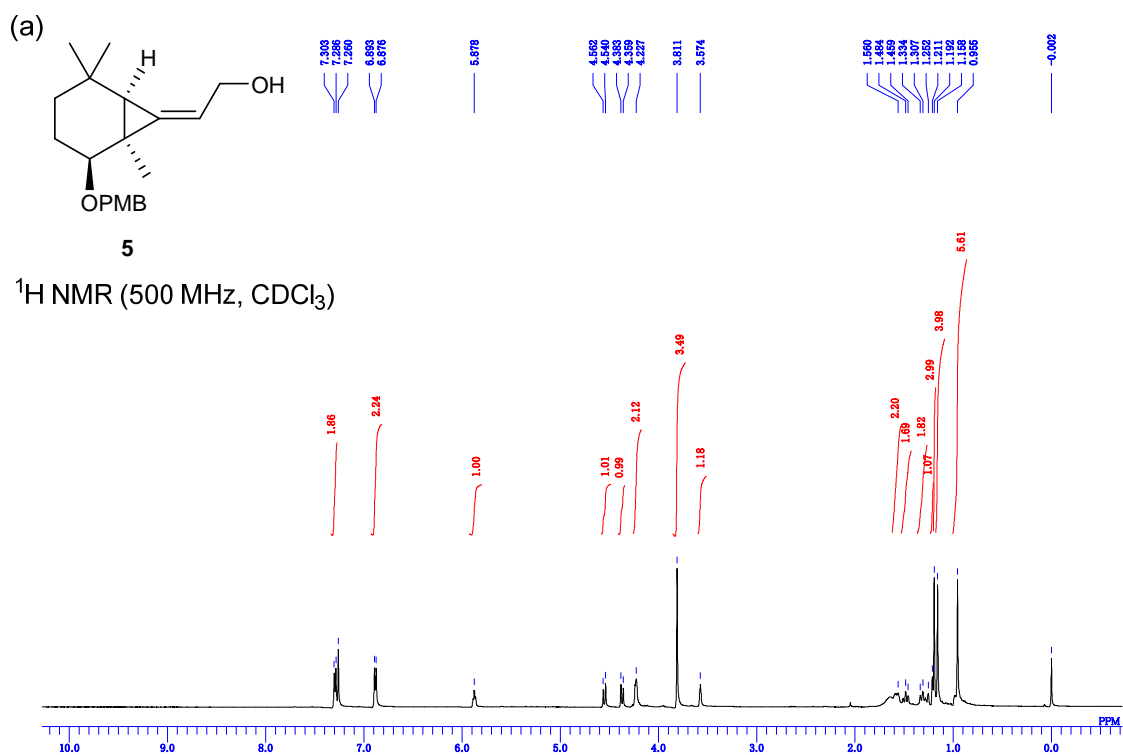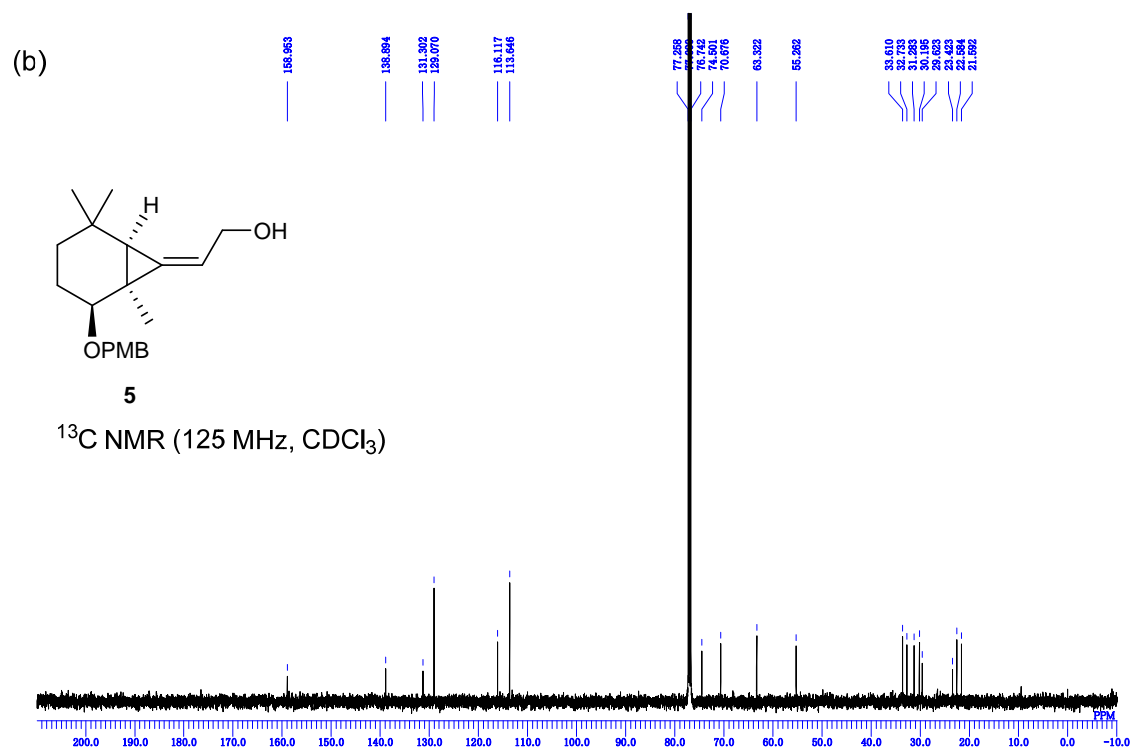

Supplementary Fig. 22. <sup>1</sup>H (a) and <sup>13</sup>C NMR (b) spectra of **5**

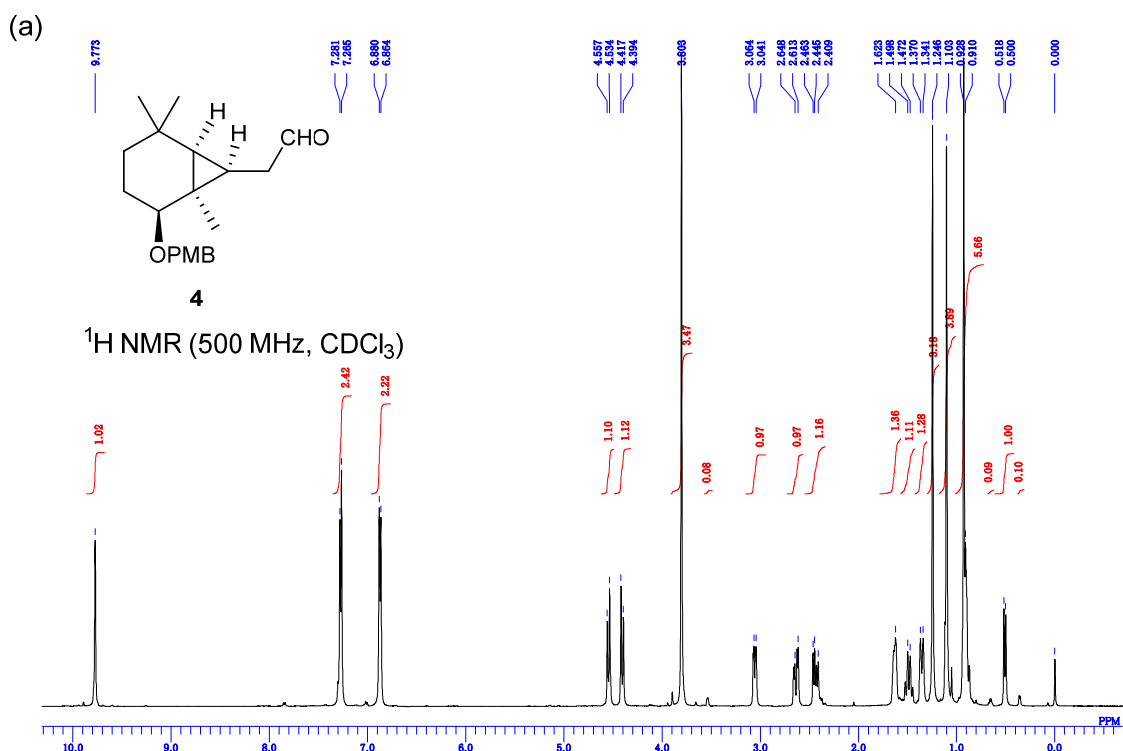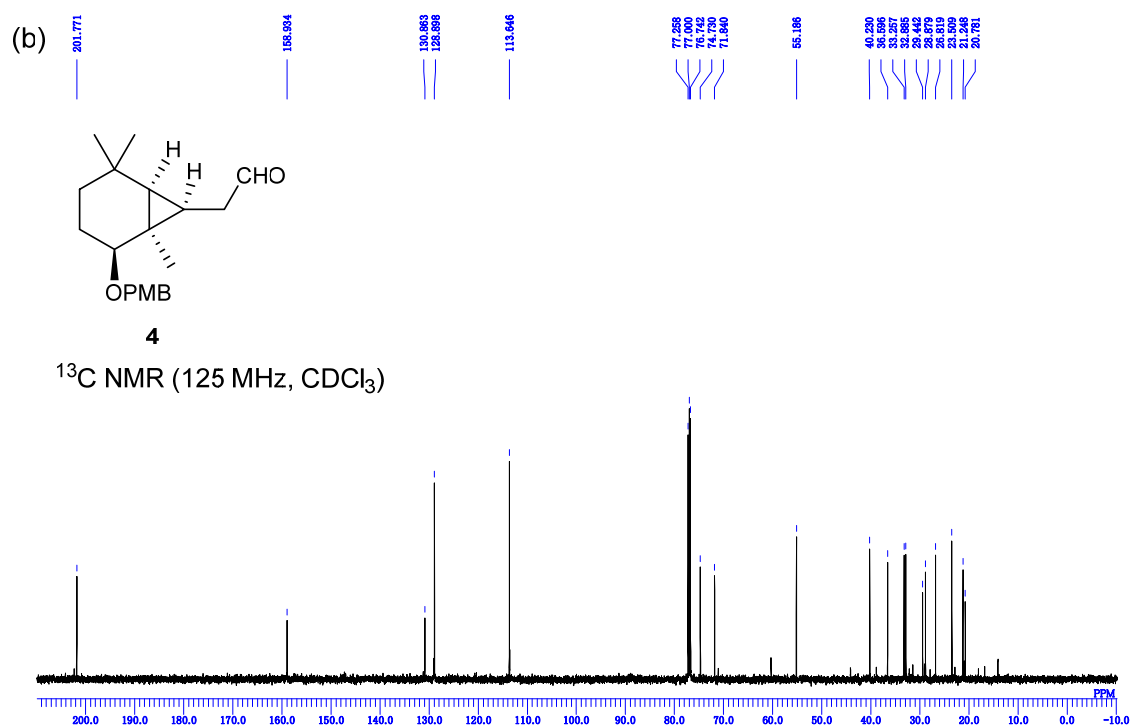

Supplementary Fig. 23.  $^1\text{H}$  (a) and  $^{13}\text{C}$  NMR (b) spectra of **4**

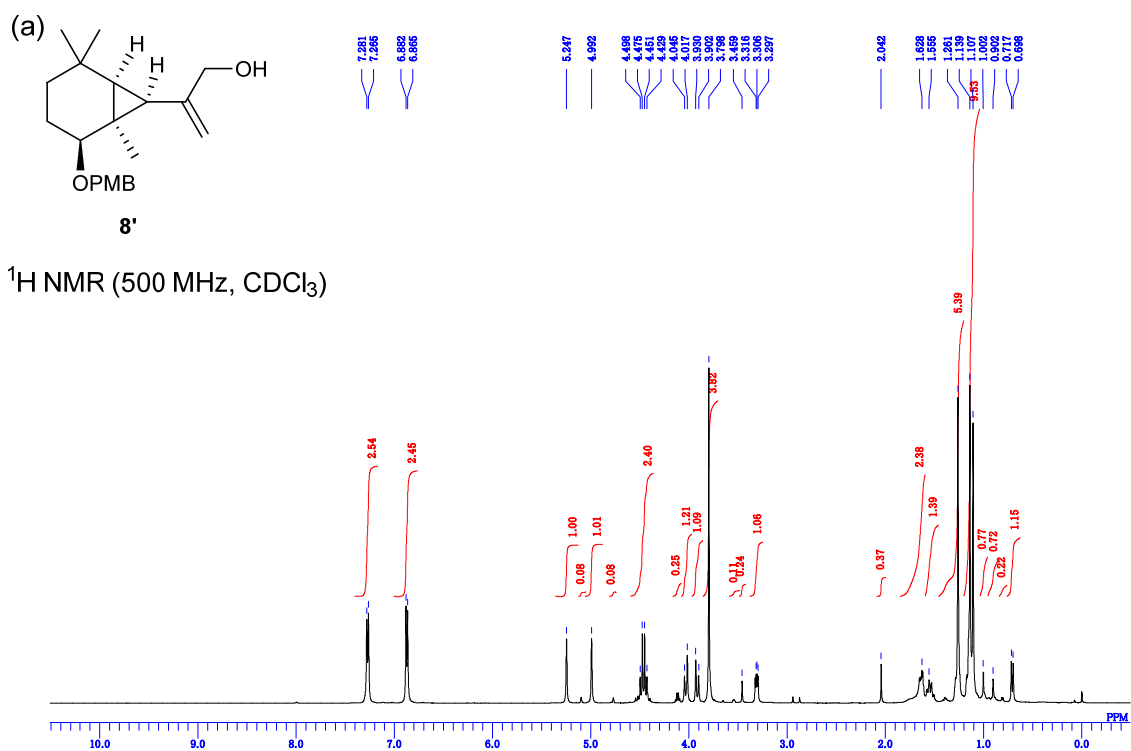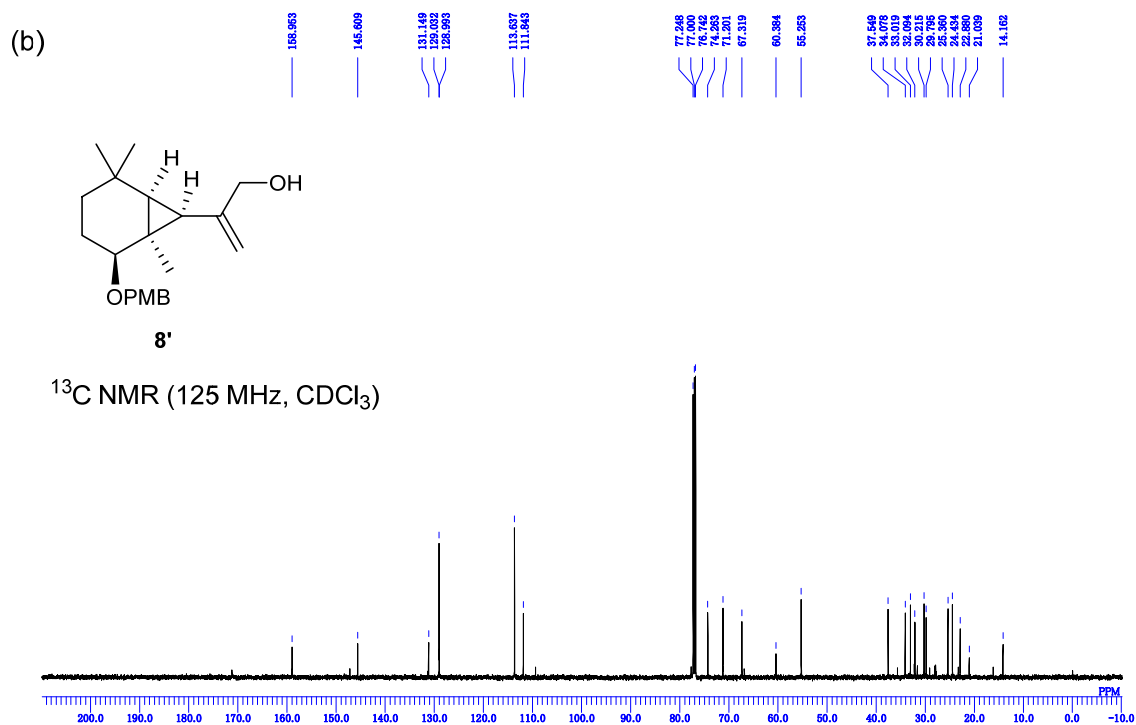

Supplementary Fig. 24.  $^1\text{H}$  (a) and  $^{13}\text{C}$  NMR (b) spectra of **8'**



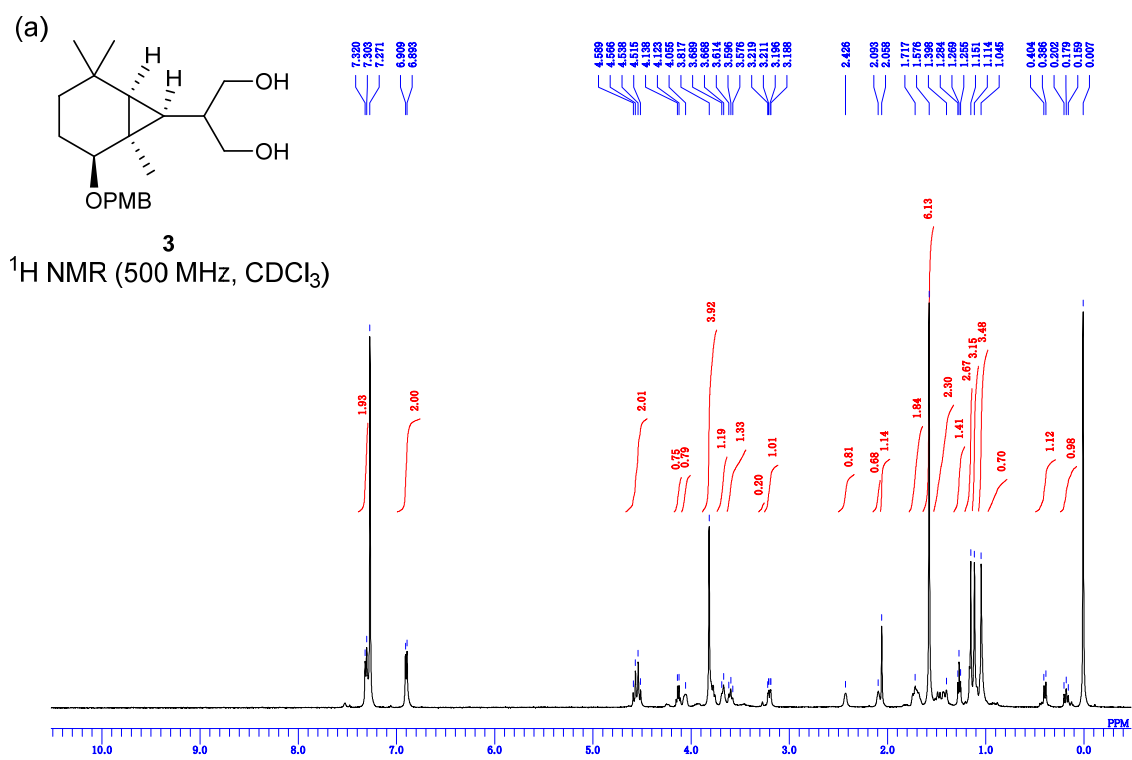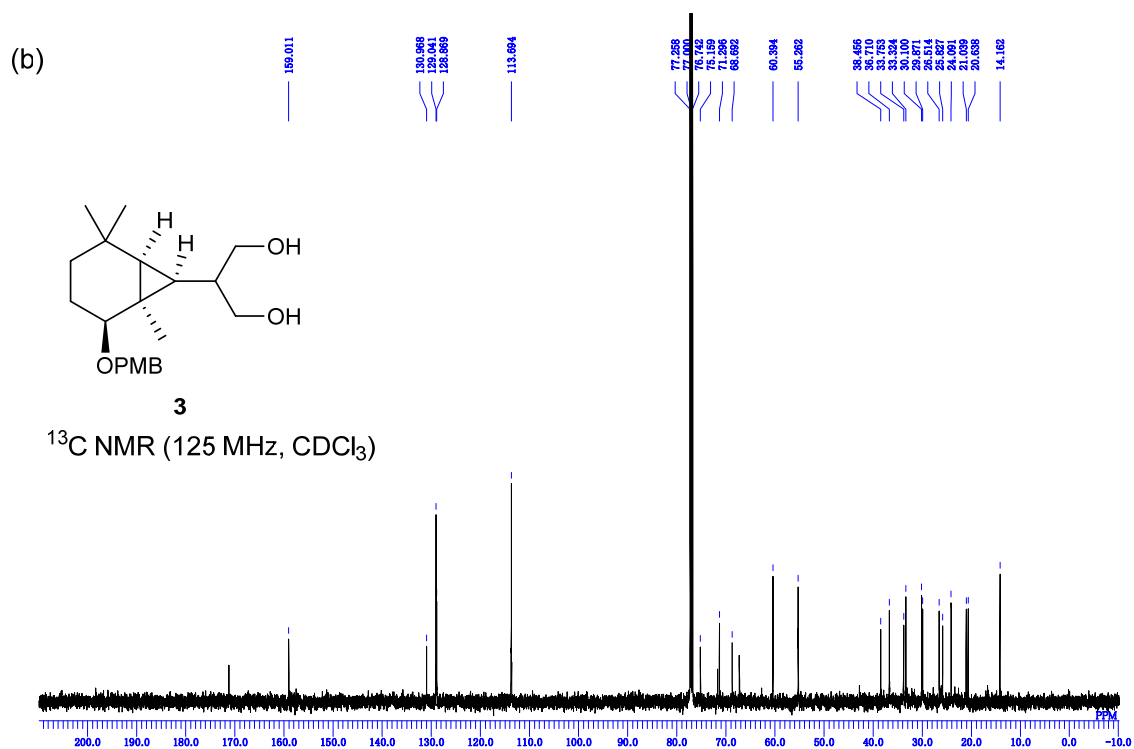

Supplementary Fig. 25.  $^1\text{H}$  (a) and  $^{13}\text{C}$  NMR (b) spectra of **3**

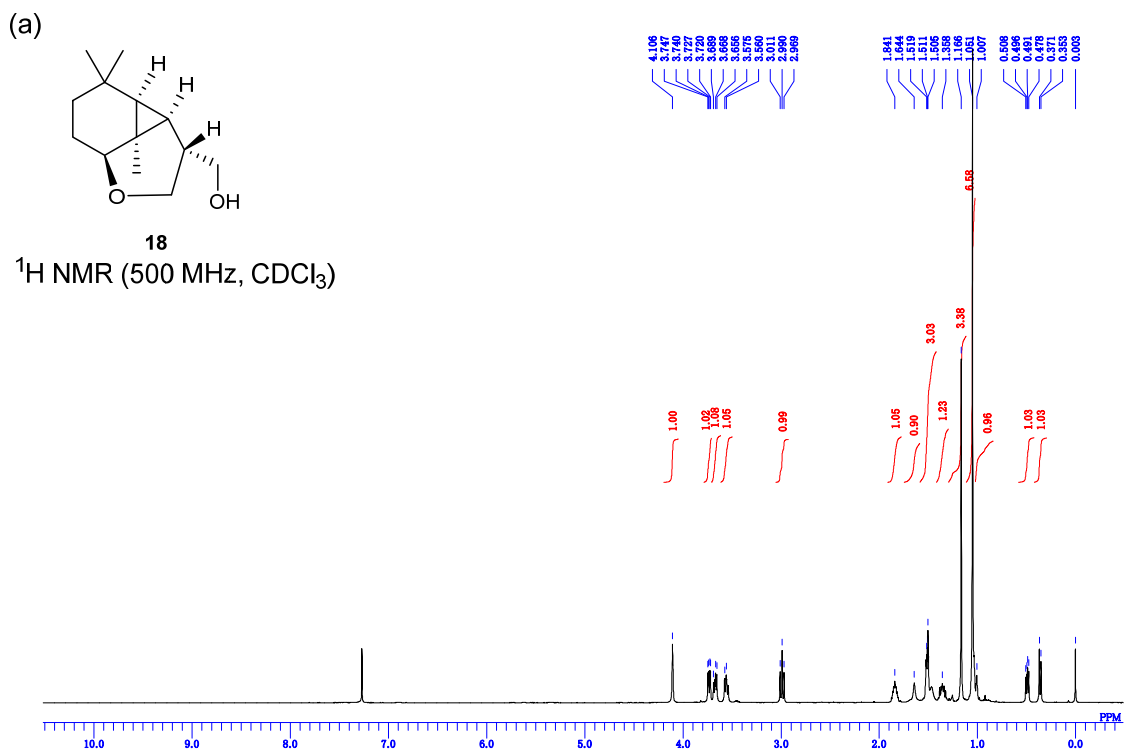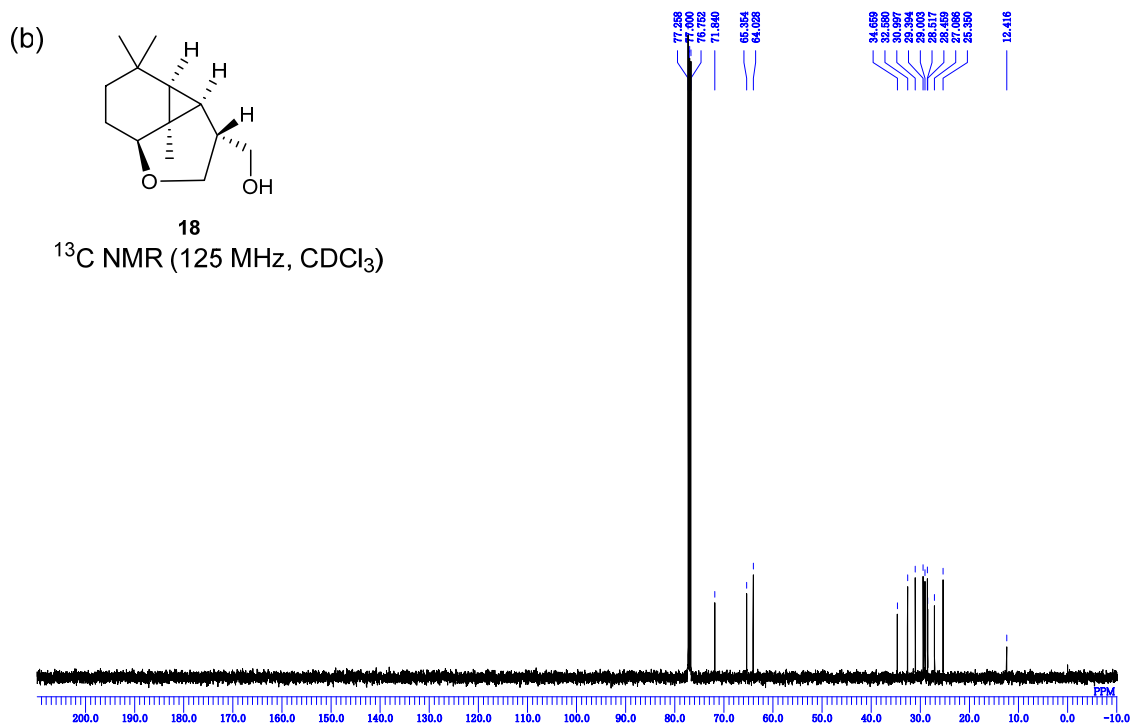

Supplementary Fig. 26.  $^1\text{H}$  (a) and  $^{13}\text{C}$  NMR (b) spectra of **18**

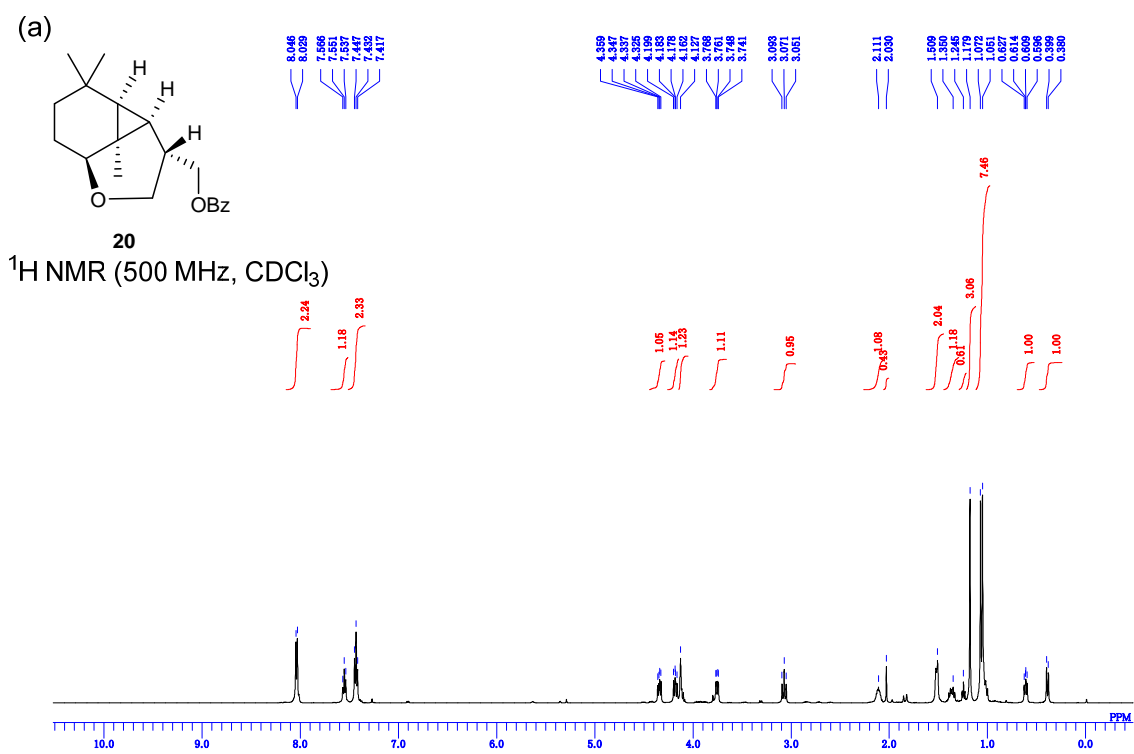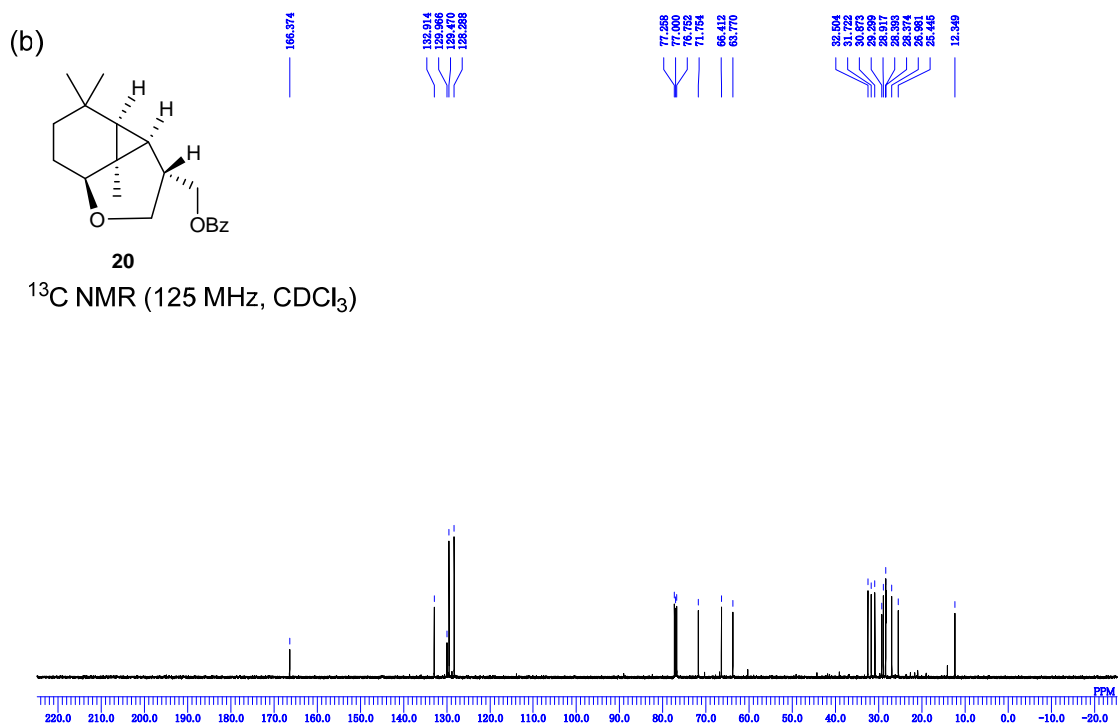

Supplementary Fig. 27.  $^1\text{H}$  (a) and  $^{13}\text{C}$  NMR (b) spectra of **20**

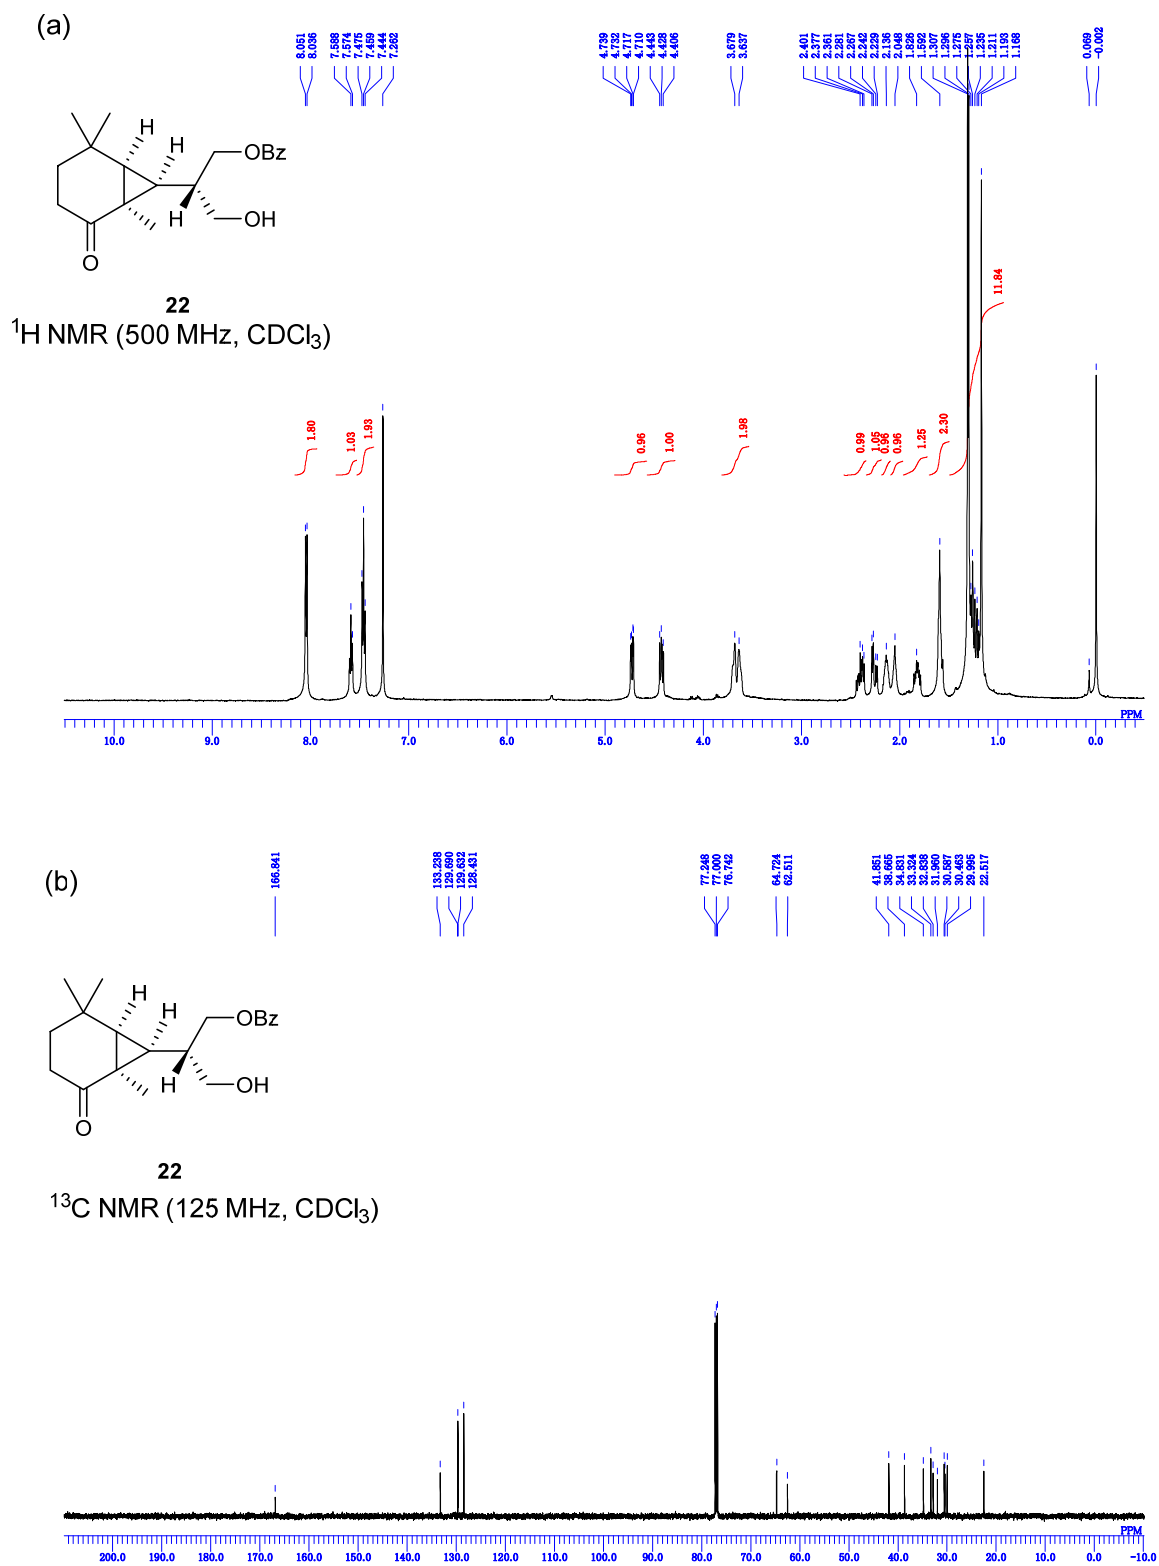

Supplementary Fig. 28.  $^1\text{H}$  (a) and  $^{13}\text{C}$  NMR (b) spectra of **22**

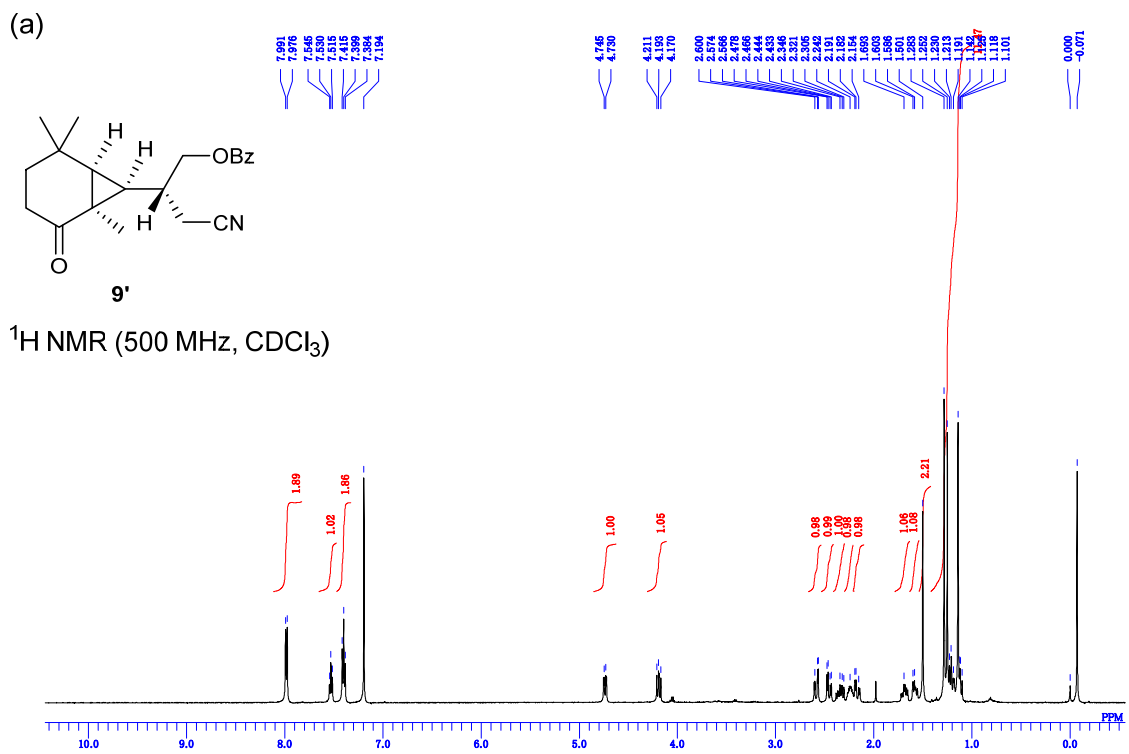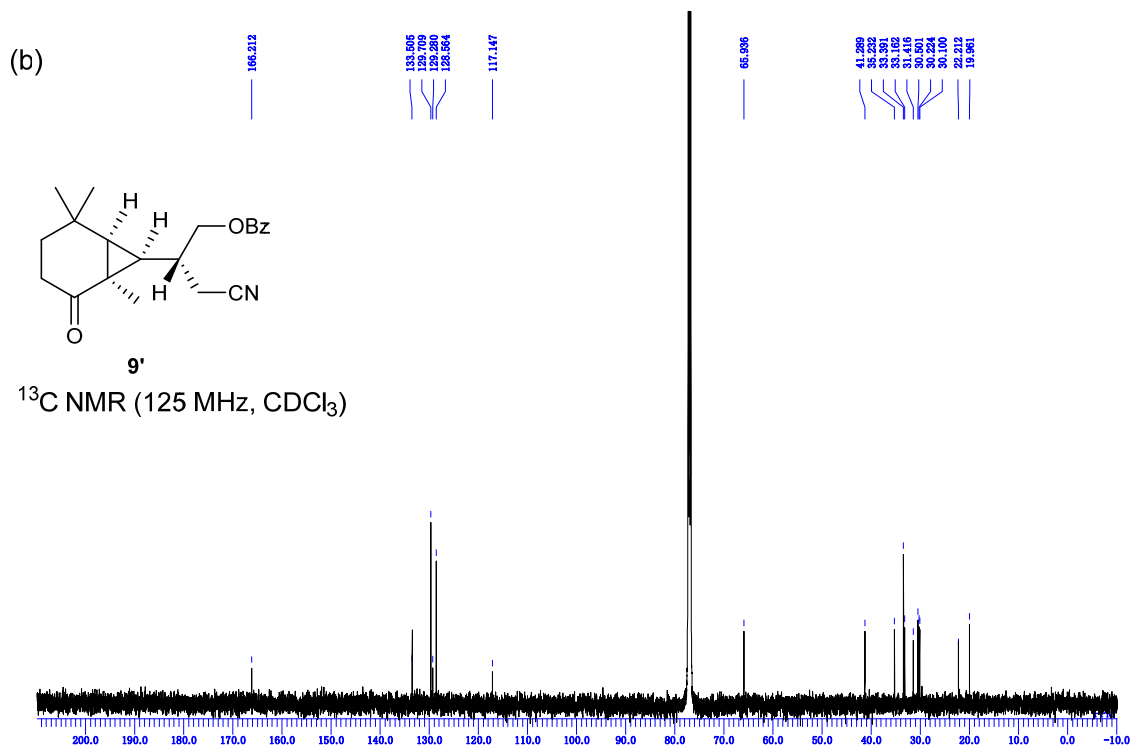

Supplementary Fig. 29.  $^1\text{H}$  (a) and  $^{13}\text{C}$  NMR (b) spectra of **9'**

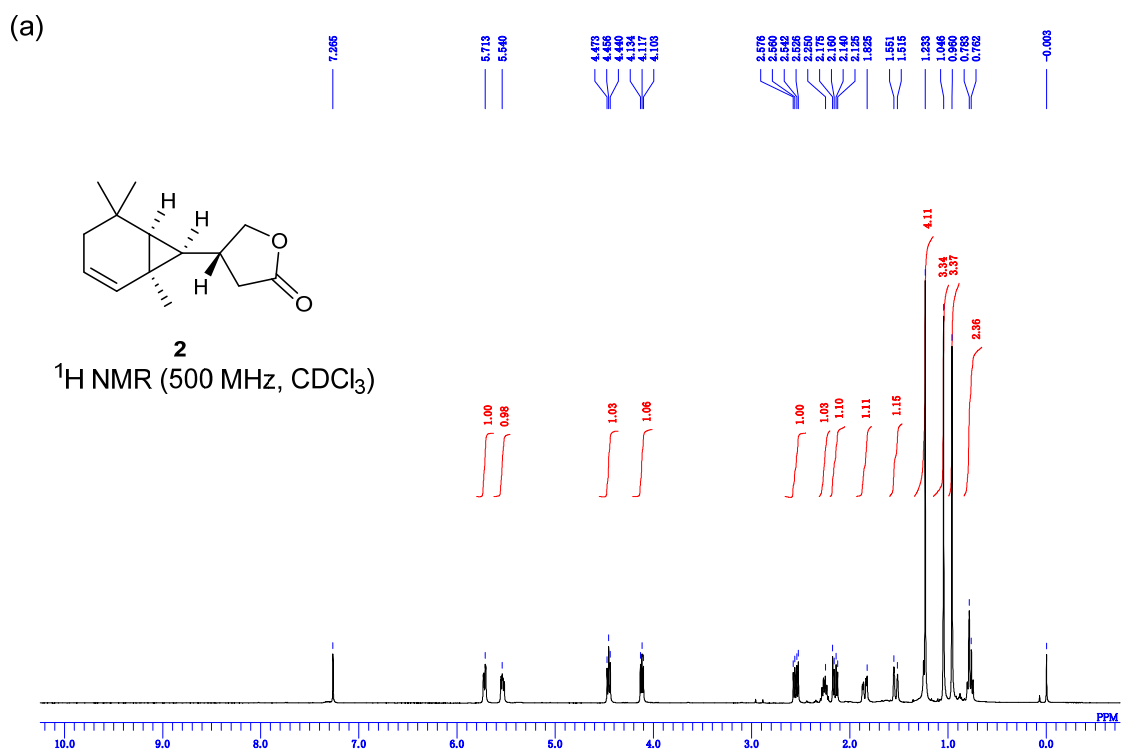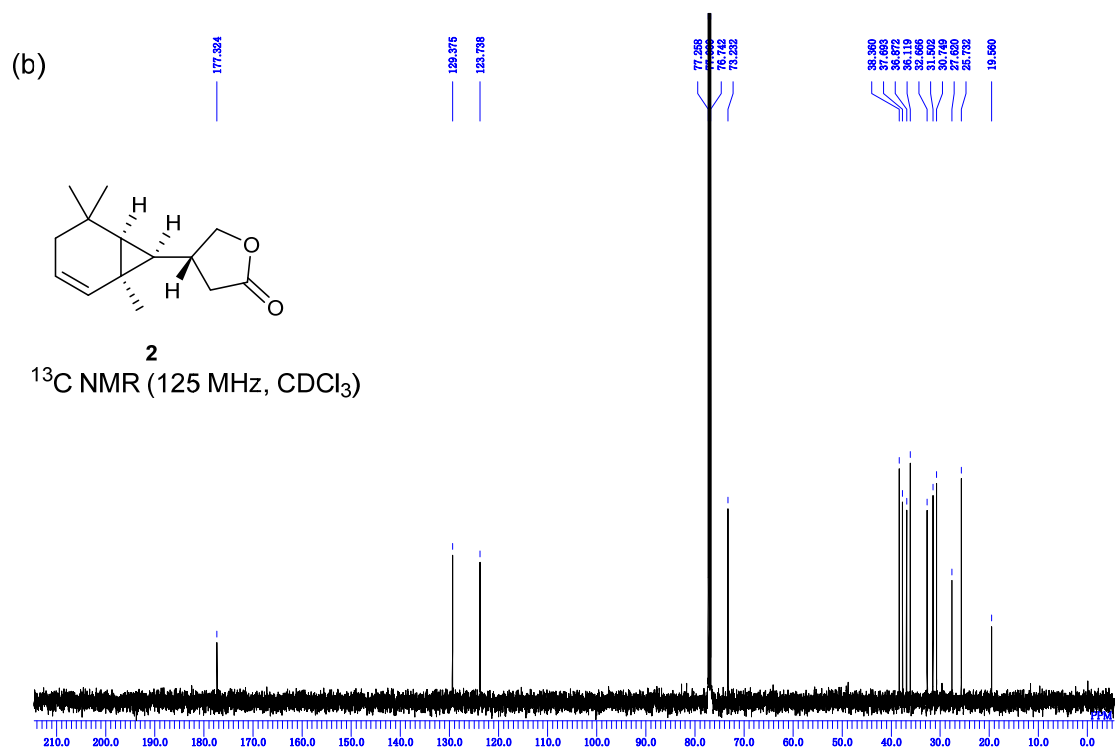

Supplementary Fig. 30.  $^1\text{H}$  (a) and  $^{13}\text{C}$  NMR (b) spectra of **2**

(a)

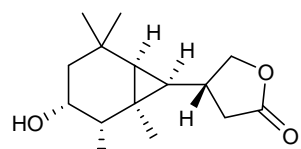

10'

$^1\text{H}$  NMR (500 MHz,  $\text{CDCl}_3$ )

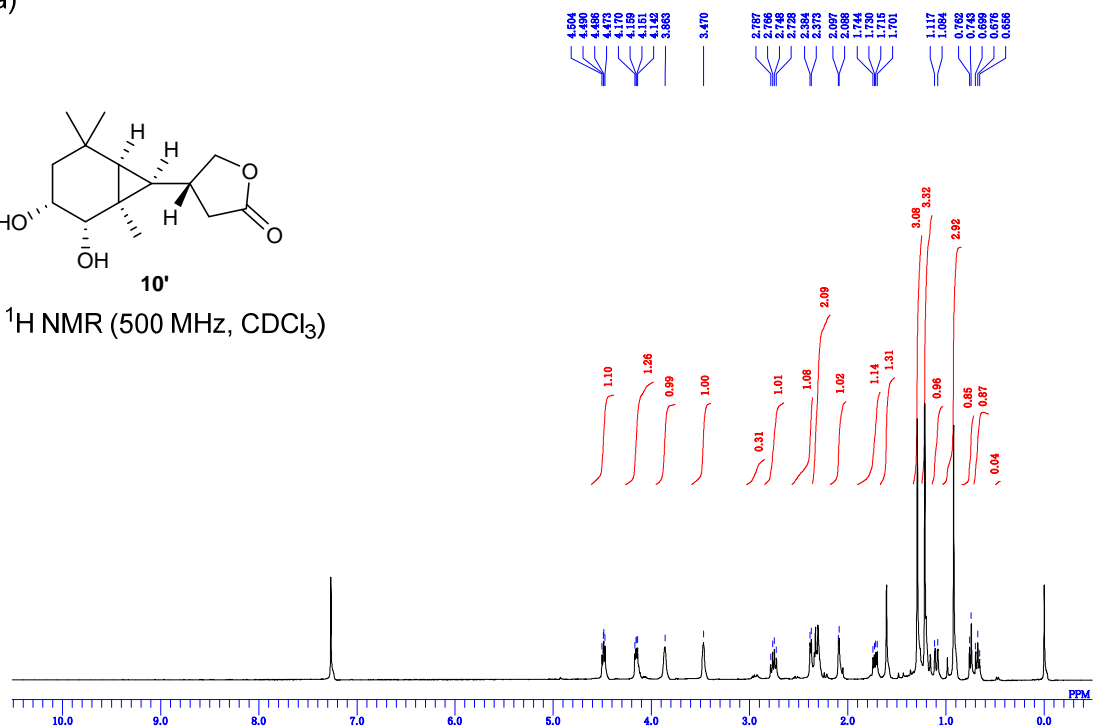

(b)

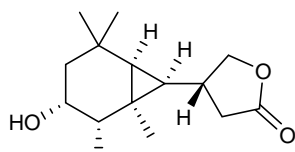

10'

$^{13}\text{C}$  NMR (125 MHz,  $\text{CDCl}_3$ )

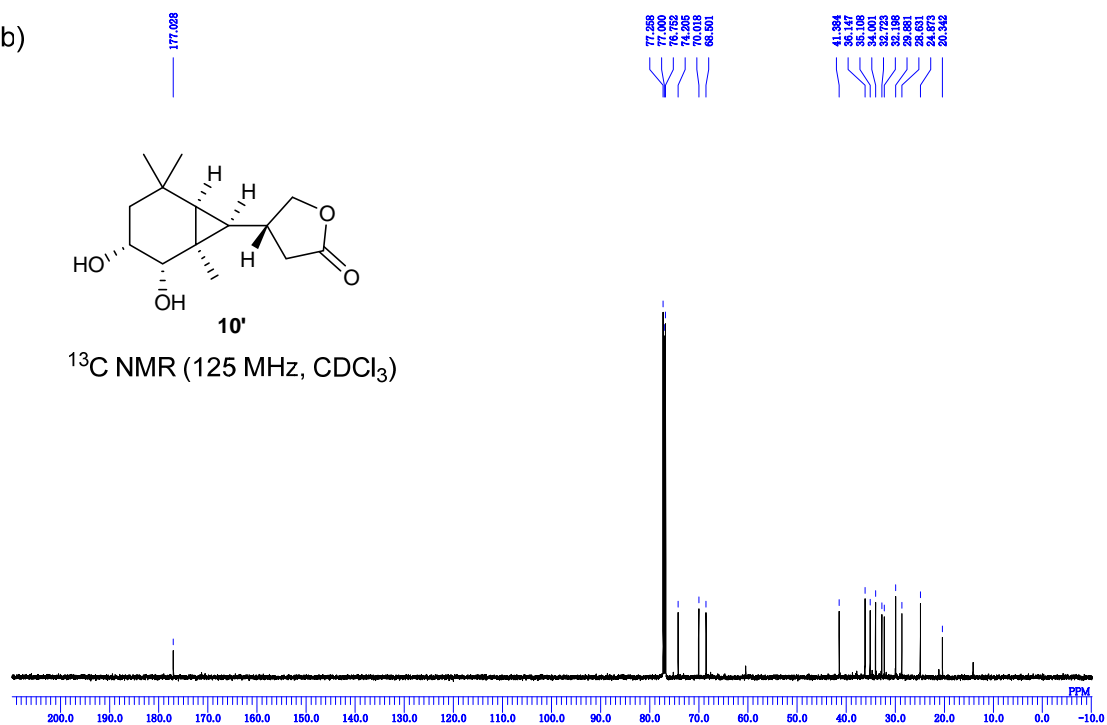

Supplementary Fig. 31.  $^1\text{H}$  (a) and  $^{13}\text{C}$  NMR (b) spectra of 10'

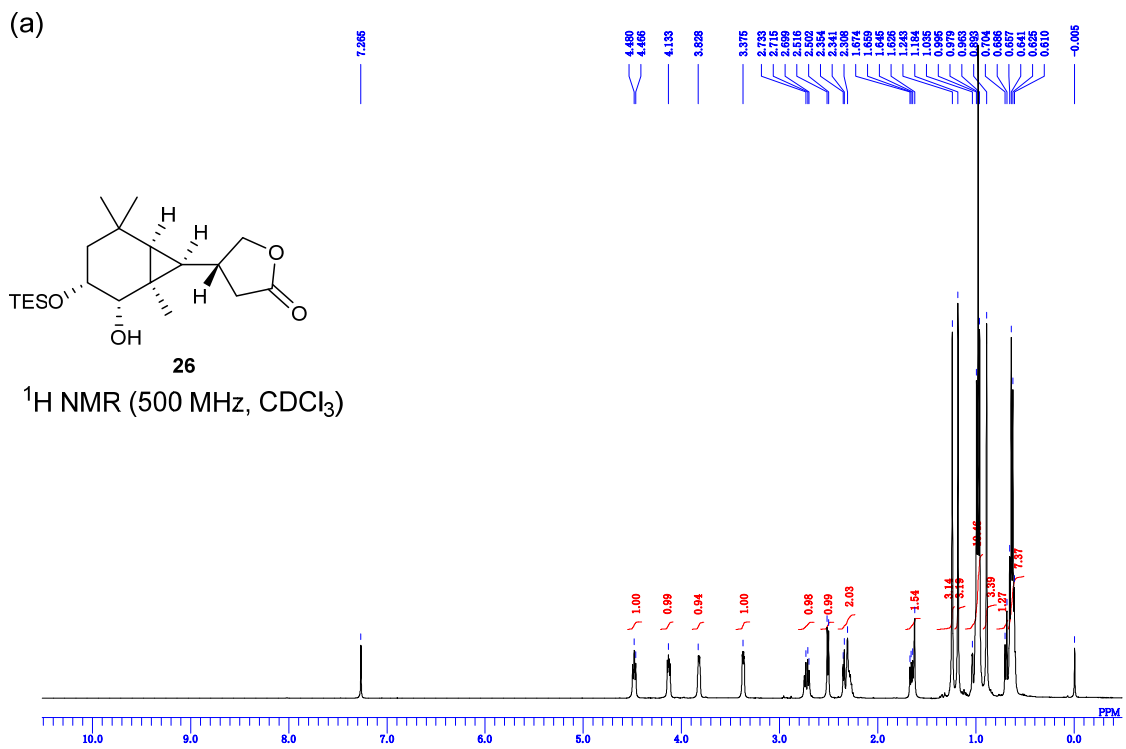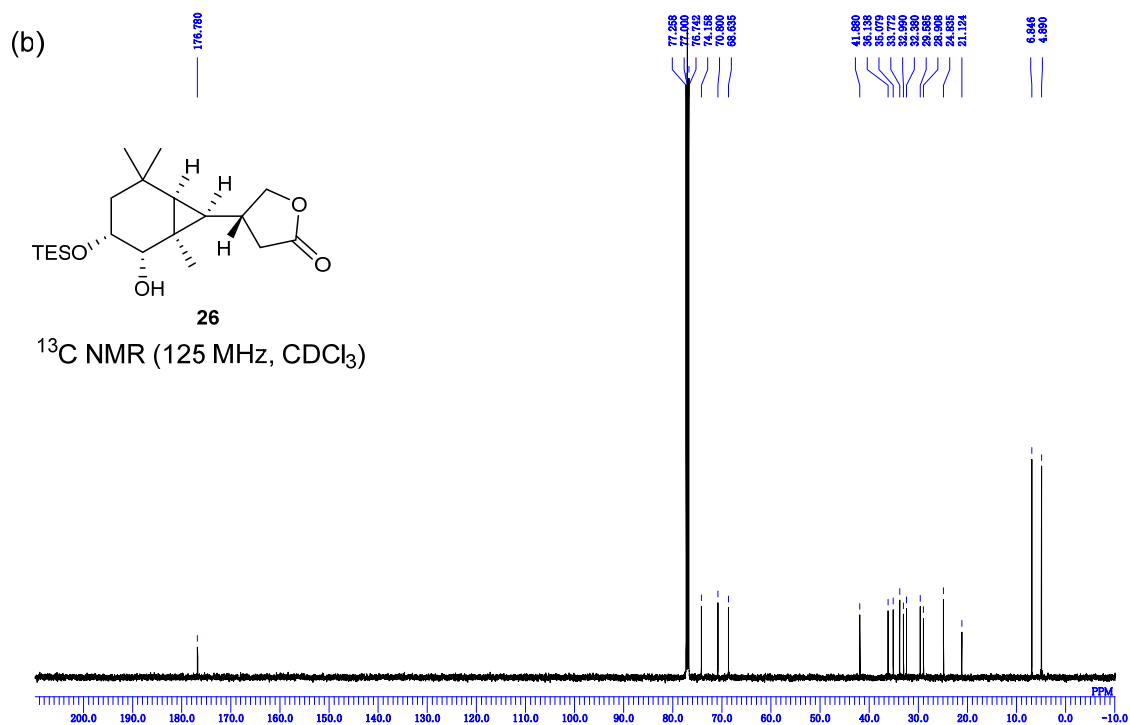

Supplementary Fig. 32.  $^1\text{H}$  (a) and  $^{13}\text{C}$  NMR (b) spectra of 26



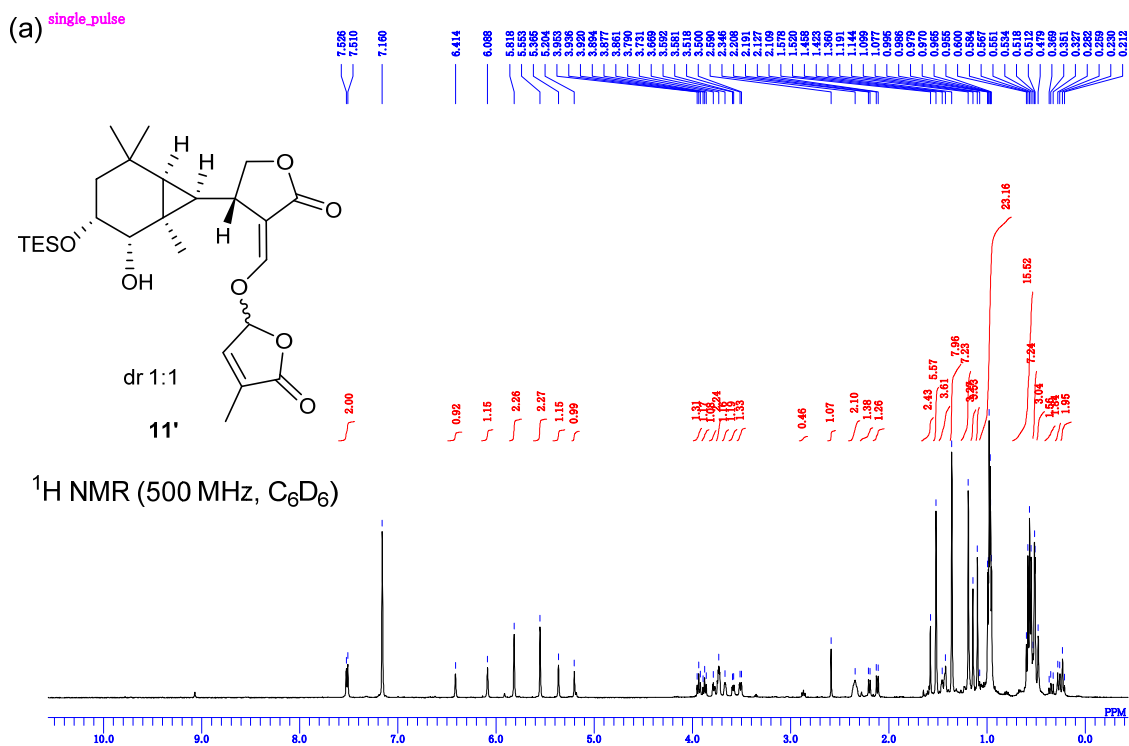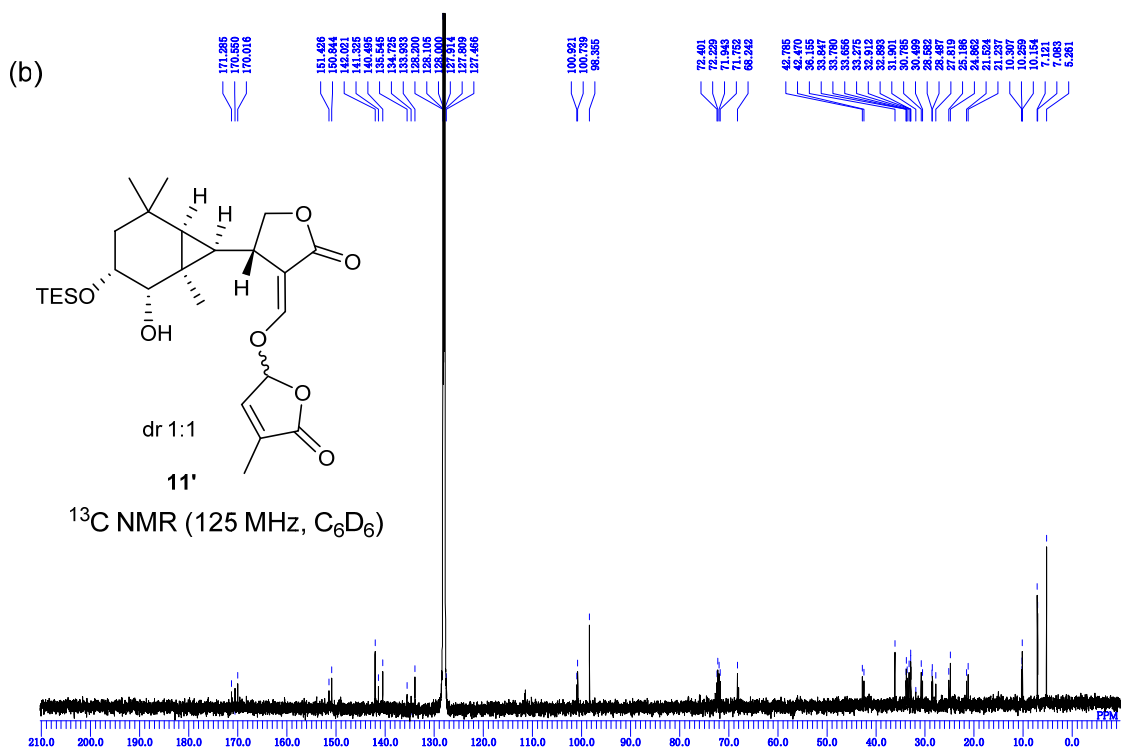

Supplementary Fig. 33.  $^1\text{H}$  (a) and  $^{13}\text{C}$  NMR (b) spectra of **11'**

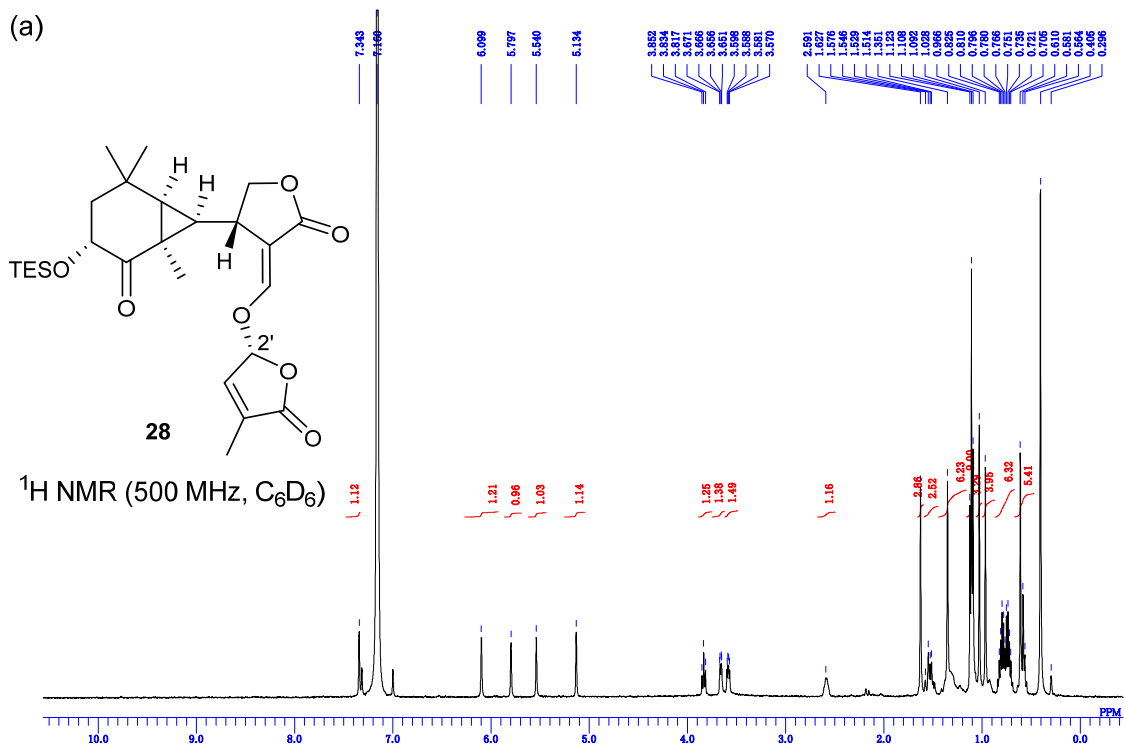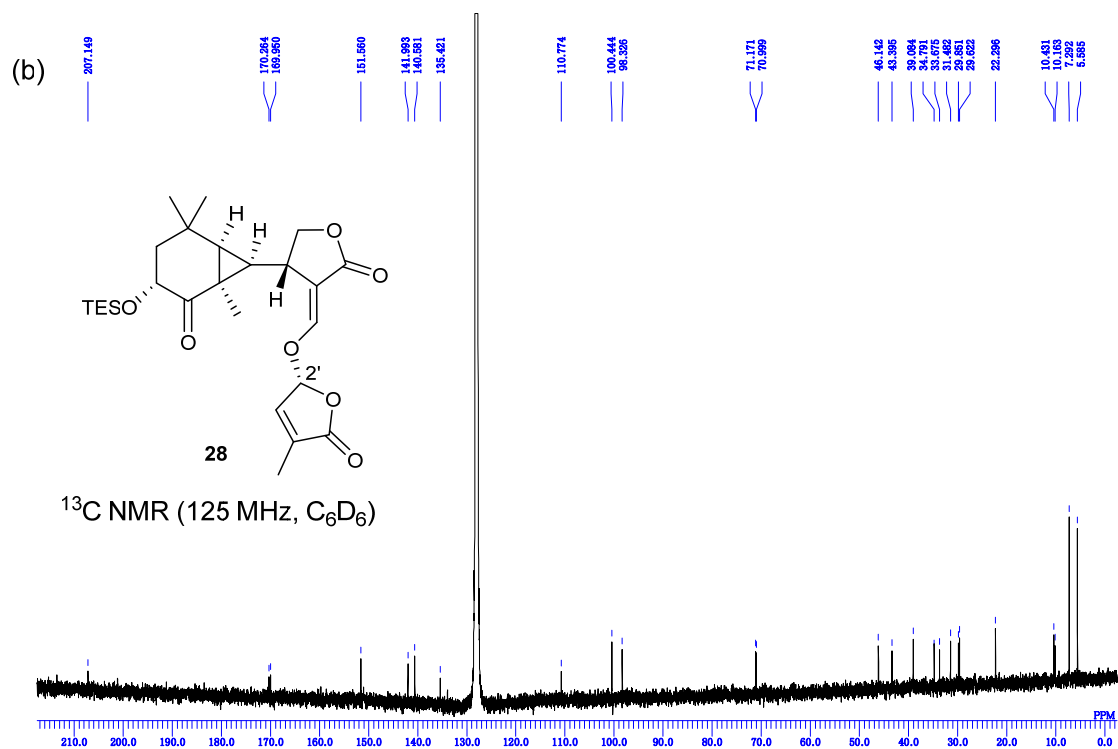

Supplementary Fig. 34.  $^1\text{H}$  (a) and  $^{13}\text{C}$  NMR (b) spectra of 28

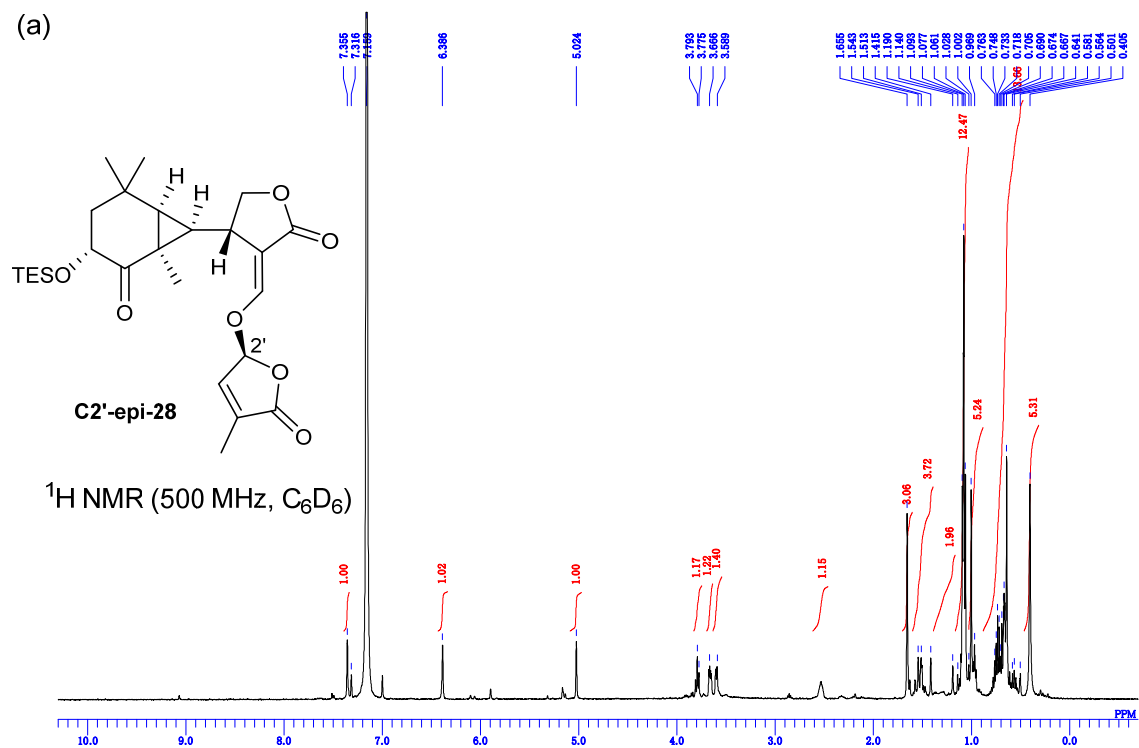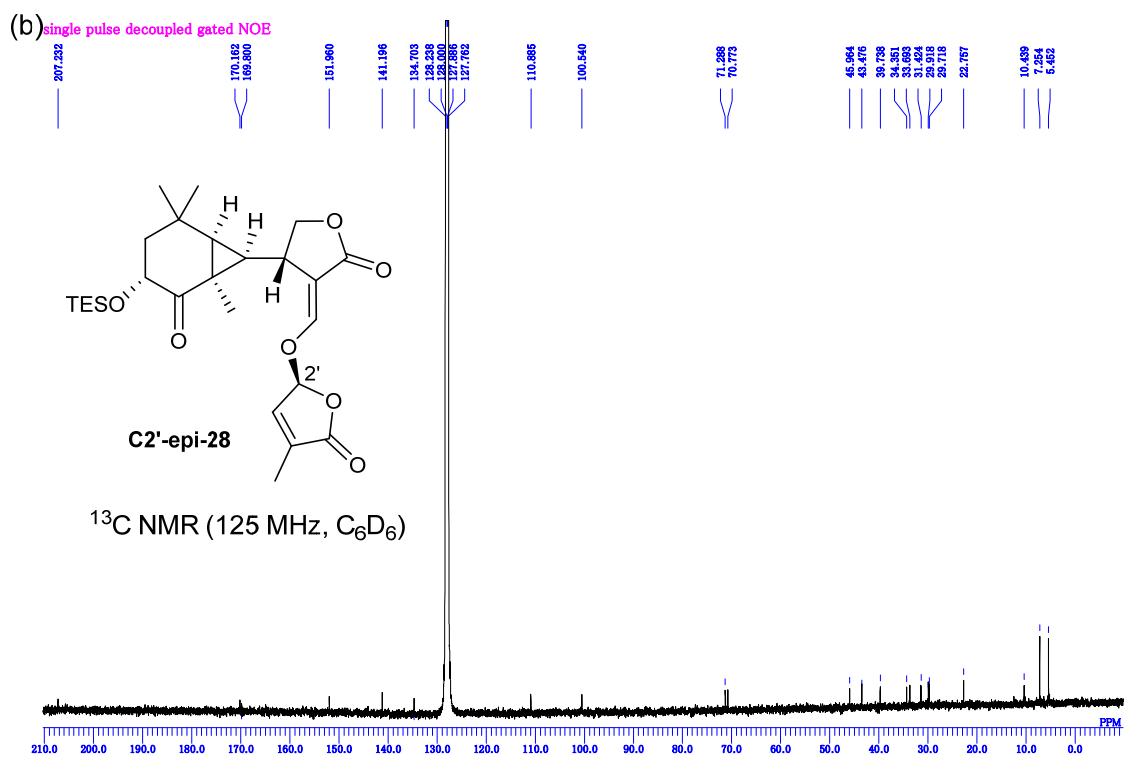

Supplementary Fig. 35.  $^1\text{H}$  (a) and  $^{13}\text{C}$  NMR (b) spectra of C2'-epi-28

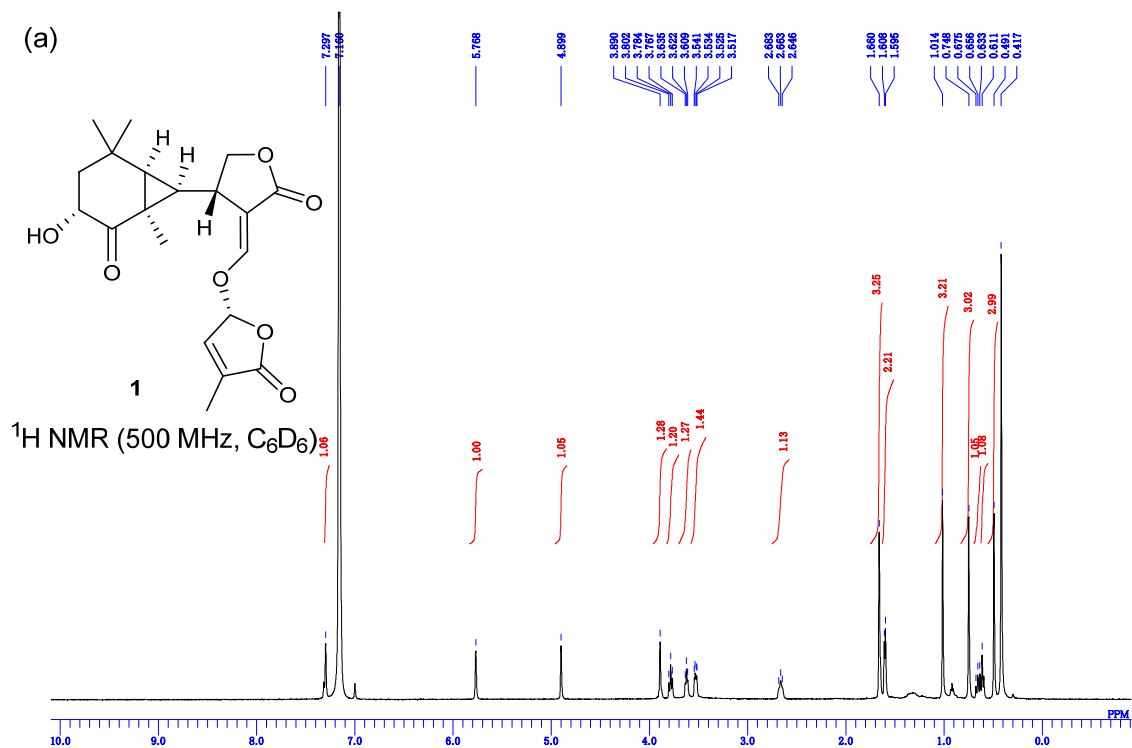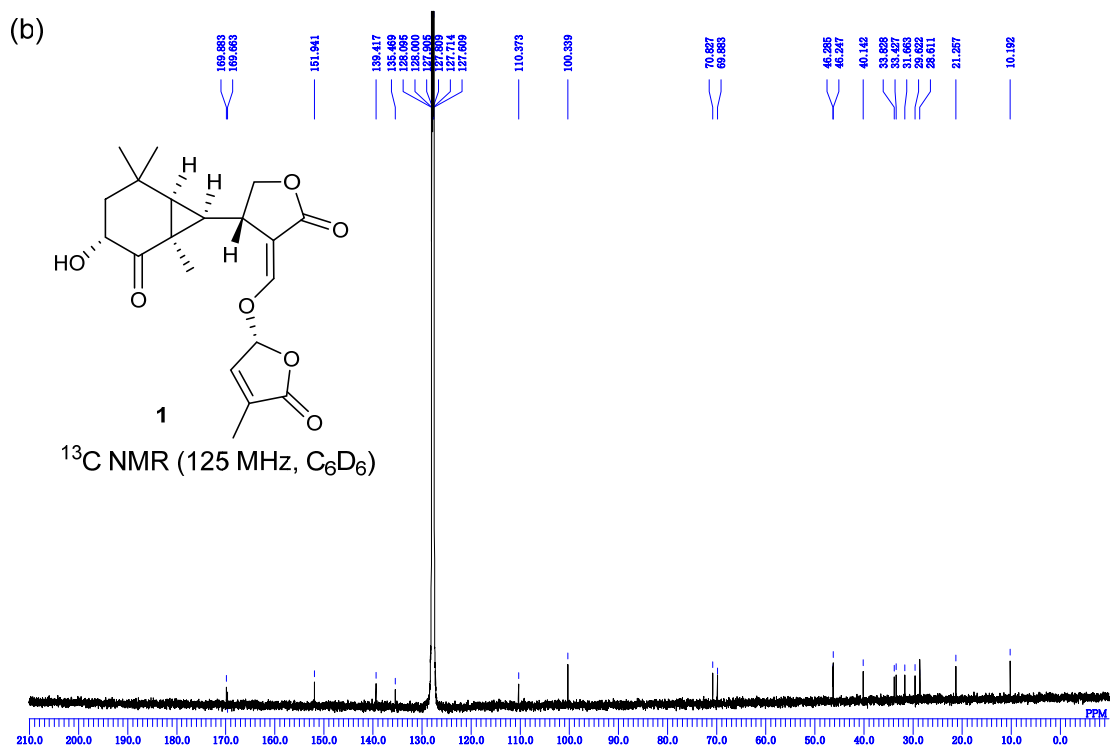

Supplementary Fig. 36.  $^1\text{H}$  (a) and  $^{13}\text{C}$  NMR (b) spectra of **1**

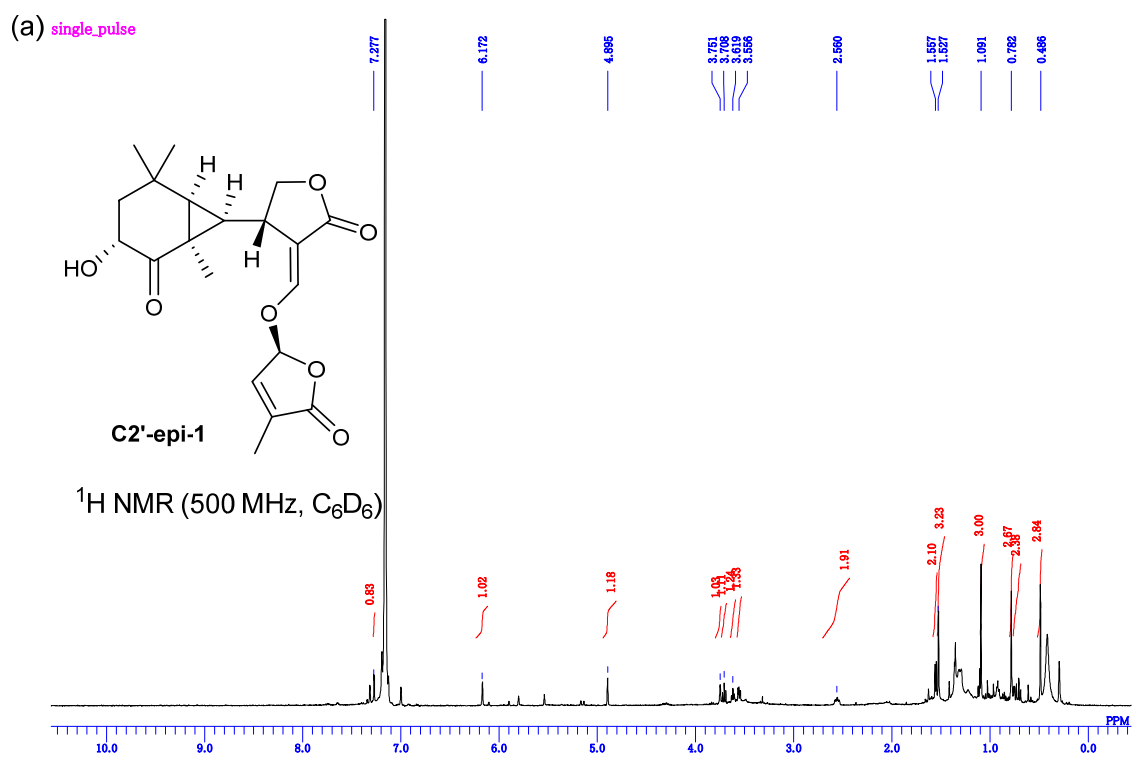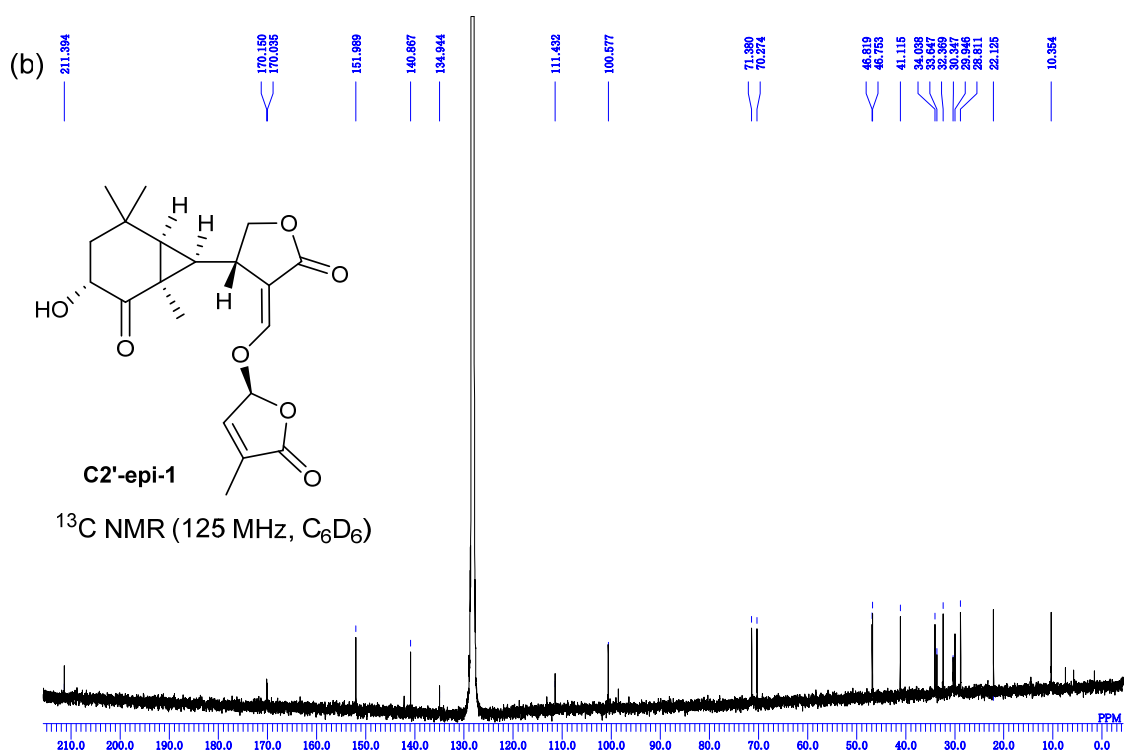

Supplementary Fig. 37.  $^1\text{H}$  (a) and  $^{13}\text{C}$  NMR (b) spectra of C2'-epi-1

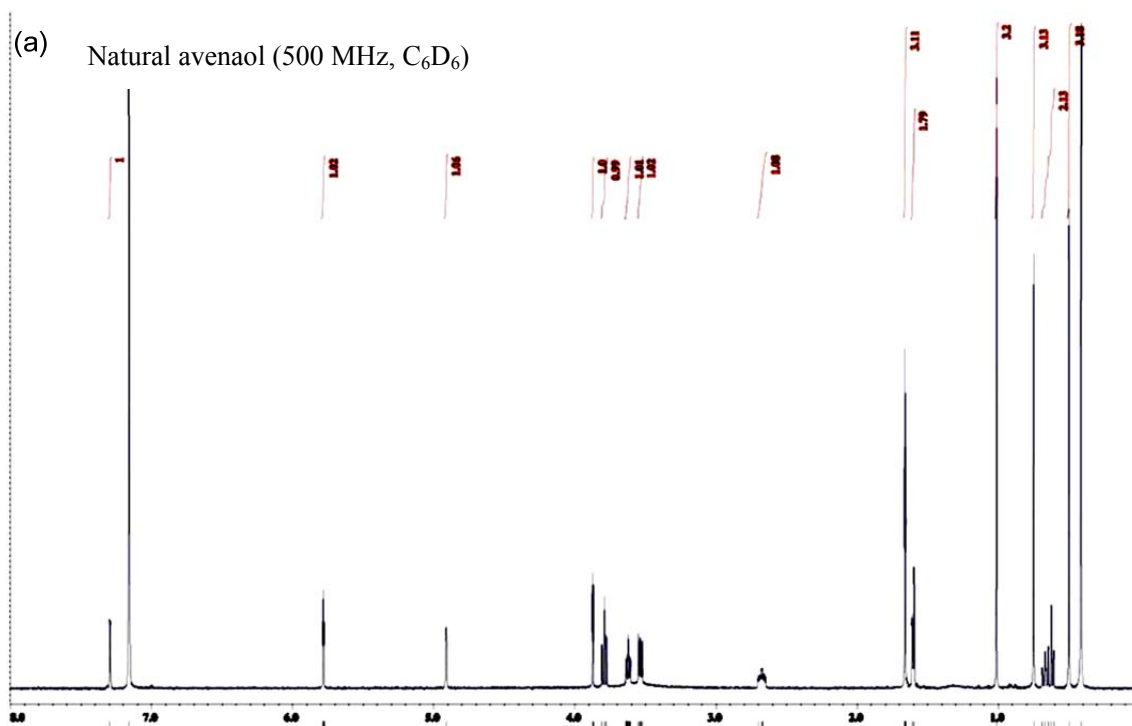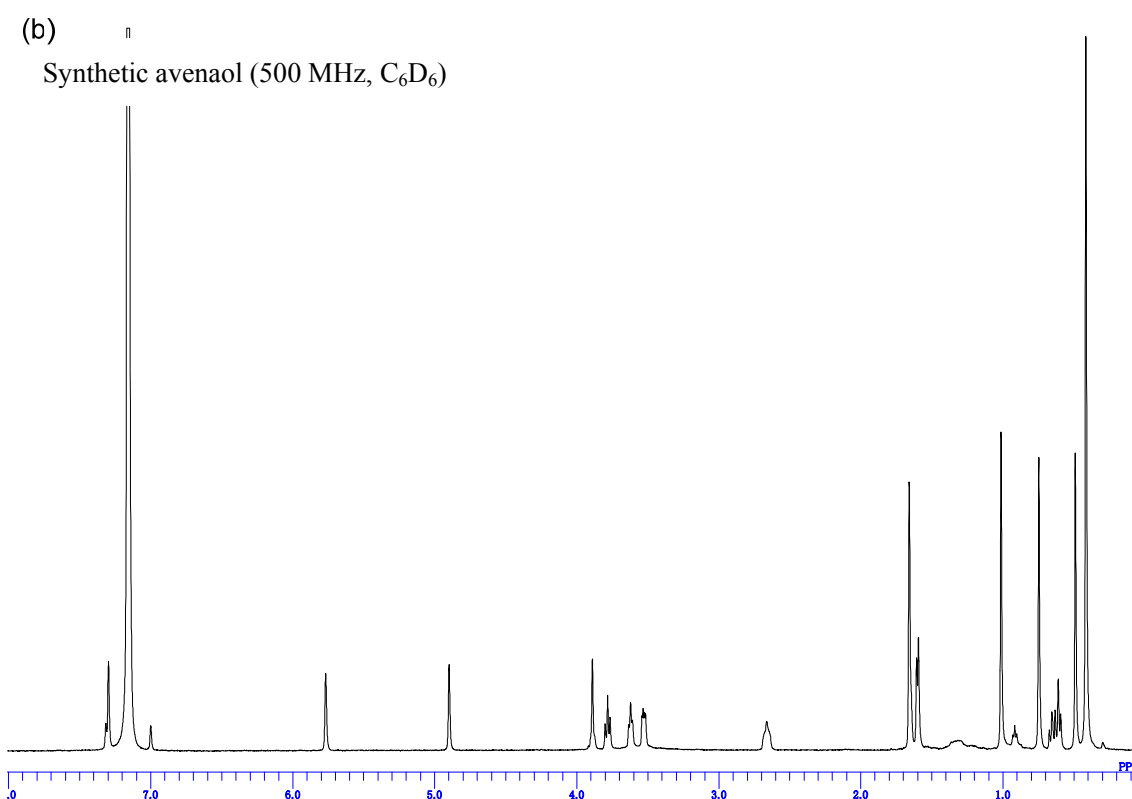

Supplementary Fig. 38. Comparison of <sup>1</sup>H NMR spectra of the natural (a) and synthetic avenaol (b).

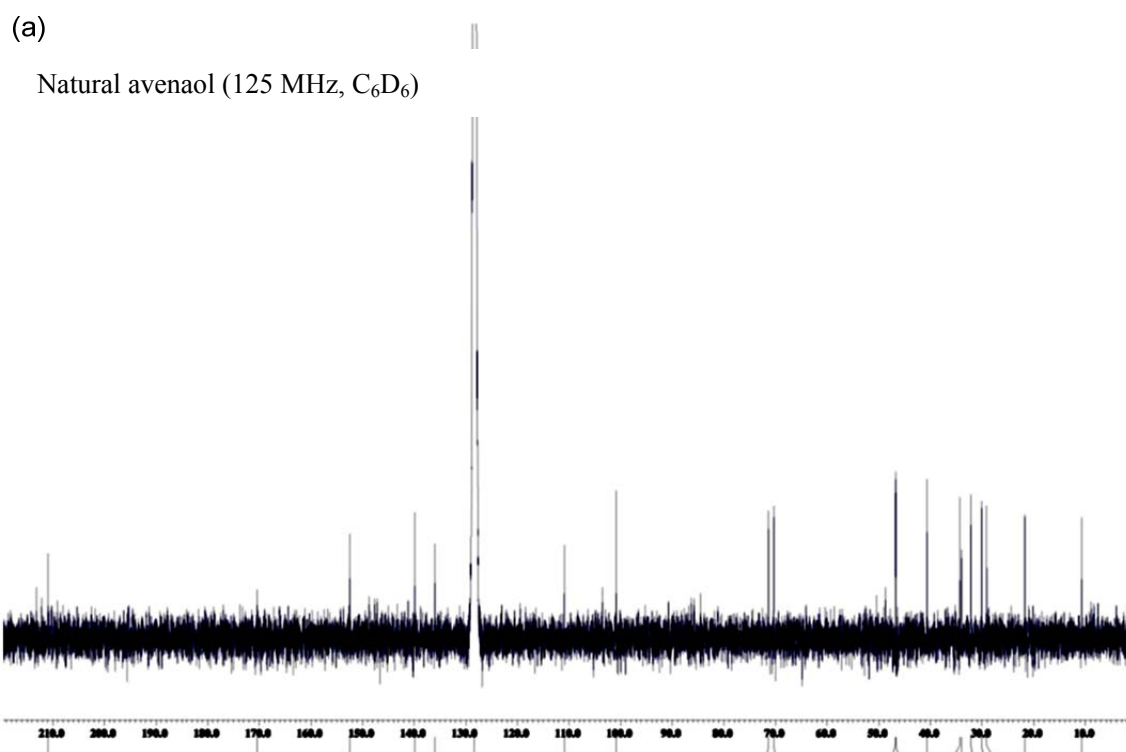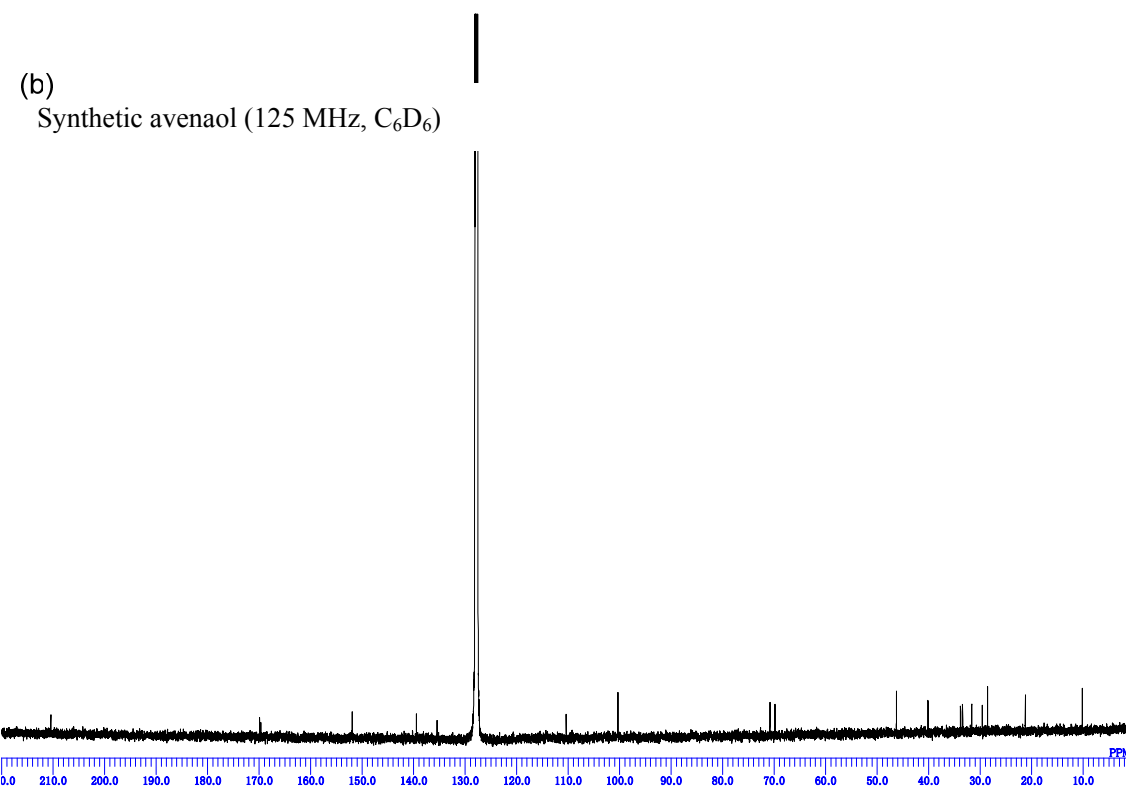

Supplementary Fig. 39. Comparison of <sup>13</sup>C NMR spectra of the natural (a) and synthetic avenaol (b).
